# Supplementary material
Source: PubMed Central journal article supplement (PMC10720158)
Supplement: NIHMS1931733-supplement-Lv_et_al__Science__Supplementary_Material.pdf [file NIHMS1931733-supplement-Lv_et_al__Science__Supplementary_Material.pdf]

1 **Supplementary Materials for**

2 **Modulation of the Proteostasis Network Promotes Tumor Resistance to Oncogenic KRAS**

3 **Inhibitors**

4 Xiangdong Lv<sup>1,2#</sup>, Xuan Lu<sup>1,2#</sup>, Jin Cao<sup>1,2#</sup>, Qin Luo<sup>1,2</sup>, Yao Ding<sup>1,2</sup>, Fanglue Peng<sup>1,2</sup>, Apar  
5 Pataer<sup>15</sup>, Dong Lu<sup>1,4,5</sup>, Dong Han<sup>1,2</sup>, Eric Malmberg<sup>1,2</sup>, Doug W. Chan<sup>1,2</sup>, Xiaoran Wang<sup>1,2</sup>, Sara  
6 R. Savage<sup>2,6</sup>, Sufeng Mao<sup>1,2</sup>, Jingjing Yu<sup>1,2</sup>, Fei Peng<sup>1,7</sup>, Liang Yan<sup>8</sup>, Huan Meng<sup>1</sup>, Laure  
7 Maneix<sup>1,9</sup>, Yumin Han<sup>1,2</sup>, Yiwen Chen<sup>10</sup>, Wantong Yao<sup>11</sup>, Eric C. Chang<sup>1,2</sup>, Andre Catic<sup>1,9</sup>, Xia  
8 Lin<sup>12</sup>, George Miles<sup>2,6</sup>, Pengxiang Huang<sup>1</sup>, Zheng Sun<sup>1,7</sup>, Bryan Burt<sup>13</sup>, Huamin Wang<sup>14</sup>, Jin  
9 Wang<sup>1,4,5</sup>, Qizhi Cathy Yao<sup>12</sup>, Bing Zhang<sup>2,6</sup>, Jack A. Roth<sup>15</sup>, Bert W. O'Malley<sup>1</sup>, Matthew J.  
10 Ellis<sup>2,3</sup>, Mothaffar F. Rimawi<sup>2</sup>, Haoqiang Ying<sup>8\*</sup>, Xi Chen<sup>1,2\*</sup>

11 **Correspondence to:** [Xi.Chen@bcm.edu](mailto:Xi.Chen@bcm.edu), or [hying@mdanderson.org](mailto:hying@mdanderson.org)

12  
13 **The PDF file includes:**

14 Figs. S1-S18

15 Tables S1-S5

16 **Other Supplementary Materials for this manuscript include the following:**

17 MDAR Reproducibility Checklist

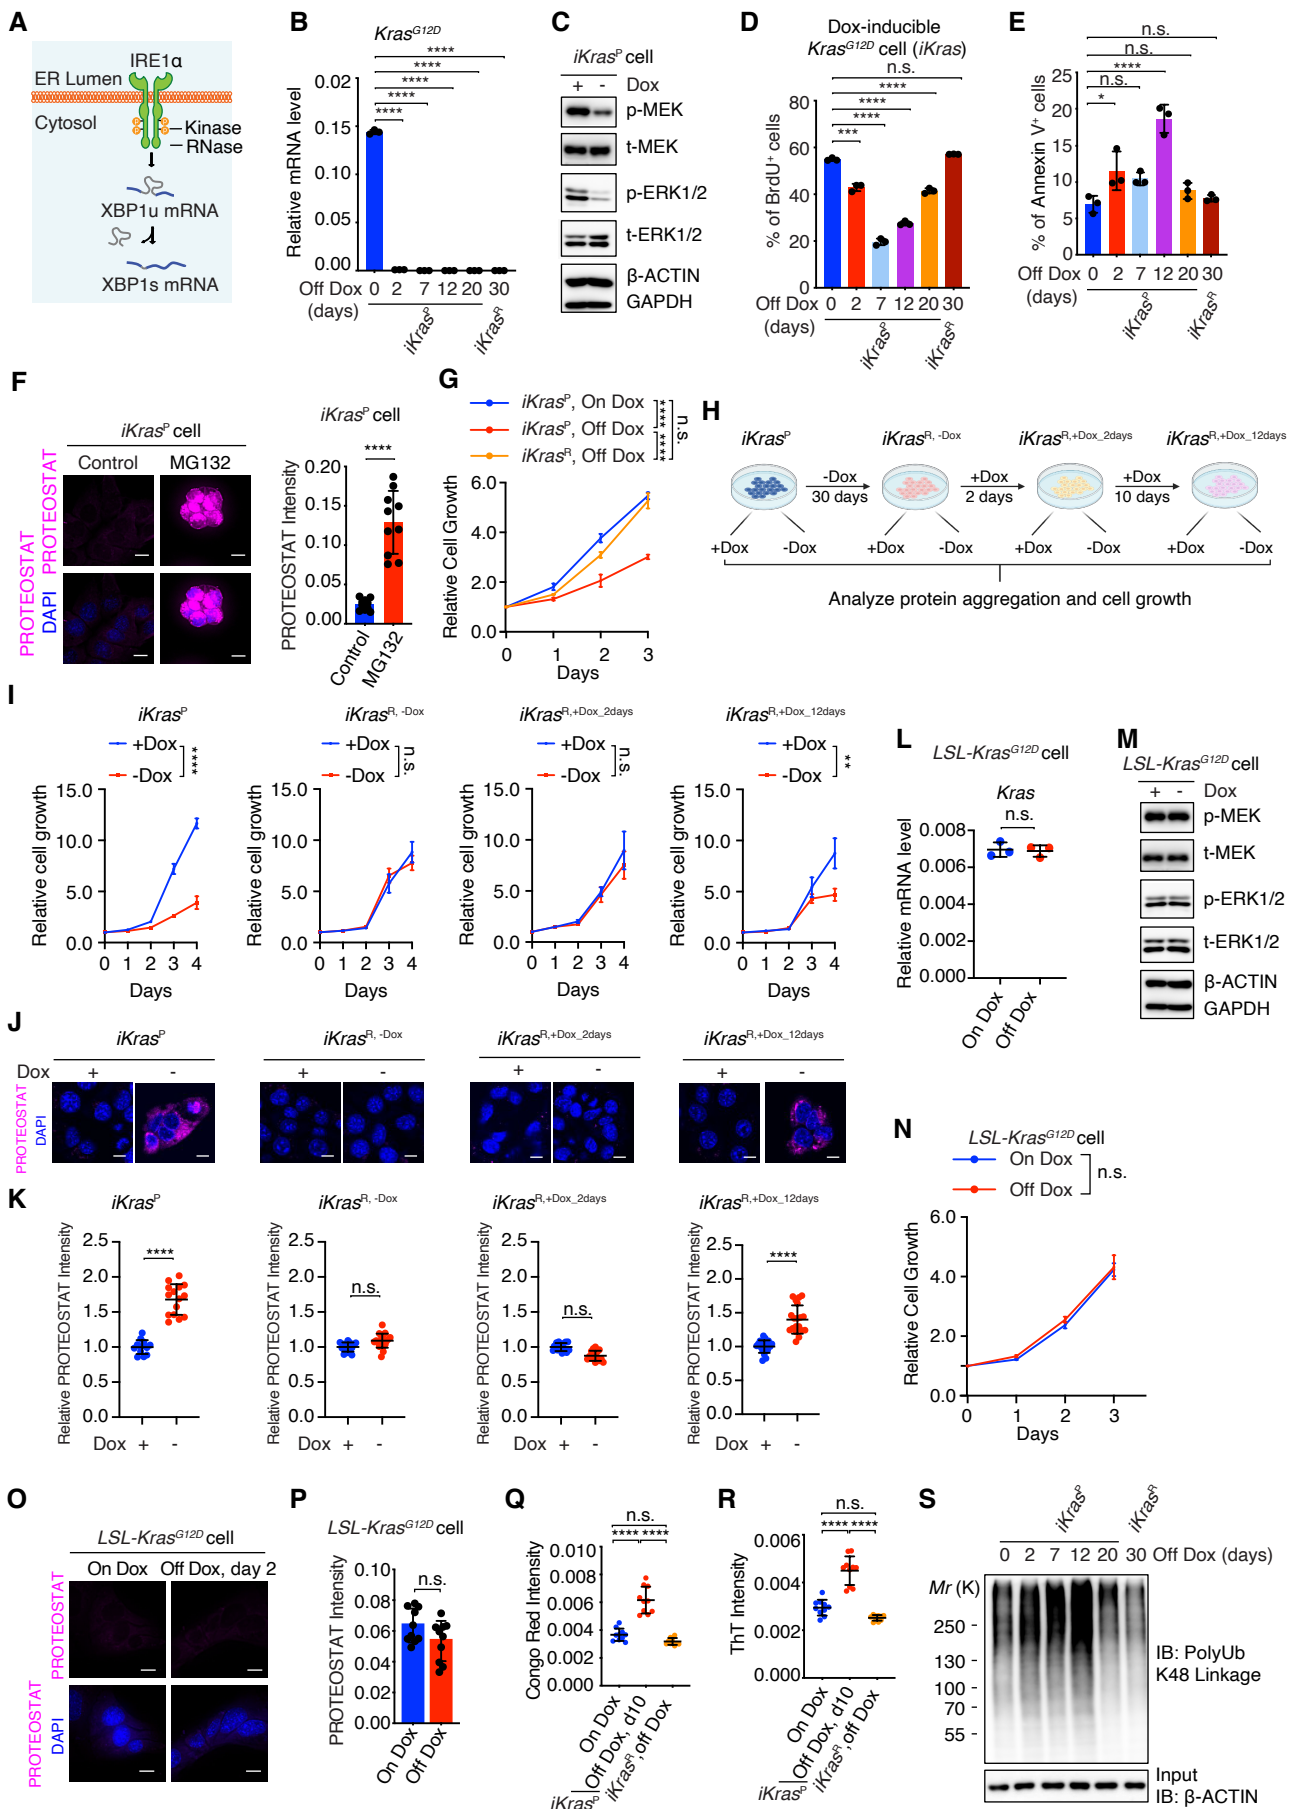

Figure S1. Characterization of mutant KRAS inhibition resistant *iKras<sup>R</sup>* cells

Caption on next page.

**Figure S1. Characterization of mutant KRAS inhibition resistant *iKras<sup>R</sup>* cells**

**A.** Schematic illustration of the IRE1 $\alpha$ /XBP1 pathway. **B.** RT-qPCR analysis of *Kras<sup>G12D</sup>* expression in *iKras* cells at different time points after doxycycline (Dox) withdrawal (Off Dox) until the cells acquired resistance to *Kras<sup>G12D</sup>* inactivation (*iKras<sup>R</sup>* cell). *iKras<sup>P</sup>*: parental Dox-inducible *Kras<sup>G12D</sup>* PDAC cells. Dox: 1  $\mu$ g/mL. Data are presented as mean  $\pm$  SD relative to *Actb*,  $n=3$ . The data are representative of 3 independent experiments. **C.** Immunoblot of total and phosphorylated MEK (Ser217/221, p-MEK) and ERK1/2 (Thr202/Tyr204, p-ERK1/2) in whole-cell lysates of *iKras<sup>P</sup>* cells cultured in the presence or absence of doxycycline (Dox, 1  $\mu$ g/mL) for 2 days. **D.** Quantification of BrdU+ *iKras* cells at different time points after *Kras<sup>G12D</sup>* inactivation by doxycycline (Dox)-withdrawal (Off Dox) until the cells acquired resistance to *Kras<sup>G12D</sup>* inactivation (*iKras<sup>R</sup>* cell). Data are presented as mean  $\pm$  SD,  $n=3$ . **E.** Quantification of Annexin V+ apoptotic *iKras<sup>P</sup>* cells at different time points after *Kras<sup>G12D</sup>* inactivation by Dox-withdrawal (Off Dox) until the cells acquired resistance to *Kras<sup>G12D</sup>* inactivation (*iKras<sup>R</sup>* cell). Data are presented as mean  $\pm$  SD,  $n=3$ . **F.** Representative images (**left**) and quantification (**right**) of PROTEOSTAT (magenta) and DAPI (blue) staining in *iKras<sup>P</sup>* cells treated with DMSO or 5 $\mu$ M MG132 for 16h. Data represent the average fluorescence intensity of PROTEOSTAT /cell from each image acquired and are presented as mean  $\pm$  SD from  $n=10$  images. Scale bar: 20 $\mu$ m. **G.** Quantification of cell growth of *iKras<sup>P</sup>* or *iKras<sup>R</sup>* cells in the presence or absence of Dox for indicated time points using CCK-8 assay. Data are normalized to the OD450 at day 0 and presented as mean  $\pm$  SD,  $n=3$ . **H.** *iKras<sup>P</sup>* cells cultured in the absence of Dox for 30 days acquired resistance to *Kras<sup>G12D</sup>* inhibition and was designated as *iKras<sup>R,-Dox</sup>* cells. Dox was added back to *iKras<sup>R,-Dox</sup>* cells for 2 days (*iKras<sup>R,-Dox,2days</sup>*) or 12 days (*iKras<sup>R,-Dox,12days</sup>*), and then removed to test the resistance phenotypes by measuring cell growth and proteostasis. **I.** Quantification of cell growth of *iKras<sup>P</sup>*, *iKras<sup>R,-Dox</sup>*, *iKras<sup>R,-Dox,2days</sup>* or *iKras<sup>R,-Dox,12days</sup>* cells in the presence or absence of Dox for indicated time points using CCK-8 assay. Data are normalized to the OD450 at day 0 and presented as mean  $\pm$  SD,  $n=3$ . **J-K.** Representative images (**J**) and quantification (**K**) of PROTEOSTAT and DAPI staining in *iKras<sup>P</sup>*, *iKras<sup>R,-Dox</sup>*, *iKras<sup>R,-Dox,2days</sup>* or *iKras<sup>R,-Dox,12days</sup>* cells cultured in the presence or absence of Dox for 2 days. Data represent the average fluorescence intensity of PROTEOSTAT/cell from each image acquired and presented as mean  $\pm$  SD relative to '+Dox' group from  $n=15$  images. Scale bar: 20 $\mu$ m. **L.** RT-qPCR analysis of *Kras* expression in *LSL-Kras<sup>G12D</sup>* cells cultured in the presence or absence of Dox for 2 days. Data are presented as mean  $\pm$  SD relative to *Actb*,  $n=3$ . The data are representative of 3 independent experiments. **M.** Immunoblot of total and phosphorylated MEK and ERK1/2 in whole-cell lysates of *LSL-Kras<sup>G12D</sup>* cells cultured in the presence or absence of Dox for 2 days. **N.** Quantification of cell viability of *LSL-Kras<sup>G12D</sup>* cells cultured in the presence or absence of Dox for indicated time using CCK-8 assay. Data are normalized to the OD450 at day 0, and presented as mean  $\pm$  SD,  $n=3$ . **O-P.** Representative images (**O**) and quantification (**P**) of PROTEOSTAT (magenta) and DAPI (blue) staining in *LSL-Kras<sup>G12D</sup>* cells cultured in the presence or absence of Dox for 2 days. Data represent the average fluorescence intensity of PROTEOSTAT/cell from each image acquired and are presented as mean  $\pm$  SD from  $n=10$  images. Scale bar: 20 $\mu$ m. **Q-R.** Quantification of Congo Red (CR) (**Q**) and ThT (**R**) fluorescence intensity in *iKras<sup>P</sup>* cells cultured in the presence or absence of doxycycline (Off Dox) for 10 days, or in the cells that acquired resistance to *Kras<sup>G12D</sup>* inactivation (*iKras<sup>R</sup>*). Data represent the average fluorescence intensity/cell from each image acquired and are presented as mean  $\pm$  SD from  $n=10$  images. **S.** Immunoblot of polyubiquitin (K48 linkage) in detergent-insoluble aggregates fractionated from *iKras<sup>P</sup>* cells at different time points after *Kras<sup>G12D</sup>* inactivation by Dox-withdrawal (Off Dox) until the cells acquired resistance to *Kras<sup>G12D</sup>* inactivation (*iKras<sup>R</sup>* cell).  $\beta$ -ACTIN in whole-cell lysates served as loading control. IB: immunoblot. Ordinary one-way ANOVA (**B**, **D**, **E**, **Q** and **R**), two-way ANOVA (**G**, **I** and **N**), or 2-tailed, unpaired Student's t test with Fisher's exact test (**F**, **L**, **K** and **P**) was used to calculate *P* values. n.s., not significant, \*  $P < 0.05$ , \*\*  $P < 0.01$ , \*\*\*  $P < 0.001$ , \*\*\*\*  $P < 0.0001$ .

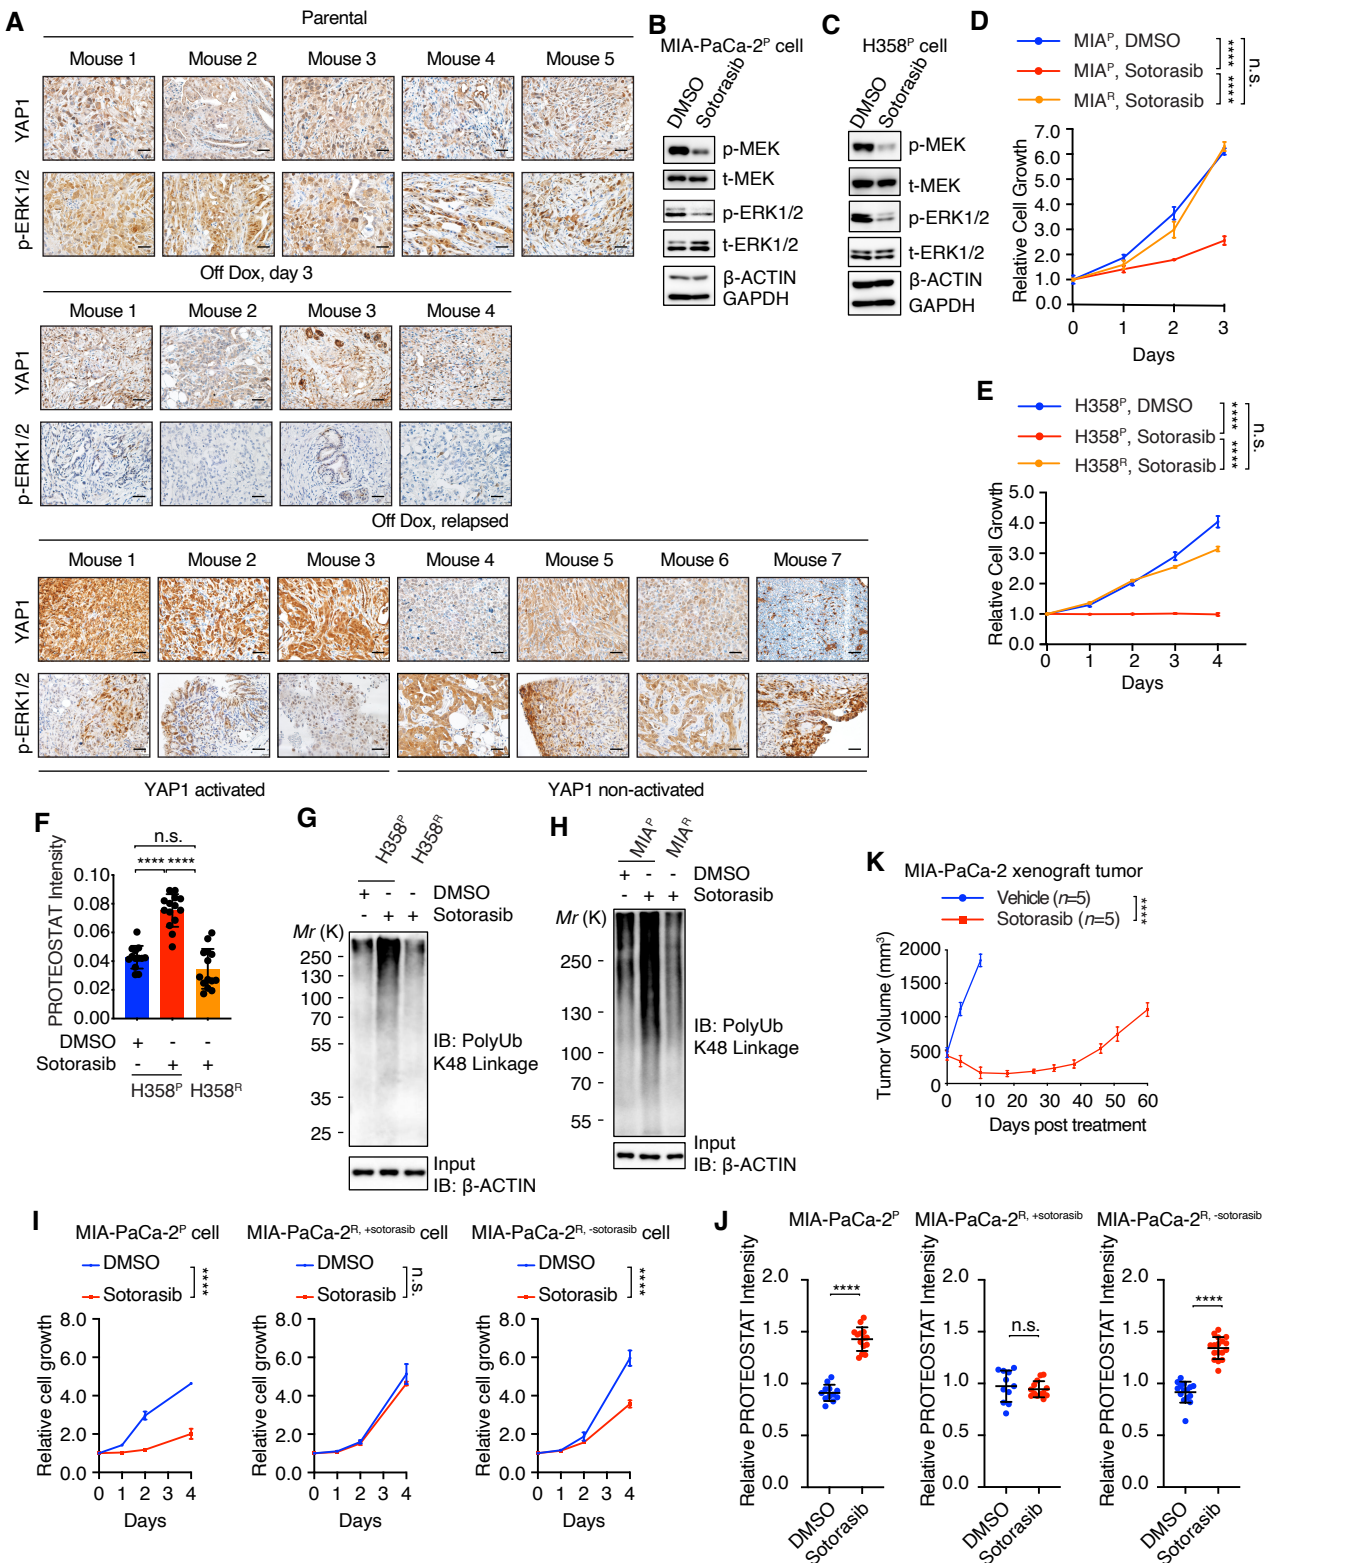

**Figure S2. Characterization of sotorasib-resistant models**

**A.** IHC staining of phospho-ERK1/2 and YAP1 in *iKras* GEMM tumors treated with doxycycline (On Dox), Dox withdrawal for 3 days (Off Dox), or relapsed after 30 weeks of Dox-withdrawal (Off Dox, relapsed) as in Fig. 1D-E. Scale bar: 40µm. **B.** Immunoblot of total and phosphorylated MEK and ERK1/2 in whole-cell lysates of parental MIA-PaCa-2 (MIA-PaCa-2<sup>P</sup>) cells treated with DMSO or 30 nM sotorasib for 2 days. **C.** Immunoblot of total and phosphorylated MEK and ERK1/2 in whole-cell lysates from parental H358 (H358<sup>P</sup>) cells treated with DMSO or 30 nM sotorasib for 2 days. **D.** Quantification of cell growth of parental (MIA<sup>P</sup>) and *in vitro* generated sotorasib-resistant MIA-PaCa-2 cells (MIA<sup>R</sup>) treated with DMSO or 30 nM KRAS<sup>G12C</sup> inhibitor sotorasib for indicated time using CCK-8 assay. Data are normalized to the OD450 at day 0, and presented as mean ± SD, *n*=3. **E.** Quantification of cell growth of parental (H358<sup>P</sup>) and sotorasib-resistant H358 cells (H358<sup>R</sup>) treated with DMSO or 30 nM sotorasib for indicated time using CCK-8 assay. Data are normalized to the OD450 at day 0 and presented as mean ± SD, *n*=3. **F.** Quantification of PROTEOSTAT intensity in H358<sup>P</sup> cells treated with DMSO or 30nM sotorasib for 2 days or in the sotorasib-resistant H358<sup>R</sup> cells. Data represent the average fluorescence intensity of PROTEOSTAT/cell from each image acquired (>10 cells per image) and are presented as mean ± SD from *n*=14 images. **G.** Immunoblot of polyubiquitin (K48 linkage) in detergent-insoluble aggregates fractionated from H358<sup>P</sup> cells treated with DMSO or 30nM sotorasib for 2 days or from the sotorasib-resistant H358<sup>R</sup> cells. β-ACTIN from whole-cell lysates served as loading control. IB, immunoblot. **H.** Immunoblot of polyubiquitin (K48 linkage) in detergent-insoluble aggregates fractionated from parental MIA-PaCa-2 (MIA<sup>P</sup>) cells treated with DMSO or 30nM sotorasib for 2 days or from MIA<sup>R</sup> cells treated with 30nM sotorasib. β-ACTIN in whole-cell lysates served as loading control. IB, immunoblot. **I.** Quantification of cell growth of MIA-PaCa-2<sup>P</sup>, MIA-PaCa-2<sup>R, +sotorasib</sup> and MIA-PaCa-2<sup>R, -sotorasib</sup> cells treated with DMSO or 30 nM sotorasib for indicated time using CCK-8 assay. MIA-PaCa-2<sup>R, +sotorasib</sup> cell is the sotorasib-resistant MIA-PaCa-2<sup>R</sup> cells cultured constantly in the presence of 30 nM sotorasib *in vitro*. Sotorasib was removed from the culture medium of MIA-PaCa-2<sup>R, +sotorasib</sup> cell for 14 days (MIA-PaCa-2<sup>R, -sotorasib</sup>) and then added back to test the resistance phenotypes. Data are normalized to the OD450 at day 0, and presented as mean ± SD, *n*=3. **J.** Quantification of PROTEOSTAT intensity in MIA-PaCa-2<sup>P</sup>, MIA-PaCa-2<sup>R, +sotorasib</sup> and MIA-PaCa-2<sup>R, -sotorasib</sup> cells treated with DMSO or 30 nM sotorasib for 2 days. Data represent the average fluorescence intensity of PROTEOSTAT/cell from each image acquired and presented as mean ± SD relative to DMSO group from *n*=12 images. **K.** Tumor volume quantification of established MIA-PaCa-2 xenograft tumors treated with vehicle (*n*=5) or sotorasib (30mg/kg, *n*=5). Data are presented as mean ± SEM. Ordinary one-way ANOVA (F), Two-way ANOVA test (D, E, I and K), or 2-tailed, unpaired Student's *t* test (J) was used to calculate *P* values. n.s., not significant, \* *P*<0.05, \*\* *P*<0.01, \*\*\* *P*<0.001, \*\*\*\* *P*<0.0001.

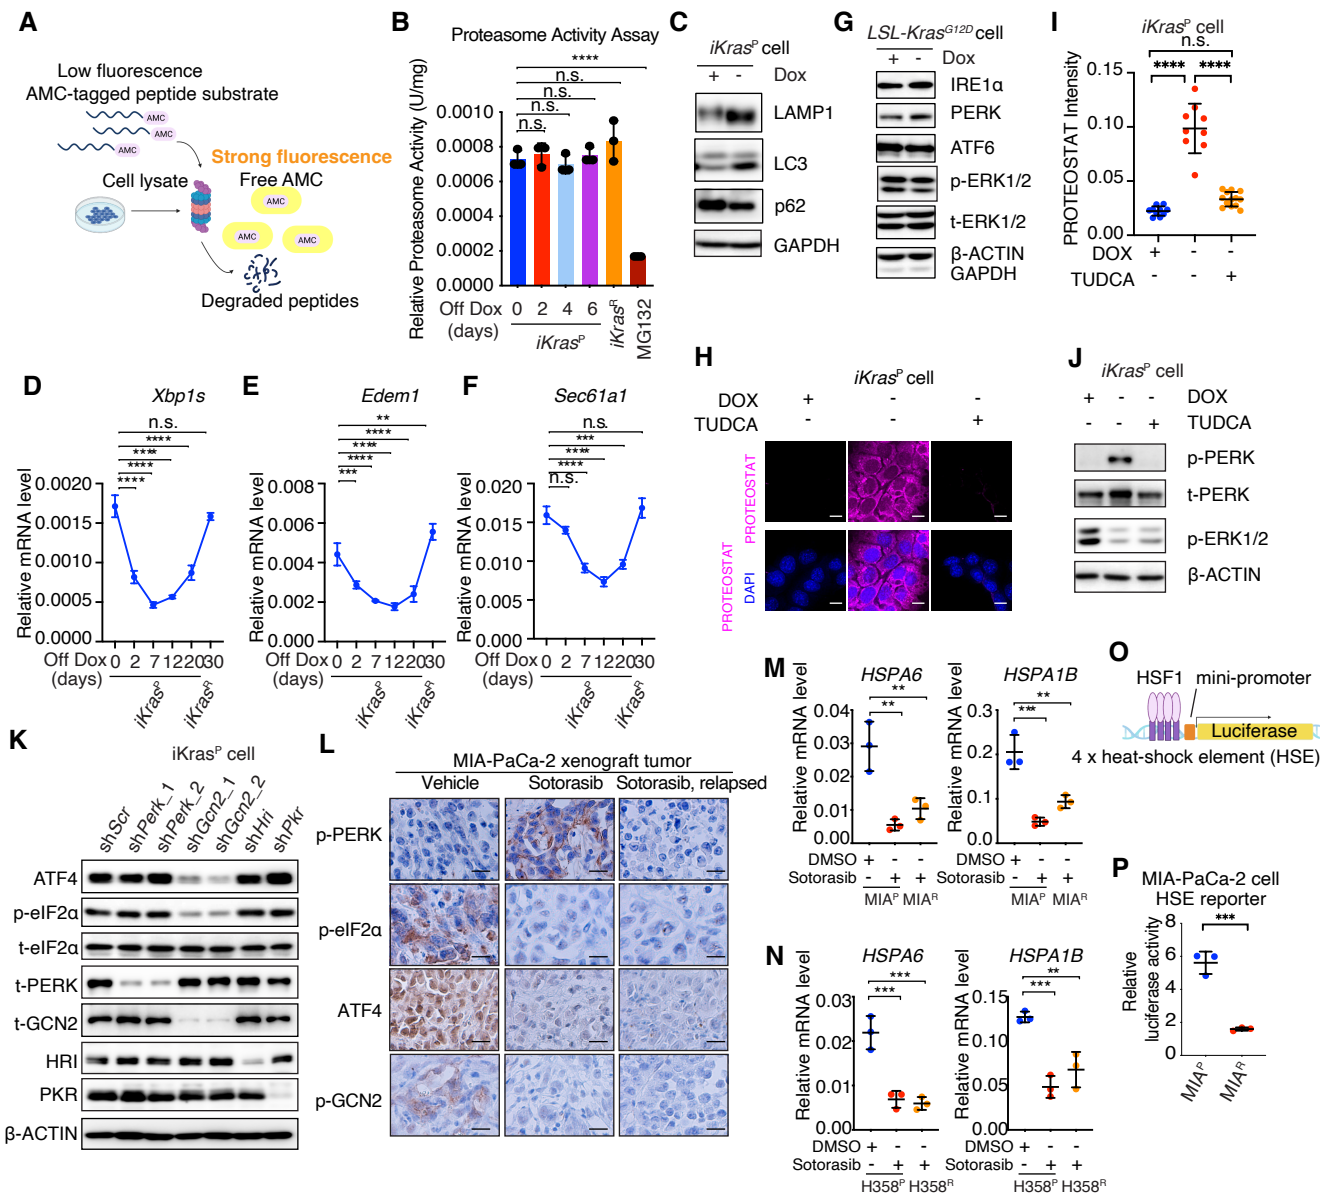

**Figure S3. Mutant KRAS inactivation reprograms proteostasis network**

**A.** Diagram showing the fluorometric assay that measures the chymotrypsin-like protease activity of the proteasome. In the presence of proteolytic activity of the proteasome, an AMC-tagged peptide substrate (low fluorescence) is degraded, leading to the release of free and highly fluorescent AMC. **B.** Quantification of proteasome activity of parental *iKras* cells (*iKras<sup>fl</sup>*) at different time points after *Kras<sup>G12D</sup>* inactivation by Dox withdrawal (Off Dox) or the cells that acquired resistance to *Kras<sup>G12D</sup>* inactivation (*iKras<sup>res</sup>*). MG132 inhibits proteasome activity and was used as a positive control at a concentration of 10  $\mu$ M. Average proteasome activities normalized against total protein abundance are presented as mean  $\pm$  SD,  $n=3$ . **C.** Immunoblot of LAMP1, LC3 and P62 in whole-cell lysates of *iKras<sup>fl</sup>* cells cultured in the presence or absence of doxycycline (Dox) for 2 days. **D-F.** RT-qPCR analysis of spliced *Xbp1* (*Xbp1s*), IRE $\alpha$ /XBP1 targets *Edem1* and *Sec61a1* expression in *iKras<sup>fl</sup>* cells at different time points after Dox withdrawal (Off Dox) until the cells acquired resistance to *Kras<sup>G12D</sup>* inactivation (*iKras<sup>res</sup>* cell). Data are presented as mean  $\pm$  SD relative to *Actb*,  $n=3$ . The data are representative of 3 independent experiments. **G.** Immunoblot of UPR markers in *LSL-Kras<sup>G12D</sup>* cells cultured in the presence or absence of Dox for 2 days. **H-I.** Representative image (**H**) and quantification (**I**) of PROTEOSTAT (magenta) and DAPI (blue) staining in *iKras<sup>fl</sup>* cells cultured in the presence or absence of Dox for 4 days. Cells were also treated with 1.0 mM TUDCA dissolved in water for 2 days before collection as indicated. Data represent the average fluorescence intensity of PROTEOSTAT/cell from each image acquired (>10 cells per image) and presented as mean  $\pm$  SD from  $n=10$  images. Scale bar: 20  $\mu$ m. **J.** Immunoblot of t-PERK, p-PERK and p-ERK1/2 in whole-cell lysates of *iKras<sup>fl</sup>* cells treated as in (**H-I**).  $\beta$ -ACTIN in whole-cell lysates served as loading control. **K.** Immunoblot of ATF4, total-eIF2 $\alpha$  (t-eIF2 $\alpha$ ), phospho-eIF2 $\alpha$  (p-eIF2 $\alpha$ ), PERK, GCN2, HRI and PKR in whole-cell lysates of *iKras<sup>fl</sup>* cells infected with lentiviruses encoding *scramble* shRNA (shScr), *Perk* shRNAs (shPerk\_1 and shPerk\_2), *Gcn2* shRNAs (shGcn2\_1 and shGcn2\_2), *Hri* shRNA (shHri) or *Pkr* shRNA (shPkr).  $\beta$ -ACTIN in whole-cell lysates served as loading control. **L.** Immunohistochemical staining of p-PERK, p-eIF2 $\alpha$ , ATF4 or p-GCN2 in MIA-PaCa-2 xenograft tumors treated with vehicle, sotorasib (100mg/kg for 4 days), or relapsed after 9 weeks of sotorasib treatment (100mg/kg). Scale bar: 40  $\mu$ m. **M-N.** RT-qPCR analysis of HSF1 targets *HSPA6* and *HSPA1B* in parental MIA-PaCa-2 (MIA<sup>fl</sup>) (**M**) or H358 (H358<sup>fl</sup>) (**N**) cells treated with DMSO or 30 nM sotorasib for 2 days or in the sotorasib-resistant MIA<sup>res</sup> or H358<sup>res</sup> cells. Cells were heat shocked for 1 h at 43  $^{\circ}$ C and recovered for 4 h before harvest. Data are presented relative to *ACTIN* and shown as mean  $\pm$  SD,  $n=3$ . **O.** Schematic of the heat shock element (HSE) luciferase reporter. **P.** The MIA-PaCa-2<sup>fl</sup> or MIA-PaCa-2<sup>res</sup> cells were transfected with the HSE luciferase reporter. After selection, cells were then heat shocked for 1 h at 43  $^{\circ}$ C and recovered overnight before luciferase activities were measured. Data are presented as relative *Firefly* luciferase activities normalized against *Renilla* luciferase activities and shown as mean  $\pm$  SD,  $n=3$ . Ordinary one-way ANOVA (**B**, **D**, **E**, **F**, **I**, **M** and **N**) and 2-tailed, unpaired Student's *t* test (**P**) were used to calculate *P* values. n.s., not significant, \*  $P < 0.05$ , \*\*  $P < 0.01$ , \*\*\*  $P < 0.001$ , \*\*\*\*  $P < 0.0001$ .

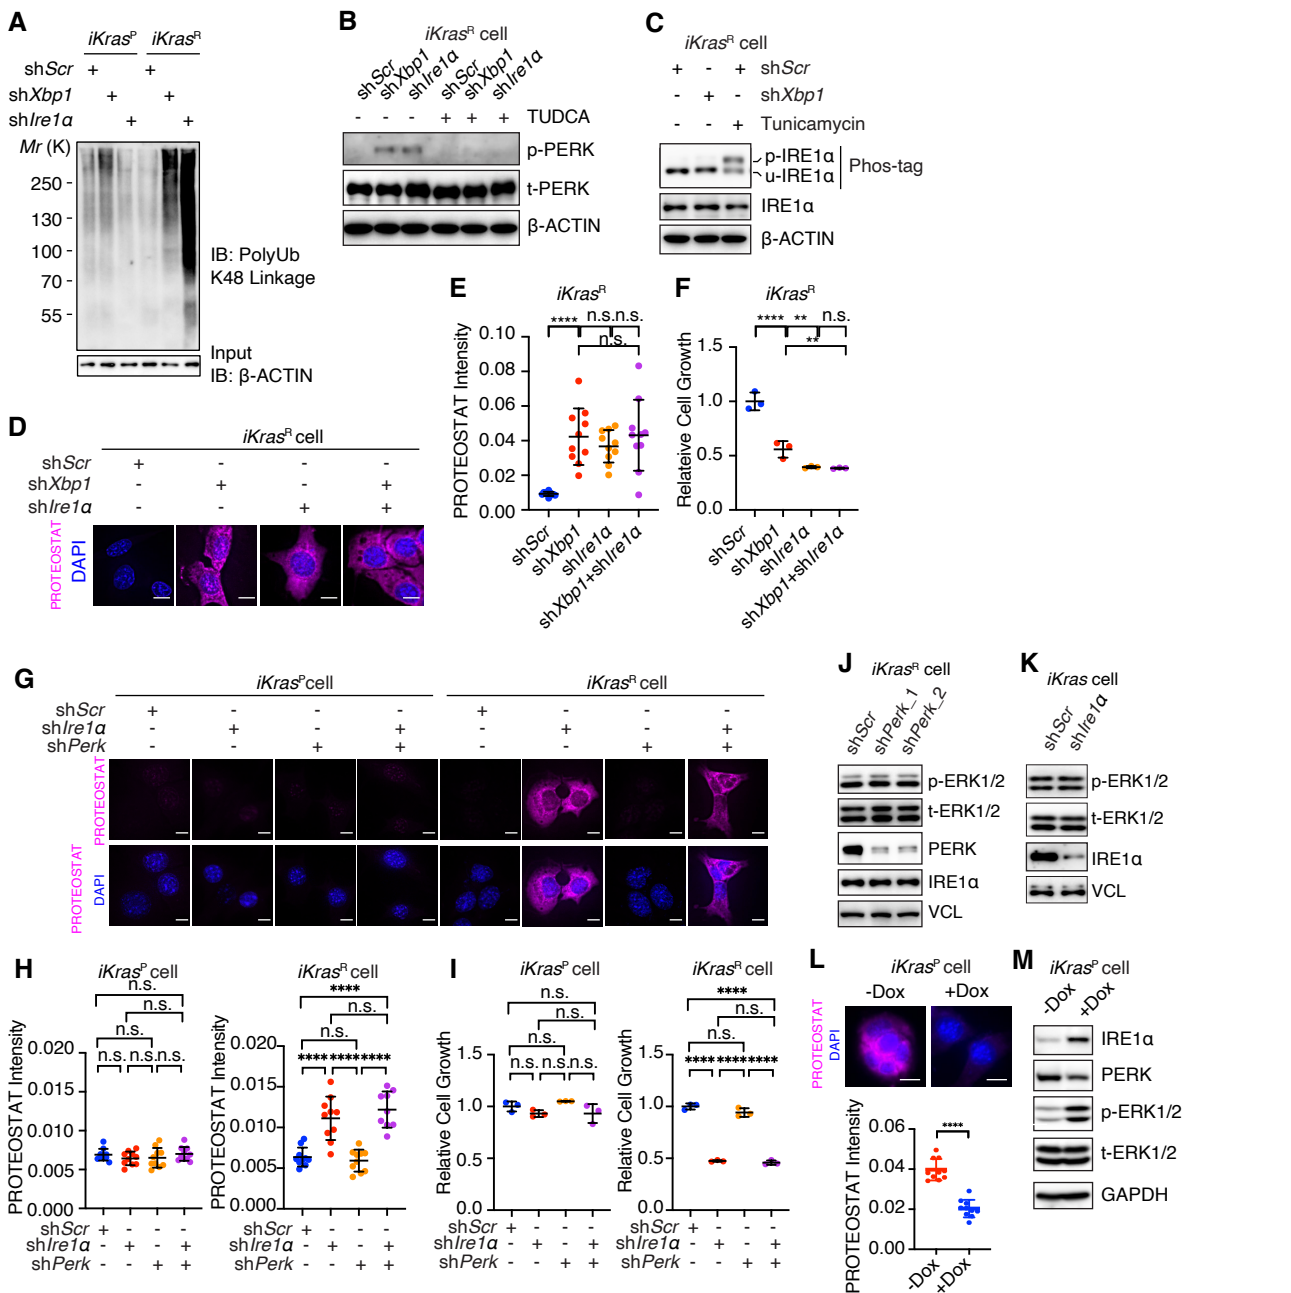

**Figure S4. IRE1 $\alpha$ , but not PERK, sustains proteostasis in KRASi resistant cells**

**A.** Immunoblot of polyubiquitin (K48 linkage) in detergent-insoluble aggregates fractionated from *iKras<sup>fl</sup>* or *iKras<sup>fl</sup>* cells infected with lentiviruses encoding shScr, shXbp1 or shIre1a.  $\beta$ -ACTIN in whole protein lysates served as loading control. IB, immunoblot. **B.** Immunoblot of total-PERK and phospho-PERK in *iKras<sup>fl</sup>* cells infected with lentiviruses encoding scramble shRNA (shScr), Xbp1s shRNA (shXbp1) or Ire1a shRNA (shIre1a) and treated with or without 2.5mM TUDCA dissolved in water for 2 days.  $\beta$ -ACTIN in whole-cell lysates served as loading control. **C.** Phos-tag SDS-PAGE analysis of IRE1 $\alpha$  activation in whole-cell lysates of *iKras<sup>fl</sup>* cells infected with lentiviruses encoding scramble shRNA (shScr) or Xbp1s shRNA (shXbp1). The *iKras<sup>fl</sup>* cells treated with tunicamycin (5  $\mu$ g/mL) for 6 hours served as positive control. Regular SDS-PAGE was used to monitor IRE1 $\alpha$  total protein level.  $\beta$ -ACTIN in whole-cell lysates served as loading control. **D-E.** Representative images (**D**) and quantification (**E**) of PROTEOSTAT (magenta) and DAPI (blue) staining in *iKras<sup>fl</sup>* cells infected with lentiviruses encoding scramble shRNA (shScr), Ire1a shRNA (shIre1a), Xbp1s shRNA (shXbp1) or shIre1a plus shXbp1. Data represent the average fluorescence intensity of PROTEOSTAT/cell from each image acquired (>10 cells per image) and presented as mean  $\pm$  SD from  $n=10$  images. Scale bar: 20 $\mu$ m. **F.** Impact of Ire1a or Xbp1s silencing on the viability of *iKras<sup>fl</sup>* cells. CCK-8 assay was used to quantify cell viability of *iKras<sup>fl</sup>* infected with lentiviruses encoding scramble shRNA (shScr), Ire1a shRNA (shIre1a), Xbp1s shRNA (shXbp1) or shIre1a plus shXbp1. Data are presented as mean  $\pm$  SD relative to scramble control (shScr),  $n=3$ . **G-H.** Representative images (**G**) and quantification (**H**) of PROTEOSTAT (magenta) and DAPI (blue) staining in *iKras<sup>fl</sup>* and *iKras<sup>fl</sup>* cells infected with lentiviruses encoding scramble shRNA (shScr), Ire1a shRNA (shIre1a) and/or Perk shRNA (shPerk). Data represent the average fluorescence intensity of PROTEOSTAT/cell from each image acquired (>10 cells per image) and presented as mean  $\pm$  SD from  $n=10$  images. Scale bar: 20 $\mu$ m. **I.** Impact of Ire1a or Perk silencing on the viability of *iKras<sup>fl</sup>* or *iKras<sup>fl</sup>* cells. CCK-8 assay was used to quantify cell viability of *iKras<sup>fl</sup>* or *iKras<sup>fl</sup>* infected with lentiviruses encoding shScr, shPerk or shIre1a. Data are presented as mean  $\pm$  SD relative to scramble control (shScr),  $n=3$ . **J.** Immunoblot of IRE1 $\alpha$ , phospho-ERK1/2, total-ERK1/2 and PERK in whole-cell lysates of *iKras<sup>fl</sup>* cells infected with lentiviruses encoding scramble shRNA (shScr) or PERK shRNA (shPERK). VCL in whole-cell lysates served as loading control. **K.** Immunoblot of IRE1 $\alpha$ , phospho-ERK1/2 and total-ERK1/2 in whole-cell lysates of *iKras<sup>fl</sup>* cells infected with lentiviruses encoding scramble shRNA (shScr) or IRE1a shRNA (shIRE1a). VCL in whole-cell lysates served as loading control. **L.** Representative images (upper panels) and quantification (lower panel) of PROTEOSTAT (magenta) and DAPI (blue) staining in *iKras<sup>fl</sup>* cells. The *iKras<sup>fl</sup>* cells were cultured in the absence of Dox for 2 days. After that, the cells were further cultured in the presence or absence of Dox for 2 days followed by PROTEOSTAT staining. Data represent the average fluorescence intensity of PROTEOSTAT/cell from each image acquired (>10 cells per image) and presented as mean  $\pm$  SD from  $n=10$  images. Scale bar: 20 $\mu$ m. **M.** Immunoblot of IRE1 $\alpha$ , PERK, p-ERK1/2 and t-ERK1/2 in *iKras<sup>fl</sup>* cells. The *iKras<sup>fl</sup>* cells were cultured in the absence of Dox for 2 days. After that, the cells were further cultured in the presence or absence of Dox for 2 days followed by western blot analysis. GAPDH in whole-cell lysates served as loading control. Ordinary one-way ANOVA (**E**, **F**, **H** and **I**) and 2-tailed, unpaired Student's  $t$  test (**L**) were used to calculate  $P$  values. n.s., not significant, \*  $P<0.05$ , \*\*  $P<0.01$ , \*\*\*  $P<0.001$ , \*\*\*\*  $P<0.0001$ .

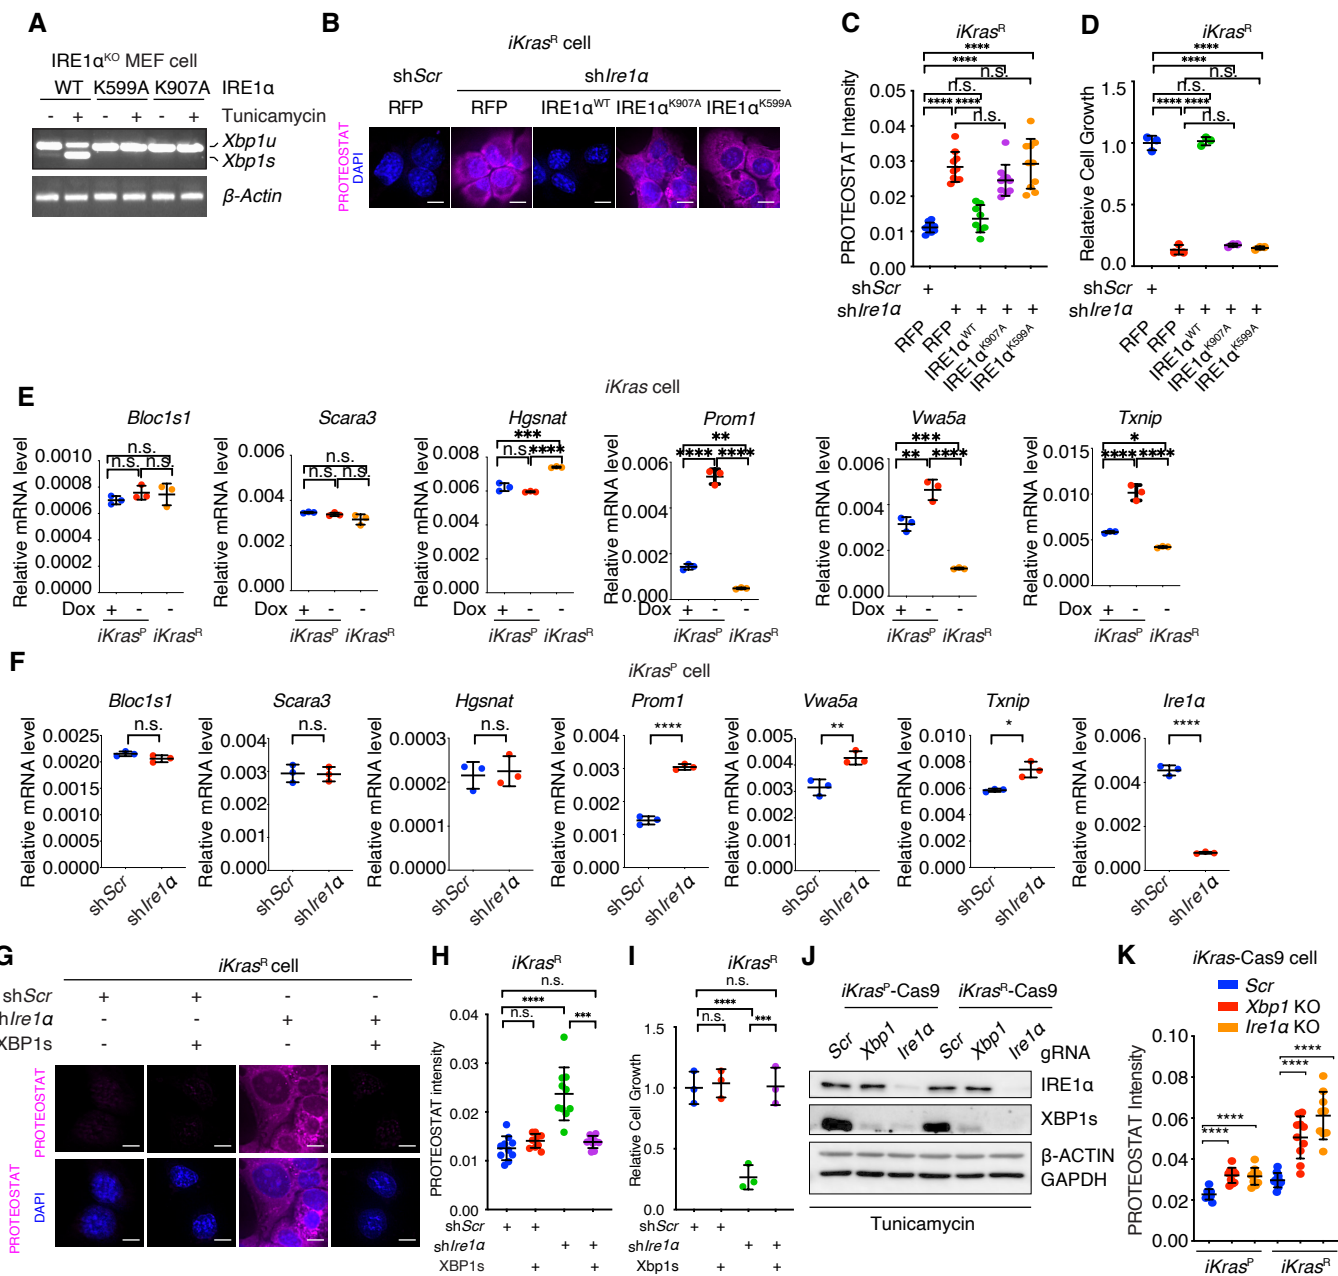

**Figure S5. IRE1α RNase-dependent XBP1 splicing sustains proteostasis in KRASi resistant cells**

**A.** RT-PCR analysis of *Xbp1* splicing in *IRE1α* knock out MEF cells expressing *IRE1α*<sup>WT</sup>, *IRE1α*<sup>K599A</sup> or *IRE1α*<sup>K907A</sup> and treated with DMSO or tunicamycin (TM, 5 μg/mL) for 6 hours as indicated. β-ACTIN served as loading control. **B-C.** Representative images (**B**) and quantification (**C**) of PROTEOSTAT (magenta) and DAPI (blue) staining in *iKras*<sup>R</sup> cells infected with lentiviruses encoding *scramble* shRNA (shScr), *Ire1a* shRNA (shIre1a) and shRNA-resistant *IRE1α*<sup>WT</sup>, *IRE1α*<sup>K599A</sup> or *IRE1α*<sup>K907A</sup>. Data represent the average fluorescence intensity of PROTEOSTAT/cell from each image acquired (>10 cells per image) and presented as mean ± SD from *n*=8 images. Scale bar: 20μm. **D.** Colony formation assay was used to quantify the growth of control (shScr) *iKras*<sup>R</sup> cells or *Ire1a*-knockdown *iKras*<sup>R</sup> cells reconstituted with shRNA-resistant *IRE1α*<sup>WT</sup>, *IRE1α*<sup>K599A</sup> or *IRE1α*<sup>K907A</sup>. Data are presented as mean ± SD relative to *scramble* control, *n*=3. **E.** RT-qPCR analysis of *Bloc1s1*, *Scara3*, *Hgsnat*, *Prom1*, *Vwa5a* and *Txnip* expression in *iKras*<sup>P</sup> cells in the presence (+Dox) or absence (-Dox) of *Kras*<sup>G12D</sup> for 2 days or in *iKras*<sup>R</sup> cell cultured without doxycycline (Dox). Data are presented as mean ± SD relative to *Actb*, *n*=3. **F.** RT-qPCR analysis of *Bloc1s1*, *Scara3*, *Hgsnat*, *Prom1*, *Vwa5a* and *Txnip* expression in *iKras*<sup>P</sup> cells infected with lentiviruses encoding *scramble* shRNA (shScr) or *Ire1a* shRNA (shIre1a). Data are presented as mean ± SD relative to *Actb*, *n*=3. **G-H.** Representative images (**G**) and quantification (**H**) of PROTEOSTAT (magenta) and DAPI (blue) staining in *iKras*<sup>R</sup> cells infected with lentiviruses encoding *scramble* shRNA (shScr) or *Ire1a* shRNA (shIre1a) in the presence or absence of XBP1s. Data represent the average fluorescence intensity of PROTEOSTAT/cell from each image acquired (>10 cells per image) and presented as mean ± SD from *n*=10 images. Scale bar: 20μm. **I.** Colony formation assay in *iKras*<sup>R</sup> cells infected with lentiviruses encoding *scramble* shRNA (shScr) or *Ire1a* shRNA (shIre1a) in the presence or absence of XBP1s. Data are presented as mean ± SD, *n*=3. **J.** Immunoblot of IRE1α or spliced XBP1 protein (XBP1s) in whole-cell lysates of *iKras*<sup>P</sup> and *iKras*<sup>R</sup> cells expressing Cas9 (*iKras*-Cas9) and infected with lentiviruses encoding double gRNA targeting the same exon of *Xbp1* or *Ire1a*. Cells were treated with tunicamycin (5 μg/mL) for 6 h before harvest. **K.** Quantification of PROTEOSTAT intensity in *Ire1a* or *Xbp1* knock-out (KO) *iKras*<sup>P</sup> or *iKras*<sup>R</sup> cells. Data represent the average fluorescence intensity of PROTEOSTAT/cell from each image acquired (>10 cells per image) and are presented as mean ± SD from *n*≥9 images. Ordinary one-way ANOVA (**C**, **D**, **E**, **H**, **I** and **K**) and 2-tailed, unpaired Student's *t* test (**F**) was used to calculate *P* values. n.s., not significant, \* *P*<0.05, \*\* *P*<0.01, \*\*\* *P*<0.001, \*\*\*\* *P*<0.0001.

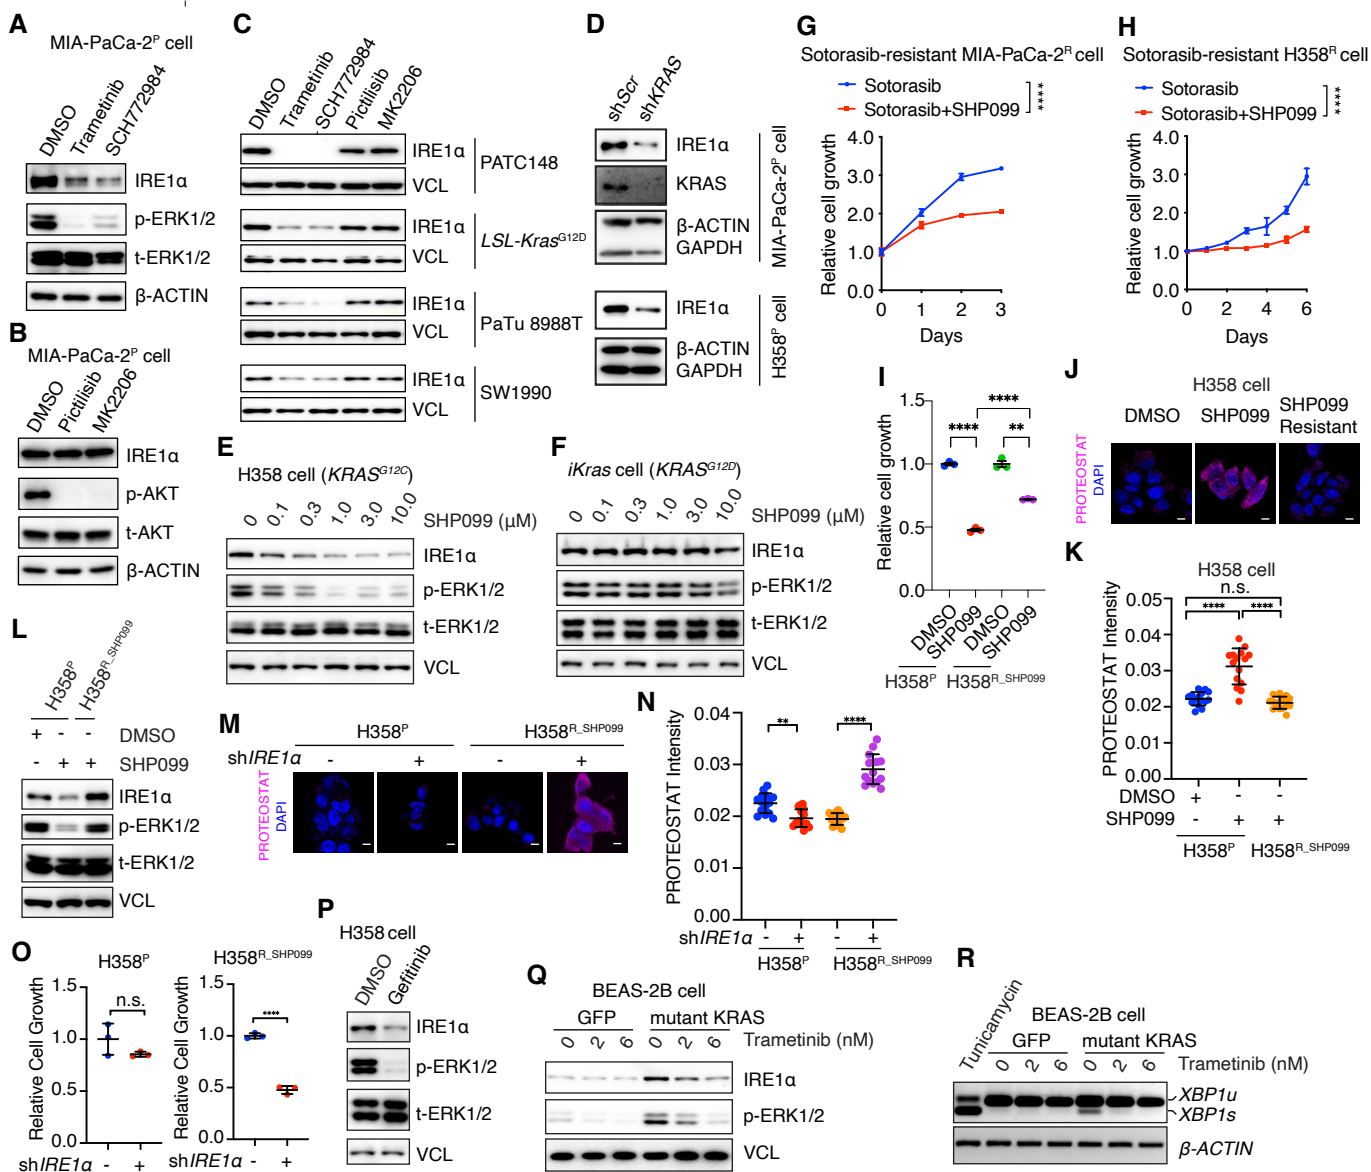

**Figure S6. Regulation of IRE1 $\alpha$  by KRAS-MAPK signaling and its upstream regulators**

**A.** Immunoblot of IRE1 $\alpha$ , t-ERK1/2, and p-ERK1/2 in whole-cell lysates of MIA-PaCa-2<sup>P</sup> cells treated with DMSO, 20 nM trametinib, or 0.3  $\mu$ M SCH772984 for 2 days.  $\beta$ -ACTIN in whole-cell lysates served as loading control. **B.** Immunoblot of IRE1 $\alpha$ , t-AKT, and p-AKT in whole-cell lysates of MIA-PaCa-2<sup>P</sup> cells treated with DMSO, 1  $\mu$ M pictilisib, or 2  $\mu$ M MK2206 for 2 days.  $\beta$ -ACTIN in whole-cell lysates served as loading control. **C.** Immunoblot of IRE1 $\alpha$  in whole-cell lysates of PATC148, *LSL-Kras*<sup>G12D</sup>, PaTu 8988T, and SW1990 cells treated with DMSO, 20 nM trametinib, 1  $\mu$ M SCH772984, 2  $\mu$ M MK2206 or 1  $\mu$ M pictilisib for 2 days. VCL in whole-cell lysates served as loading control. **D.** Immunoblot of IRE1 $\alpha$  in whole-cell lysates of MIA-PaCa-2<sup>P</sup> or H358<sup>P</sup> cells infected with lentiviruses encoding shScr or shKRAS.  $\beta$ -ACTIN and GAPDH in whole-cell lysates served as loading control. **E.** Immunoblot of IRE1 $\alpha$ , total ERK1/2 (t-ERK1/2), and phospho-ERK1/2 (p-ERK1/2) in whole-cell lysates of H358 cells treated with DMSO, or different doses of SHP2 inhibitor SHP099 (0.1-10  $\mu$ M) for 2 days. VCL in whole-cell lysates served as loading control. **F.** Immunoblot of IRE1 $\alpha$ , total ERK1/2 (t-ERK1/2), and phospho-ERK1/2 (p-ERK1/2) in whole-cell lysates of *iKras*<sup>G12D</sup> cells treated with DMSO, or different doses of SHP099 (0.1-10  $\mu$ M) for 2 days. VCL in whole-cell lysates served as loading control. **G-H.** Quantification of cell growth of sotorasib-resistant MIA-PaCa-2<sup>R</sup> (**G**) or H358<sup>R</sup> (**H**) cells treated with 30 nM sotorasib plus DMSO or 1  $\mu$ M SHP099 for indicated time points using CCK-8 assay. Data are normalized to the OD450 at day 0 and presented as mean  $\pm$  SD,  $n=3$ . **I.** Quantification of cell growth of parental (H358<sup>P</sup>) and SHP099-resistant H358 cells (H358<sup>R\_SHP099</sup>) treated with DMSO or 25  $\mu$ M SHP099 for 4 days using CCK-8 assay. Data are normalized to the OD450 of DMSO treated H358<sup>P</sup> group and presented as mean  $\pm$  SD,  $n=3$ . **J-K.** Representative images (**J**) and quantification (**K**) of PROTEOSTAT intensity in H358<sup>P</sup> cells treated with DMSO or 0.3  $\mu$ M SHP099 for 4 days or in the SHP099-resistant H358<sup>R\_SHP099</sup> cells. Data represent the average fluorescence intensity of PROTEOSTAT/cell from each image acquired (>10 cells per image) and are presented as mean  $\pm$  SD from  $n=15$  images. **L.** Immunoblot of IRE1 $\alpha$ , total ERK1/2 (t-ERK1/2), and phospho-ERK1/2 (p-ERK1/2) in whole-cell lysates of H358<sup>P</sup> treated with DMSO or SHP099 (0.3  $\mu$ M) for 2 days or SHP099-resistant H358<sup>R\_SHP099</sup> cells treated with 0.3  $\mu$ M SHP099. VCL in whole-cell lysates served as loading control. **M-N.** Representative images (**M**) and quantification (**N**) of PROTEOSTAT intensity in H358<sup>P</sup> or SHP099-resistant H358<sup>R\_SHP099</sup> cells infected with lentiviruses encoding shScr or shIRE1 $\alpha$ . Data represent the average fluorescence intensity of PROTEOSTAT/cell from each image acquired (>10 cells per image) and are presented as mean  $\pm$  SD from  $n=15$  images. **O.** Colony formation assay was used to quantify the growth of H358<sup>P</sup> or SHP099-resistant H358<sup>R\_SHP099</sup> cells infected with lentiviruses encoding shScr or shIRE1 $\alpha$ . Data are presented as mean  $\pm$  SD relative to shScr control,  $n=3$ . **P.** Immunoblot of IRE1 $\alpha$ , total ERK1/2 (t-ERK1/2), and phospho-ERK1/2 (p-ERK1/2) in whole-cell lysates of H358 cells treated with DMSO or gefitinib (EGFR inhibitor, 1  $\mu$ M) for 2 days. VCL in whole-cell lysates served as loading control. **Q.** Immunoblot of IRE1 $\alpha$  and p-ERK1/2 in whole-cell lysates of BEAS-2B cells expressing GFP or mutant KRAS treated with DMSO or increasing doses of trametinib for 2 days. VCL in whole-cell lysates served as loading control. **R.** RT-PCR analysis of *XBP1* splicing in BEAS-2B cells expressing GFP or mutant KRAS treated with DMSO or increasing doses of trametinib for 2 days. 293T cells treated with tunicamycin (5  $\mu$ g/mL) for 6 hours served as positive control.  $\beta$ -Actin served as loading control. Ordinary one-way ANOVA (**I**, **K** and **N**), Two-way ANOVA test (**G** and **H**), and 2-tailed, unpaired Student's t test (**O**) was used to calculate *P* values. n.s., not significant, \* *P* < 0.05, \*\* *P* < 0.01, \*\*\* *P* < 0.001, \*\*\*\* *P* < 0.0001.



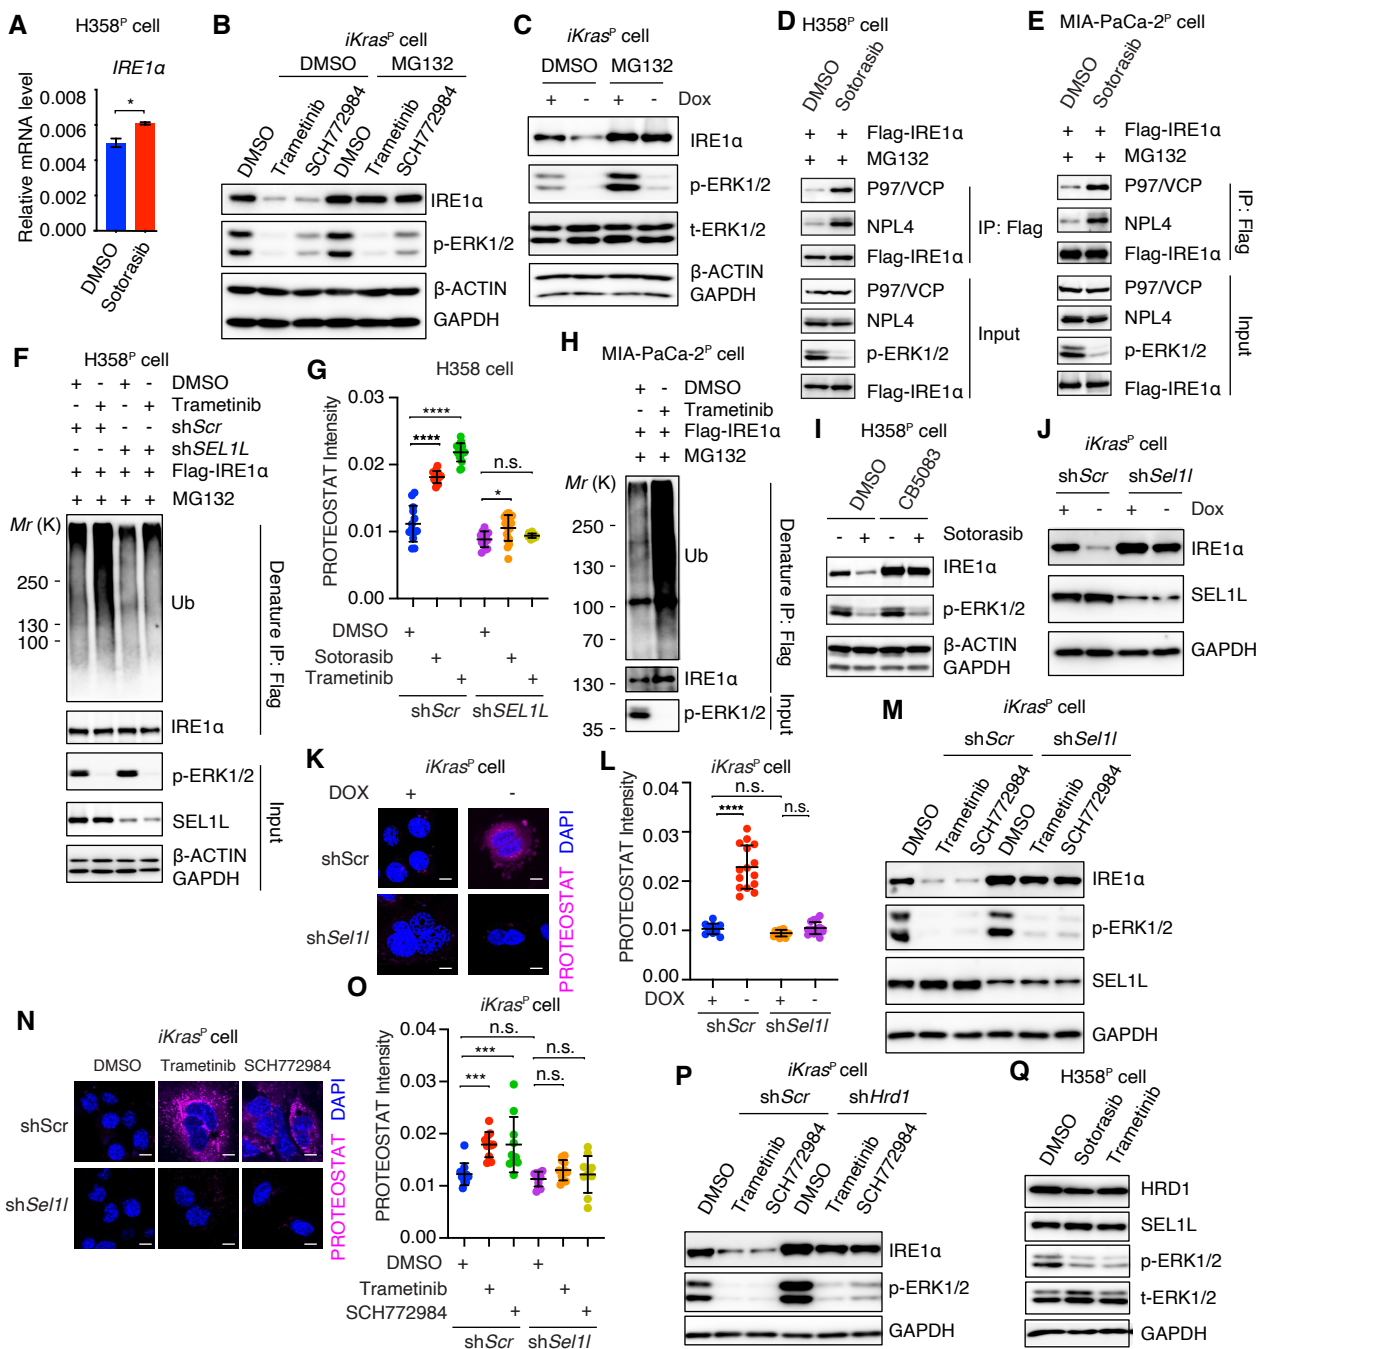

**Figure S7. Oncogenic KRAS-MEK-ERK pathway regulates IRE1α protein stability**

**A.** RT-qPCR analysis of IRE1α in H358<sup>P</sup> cells treated with DMSO or 30nM sotorasib for 2 days. Data are presented relative to *ACTIN* and shown as mean ± SD, n=3. The data are representative of 3 independent experiments. **B.** Immunoblot of IRE1α and p-ERK1/2 in whole-cell lysates of iKras<sup>P</sup> cells treated with DMSO, 20 nM trametinib or 1 μM SCH772984 for 2 days. Cells were treated with DMSO or 3 μM MG132 for 12h before harvest. β-ACTIN and GAPDH in whole-cell lysates served as loading control. **C.** Immunoblot of IRE1α in whole-cell lysates of iKras<sup>P</sup> cells in the presence or absence of Dox (Off Dox) for 2 days. Cells were treated with DMSO or 3 μM MG132 12h before collection. β-ACTIN and GAPDH in whole-cell lysates served as loading control. **D.** Whole-cell lysates of H358 cells expressing Flag-IRE1α and treated with DMSO or sotorasib (30 nM) for 2 days were subjected to immunoprecipitation (IP) with anti-Flag M2 agarose beads, followed by immunoblot to detect interaction between P97/NPL4 and IRE1α. MG132 (1 μM) was added into the culture medium 12 h before harvest. **E.** Whole-cell lysates of MIA-PaCa-2 cells expressing Flag-IRE1α and treated with DMSO or sotorasib (30 nM) for 2 days were subjected to immunoprecipitation (IP) with anti-Flag M2 agarose beads, followed by immunoblot to detect interaction between P97/NPL4 and IRE1α. MG132 (1 μM) was added into the culture medium 12 h before harvest. **F.** Trametinib promotes SEL1L-dependent IRE1α ubiquitination. H358<sup>P</sup> cells expressing Flag-IRE1α were infected with lentivirus encoding shScr or shSEL1L and treated with DMSO or 20 nM trametinib for 2 days. Cells were treated with 1 μM MG132 overnight before harvest. Denature immunoprecipitation (IP) was performed with anti-Flag M2 agarose beads followed by immunoblot to detect IRE1α ubiquitination. **G.** Quantification of PROTEOSTAT intensity in H358 cells infected with lentiviruses encoding shScr or shSEL1L and treated with DMSO, 30 nM sotorasib or 20 nM trametinib for 2 days. Data represent the average fluorescence intensity of PROTEOSTAT/cell from each image acquired and presented as mean ± SD from n=13 images. **H.** Trametinib promotes IRE1α ubiquitination in MIA-PaCa-2 cells expressing empty vector or Flag-IRE1α and treated with DMSO or 20 nM trametinib for 2 days. Cells were treated with 3 μM MG132 12h before collection. Denature immunoprecipitation (IP) was performed with anti-Flag M2 agarose beads followed by immunoblot to detect IRE1α ubiquitination. **I.** Immunoblot of IRE1α and p-ERK1/2 in whole-cell lysates of H358 cells treated with DMSO or 30 nM sotorasib for 2 days. Cells were treated with 1 μM CB5083 (P97 inhibitor) for 12h before harvest. β-ACTIN and GAPDH in whole-cell lysates served as loading control. **J.** Immunoblot of IRE1α in whole-cell lysates of iKras<sup>P</sup> cells infected with lentiviruses encoding shScr or shSel11 and cultured in the presence or absence of Dox (Off Dox) for 2 days. **K-L.** Representative images (**K**) and quantification (**L**) of PROTEOSTAT and DAPI staining in iKras<sup>P</sup> cells infected with lentiviruses encoding shScr or shSel11 and cultured in the presence or absence of Dox for 2 days. Data represent the average fluorescence intensity of PROTEOSTAT/cell from each image acquired and presented as mean ± SD from n=11 images. Scale bar: 20 μm. **M.** Immunoblot of IRE1α in whole-cell lysates of iKras<sup>P</sup> cells infected with lentiviruses encoding shScr or shSel11 and treated with DMSO, 20 nM trametinib or 1 μM SCH772984 for 2 days. GAPDH in whole-cell lysates served as loading control. **N-O.** Representative images (**N**) and quantification (**O**) of PROTEOSTAT and DAPI staining in iKras<sup>P</sup> cells infected with lentiviruses encoding shScr or shSel11 and treated with DMSO, 20 nM trametinib or 1 μM SCH772984 for 2 days. Data represent the average fluorescence intensity of PROTEOSTAT/cell from each image acquired and presented as mean ± SD from n=10 images. Scale bar: 20 μm. **P.** Immunoblot of IRE1α in whole-cell lysates of iKras<sup>P</sup> cells infected with lentiviruses encoding shScr or shHrd1 and treated with DMSO, 20 nM trametinib or 1 μM SCH772984 for 2 days. iKras<sup>P</sup> cells were cultured in the presence of 1 μg/mL Dox to maintain *Kras*<sup>G12D</sup> expression. **Q.** Immunoblot of SEL1L, HRD1, t-ERK1/2 and p-ERK1/2 in whole-cell lysates of parental H358 cells treated with DMSO, 30 nM sotorasib, or 20 nM trametinib for 2 days. GAPDH in whole-cell lysates served as loading control. 2-tailed, unpaired Student's t test (**A**), or ordinary one-way ANOVA (**G**, **L** and **O**) was used to calculate *P* values. n.s., not significant, \* *P*<0.05, \*\* *P*<0.01, \*\*\* *P*<0.001, \*\*\*\* *P*<0.0001.

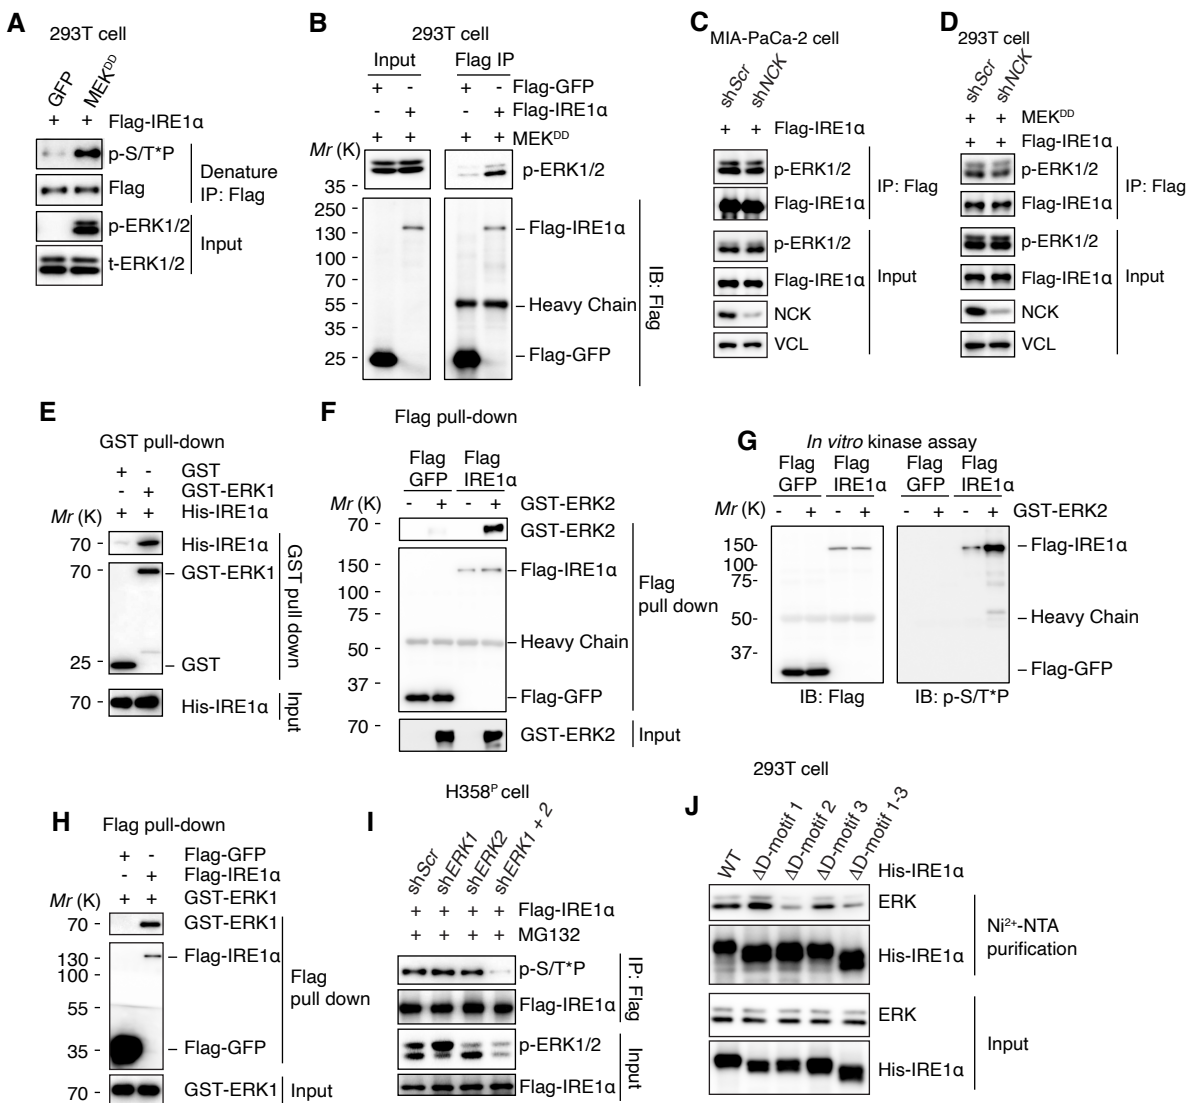

**Figure S8. ERK directly interacts with and phosphorylates IRE1 $\alpha$**

**A.** Constitutively activated MEK (MEK<sup>DD</sup>) promotes IRE1 $\alpha$  phosphorylation. 293T cells expressing Flag-IRE1 $\alpha$  were transfected with GFP or MEK<sup>DD</sup> and subjected to denature immunoprecipitation (IP) with anti-Flag M2 agarose beads, followed by immunoblot with anti-phospho-MAPK substrates motif (S/T\*P) antibody (p-S/T\*P) to detect IRE1 $\alpha$  phosphorylation. **B.** Whole-cell lysates of 293T cells transfected with MEK<sup>DD</sup> together with Flag-GFP or Flag-IRE1 $\alpha$  plasmids were subjected to immunoprecipitation (IP) with anti-Flag M2 agarose beads, followed by immunoblot to detect interaction between phospho-ERK1/2 and IRE1 $\alpha$ . IB, immunoblot. **C.** Depletion of *NCK* had no impact on phospho-ERK1/2 levels and the interaction between IRE1 $\alpha$  and ERK1/2 in MIA-PaCa-2 cells. MIA-PaCa-2 cells expressing Flag-IRE1 $\alpha$  were infected with lentiviruses encoding *scramble* shRNA (shScr) or *NCK* shRNA (shNCK). The whole cell lysates were subjected to immunoprecipitation (IP) with anti-Flag M2 agarose beads. VCL in whole-cell lysates served as loading control. **D.** Depletion of *NCK* had no impact on phospho-ERK1/2 levels and the interaction between IRE1 $\alpha$  and MEK<sup>DD</sup>-activated ERK1/2 in 293T cells. 293T cells expressing Flag-IRE1 $\alpha$  and MEK<sup>DD</sup> were infected with lentiviruses encoding *scramble* shRNA (shScr) or *NCK* shRNA (shNCK). The whole cell lysates were subjected to immunoprecipitation (IP) with anti-Flag M2 agarose beads. VCL in whole-cell lysates served as loading control. **E.** GST pull-down assay was performed using recombinant His-tagged IRE1 $\alpha$  protein purified from Sf9 cells and GST-ERK1 protein purified from *E. coli*. Immunoblot was performed to detect the interaction between GST-ERK1 and His-IRE1 $\alpha$ . **F.** Flag pull-down assay using Flag-GFP or Flag-IRE1 $\alpha$  purified from 293T cells and recombinant GST-ERK2 protein. **G.** *In vitro* kinase assay using Flag-GFP or Flag-IRE1 $\alpha$  proteins purified from 293T cells and recombinant GST-ERK2 protein in the presence of ATP. Denature IP was performed to purify Flag-GFP or Flag-IRE1 $\alpha$ , followed by immunoblot to detect phosphorylation using anti-phospho-MAPK substrates motif (S/T\*P) antibody (p-S/T\*P). IB, Immunoblot. **H.** Flag pull-down assay using Flag-GFP or Flag-IRE1 $\alpha$  purified from 293T cells and recombinant GST-ERK1 protein. Immunoblot was performed to detect the interaction between GST-ERK1 and Flag-IRE1 $\alpha$ . **I.** H358<sup>P</sup> cells expressing Flag-IRE1 $\alpha$  were infected with lentiviruses encoding *scramble* shRNA (shScr), *ERK1* shRNA (shERK1), *ERK2* shRNA (shERK2), or shERK1 plus shERK2. The whole lysates were then subjected to denature IP with anti-Flag M2 agarose beads. The immunoblot was probed with anti-phospho-MAPK substrates motif (S/T\*P) antibody (p-S/T\*P) to detect IRE1 $\alpha$  phosphorylation. MG132 (1  $\mu$ M) was added into the culture medium 12h before harvest. **J.** Whole-cell lysates of 293T cells transfected with MEK<sup>DD</sup> together with His-tagged WT or mutant IRE1 $\alpha$  (with indicated D-motif deletion) were subjected to immunoprecipitation (IP) with Ni<sup>2+</sup>-NTA agarose, followed by immunoblot to detect interaction between ERK1/2 and IRE1 $\alpha$ .

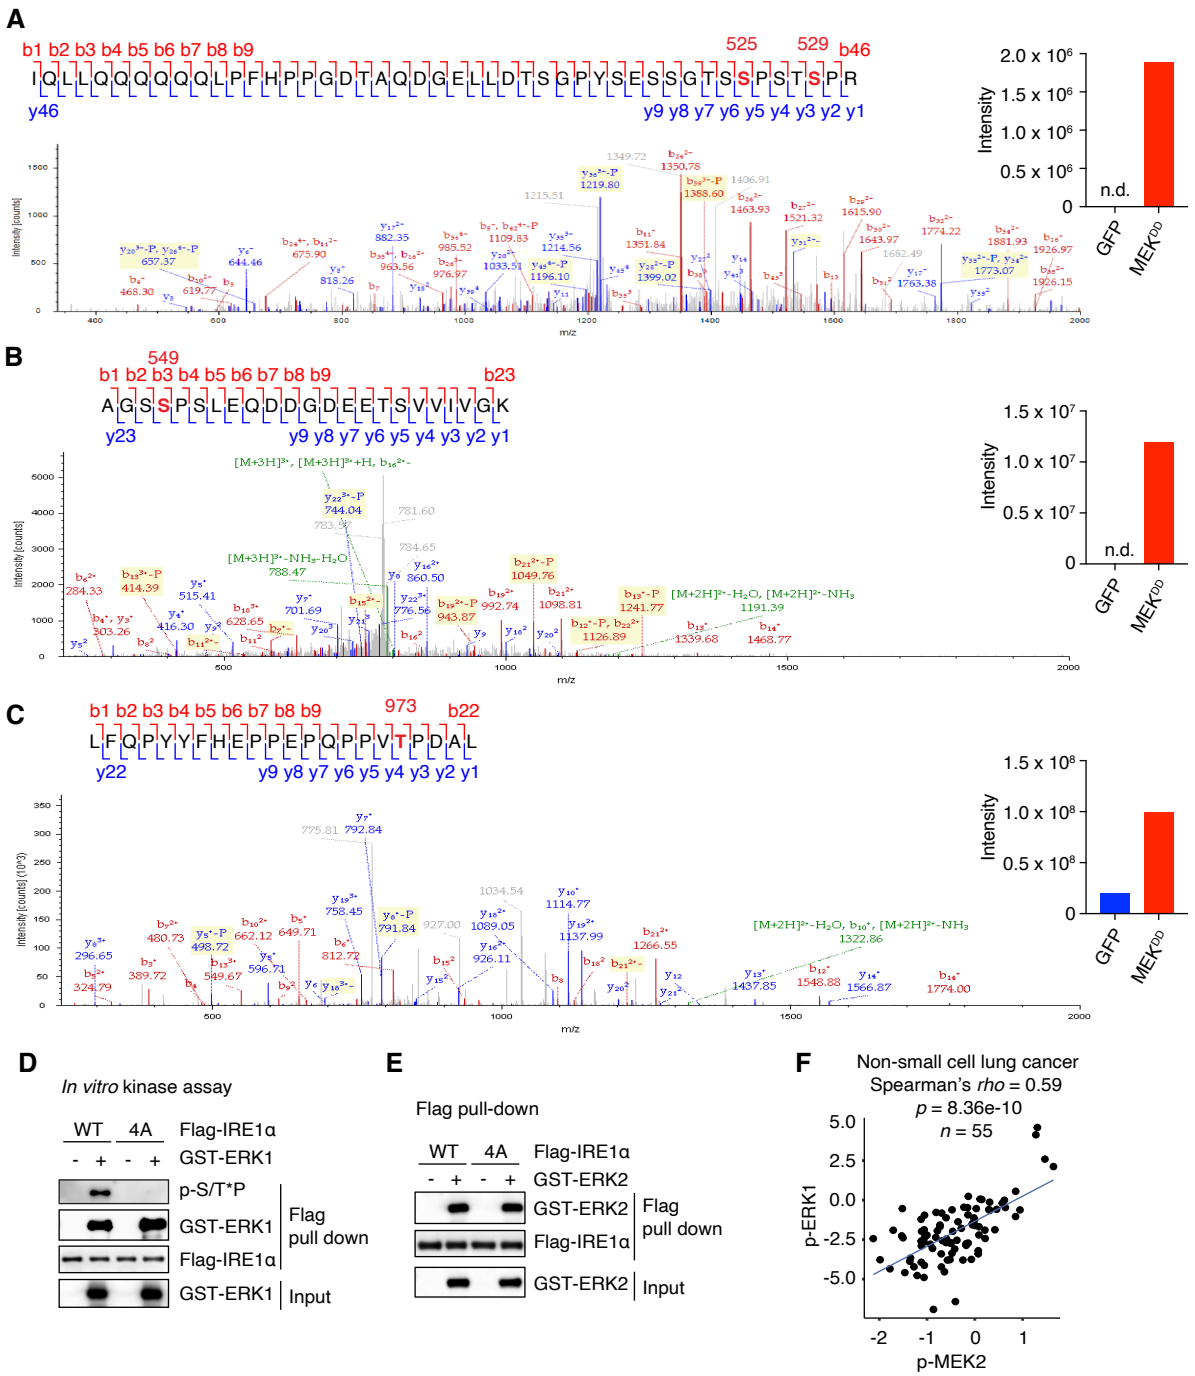

**Figure S9. ERK phosphorylates IRE1 $\alpha$  at S525, S529, S549 and T973**

**A-C.** Liquid Chromatography with tandem mass spectrometry (LC-MS/MS) spectra and intensity of phosphor-peptides of IRE1 $\alpha$  covering S525, 529 (**A**), S549 (**B**) and T973 (**C**) in 293T cells overexpressing GFP or MEK<sup>D0</sup>. **D.** *In vitro* kinase assay using equal amount of Flag-tagged WT or phospho-deficient IRE1 $\alpha$  mutant proteins (4A: S525A, S529A, S549A, T973A) purified from 293T cells and recombinant GST-ERK1 in the presence of ATP. Denature IP was performed to purify Flag-IRE1 $\alpha$ , followed by immunoblot to detect IRE1 $\alpha$  phosphorylation with anti-phospho-MAPK substrates motif (S/T\*P) antibody (p-S/T\*P). **E.** Flag pull-down assay using equal amount of Flag-tagged WT or phospho-deficient (4A) IRE1 $\alpha$  mutant proteins purified from 293T cells and recombinant GST-ERK2 protein to detect interaction between IRE1 $\alpha$  and ERK2. **F.** Spearman correlation between p-ERK1 and p-MEK2 in 55 patients with non-small cell lung cancer, Spearman  $\rho = 0.59$ ,  $p = 8.36 \times 10^{-10}$ ,  $n = 55$ . Phosphoproteomics data are from PDC000149.



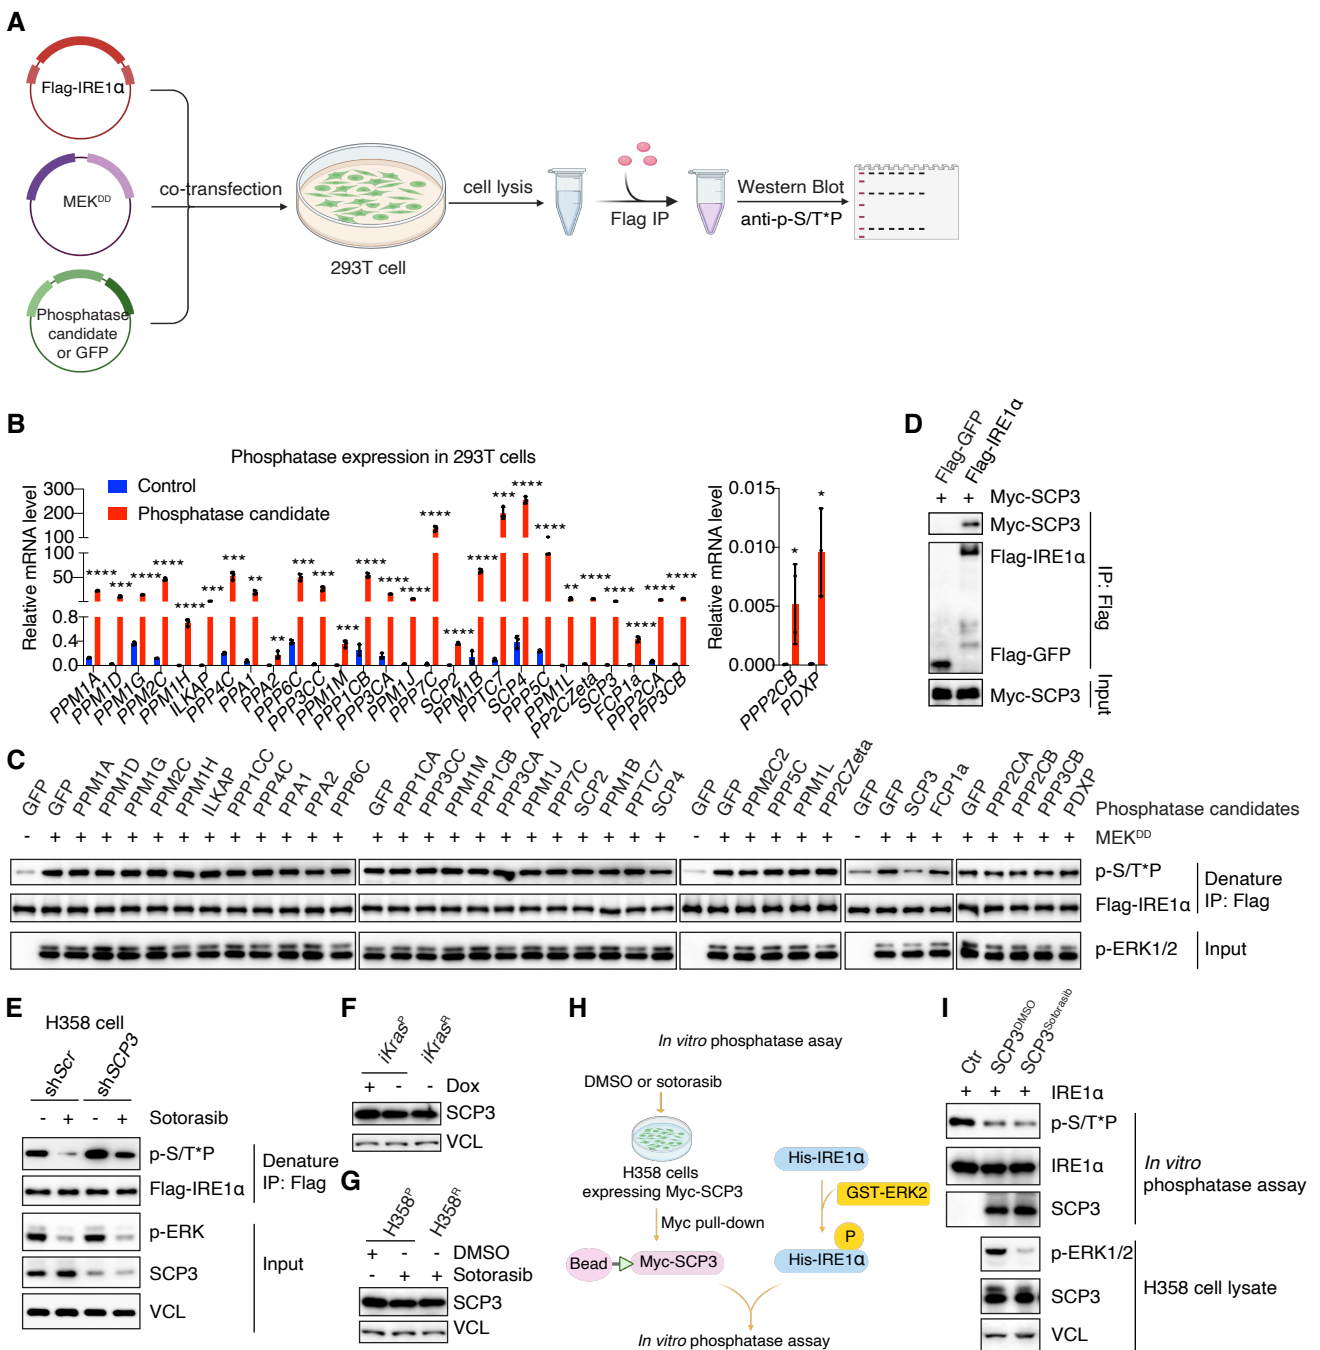

**Figure S11. Identification of SCP3 as the phosphatase regulating IRE1α phosphorylation**

**A.** Schematic illustration of the screen assay to identify phosphatase regulating ERK-mediated IRE1α phosphorylation. 293T cells expressing Flag-IRE1α were transfected with GFP or MEK<sup>DD</sup> plus individual serine/threonine phosphatase candidate. The whole cell lysates were then subjected to denature immunoprecipitation (IP) with anti-Flag M2 agarose beads, followed by immunoblot with anti-phospho-MAPK substrates motif (S/T\*P) antibody (p-S/T\*P) to detect IRE1α phosphorylation. **B.** RT-qPCR analysis individual serine/threonine phosphatase candidate expression as described in **A**. RNAs extracted from GFP-expressing 293T cells was used as control. Expression was normalized to  $\beta$ -ACTIN. Data are presented as mean  $\pm$  SD,  $n=3$ . **C.** Impact of individual phosphatase candidates on ERK-mediated IRE1α phosphorylation. **D.** Whole-cell lysates of 293T cells transfected with Myc-SCP3 together with Flag-GFP or Flag-IRE1α plasmids were subjected to immunoprecipitation (IP) with anti-Flag M2 agarose beads, followed by immunoblot to detect interaction between Myc-SCP3 and IRE1α. **E.** Control (shScr) or SCP3-knockdown (shSCP3) H358 cells expressing Flag-IRE1α were treated with DMSO or 30 nM sotorasib for 2 hours and subjected to denature IP with anti-Flag M2 agarose beads. The immunoblot was probed with anti-phospho-MAPK substrates motif (S/T\*P) antibody (p-S/T\*P) to detect IRE1α phosphorylation. **F.** Immunoblot of SCP3 in whole-cell lysates of *iKras*<sup>fl</sup> cells in the presence (+Dox) or absence (-Dox) of *Kras*<sup>G12D</sup> for 2 days or in *iKras*<sup>fl</sup> cells cultured in the absence of Dox. VCL served as loading control. **G.** Immunoblot of SCP3 in whole-cell lysates of parental H358 (H358<sup>R</sup>) cells treated with DMSO or 30 nM sotorasib for 2 days or in the sotorasib-resistant H358<sup>R</sup> cells treated with 30nM sotorasib. VCL served as loading control. **H-I.** Schematic illustration (**H**) and results (**I**) of *in vitro* phosphatase assay using Myc-SCP3 purified from H358 cells treated with DMSO or sotorasib (30 nM) for 2 days. Recombinant IRE1α protein phosphorylated by recombinant ERK2 *in vitro* were subjected to *in vitro* phosphatase assay with equal amount of Myc-SCP3 purified from H358 cells treated with DMSO or sotorasib (30 nM) for 2 days, followed by immunoblot with anti-phospho-MAPK substrates motif (S/T\*P) antibody (p-S/T\*P) to detect IRE1α phosphorylation. 2-tailed, unpaired Student's *t* test (**B**) was used to calculate *P* values. \* *P* < 0.05, \*\**P* < 0.01, \*\*\**P* < 0.001, \*\*\*\**P* < 0.0001.

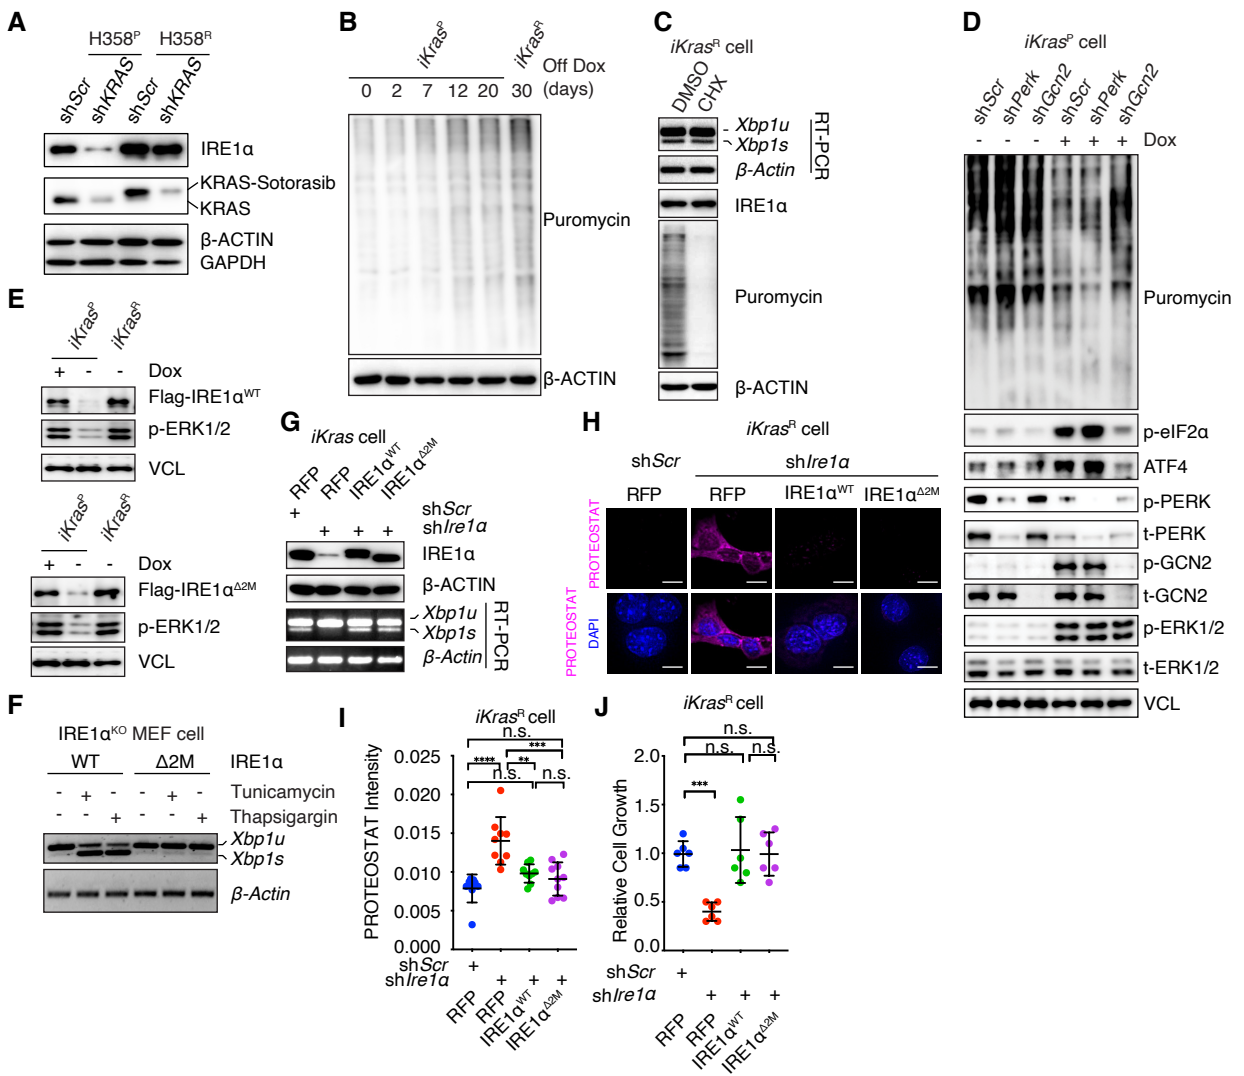

**Figure S12. IRE1α is reactivated in an ER stress independent manner.**

**A.** Immunoblot of IRE1α and KRAS in whole-cell lysates of H358<sup>R</sup> and H358<sup>P</sup> cells infected with lentiviruses encoding shSCR or shKRAS. β-ACTIN and GAPDH in whole-cell lysates served as loading control. **B.** Immunoblot of puromycin in whole-cell lysates of parental *iKras* cells (*iKras<sup>fl</sup>*) at different time points after *Kras<sup>G12D</sup>* inactivation by Dox-withdrawal (Off Dox) until the cells acquired resistance to *Kras<sup>G12D</sup>* inactivation (*iKras<sup>R</sup>* cell). Cells were treated with 2 μg/mL puromycin 15 min before collection. β-ACTIN in whole-cell lysates served as loading control. **C.** RT-PCR analysis of *XBP1* splicing and immunoblot of IRE1α and puromycin in whole-cell lysates of *iKras<sup>R</sup>* cells treated with cycloheximide (CHX, 5μg/ml). β-ACTIN in whole-cell lysates served as loading control. **D.** Immunoblot of phospho-PERK, total-PERK, phospho-GCN2, total-GCN2, phospho-ERK1/2, total-ERK1/2, phospho-eIF2α, ATF4, and puromycin in whole-cell lysates of *iKras<sup>R</sup>* cells infected with lentiviruses encoding *scramble* shRNA (shScr), *Perk* shRNA (shPerk), or *Gcn2* shRNA (shGcn2). The *iKras<sup>R</sup>* cells were cultured in the absence of Dox before adding Dox for 2 days prior to western blot analysis. Cells were treated with 2 μg/mL puromycin 15 min before collection. VCL in whole-cell lysates served as loading control. **E.** Immunoblot of Flag-IRE1α<sup>WT</sup> or Flag-IRE1α<sup>Δ2M</sup> in whole-cell lysates of parental *iKras<sup>fl</sup>* cells in the presence (+Dox) or absence (-Dox) of *Kras<sup>G12D</sup>* for 2 days or in *iKras<sup>R</sup>* cell cultured without doxycycline (Dox). Vinculin (VCL) in whole-cell lysates served as loading control. **F.** Validation of ER stress-sensing deficient IRE1α<sup>Δ2M</sup> mutant. RT-PCR analysis of *Xbp1* splicing in control (shScr) *iKras* cells or *Ire1a*-knockdown *iKras* cells reconstituted with shRNA-resistant IRE1α<sup>WT</sup> or IRE1α<sup>Δ2M</sup>. β-ACTIN served as loading control. **G.** Examination of IRE1α protein levels and *Xbp1* splicing in control (shScr) *iKras* cells or *Ire1a*-knockdown *iKras* cells reconstituted with shRNA-resistant IRE1α<sup>WT</sup> or IRE1α<sup>Δ2M</sup>. β-ACTIN served as loading control. **H-I.** Representative images (**H**) and quantification (**I**) of PROTEOSTAT (magenta) and DAPI (blue) staining in control (shScr) *iKras<sup>R</sup>* cells or *Ire1a*-knockdown *iKras<sup>R</sup>* cells reconstituted with shRNA-resistant IRE1α<sup>WT</sup> or IRE1α<sup>Δ2M</sup>. Data represent the average fluorescence intensity of PROTEOSTAT/cell from each image acquired (>10 cells per image) and presented as mean ± SD from *n*≥9 images. Scale bar: 20μm. **J.** Colony formation assay was used to quantify the growth of control (shScr) *iKras<sup>R</sup>* cells or *Ire1a*-knockdown *iKras<sup>R</sup>* cells reconstituted with shRNA-resistant IRE1α<sup>WT</sup> or IRE1α<sup>Δ2M</sup>. Data are presented as mean ± SD relative to scramble control, *n*=6. Ordinary one-way ANOVA (**I** and **J**) were used to calculate *P* values. n.s., not significant, \*\**P* < 0.01, \*\*\**P* < 0.001, \*\*\*\**P* < 0.0001.

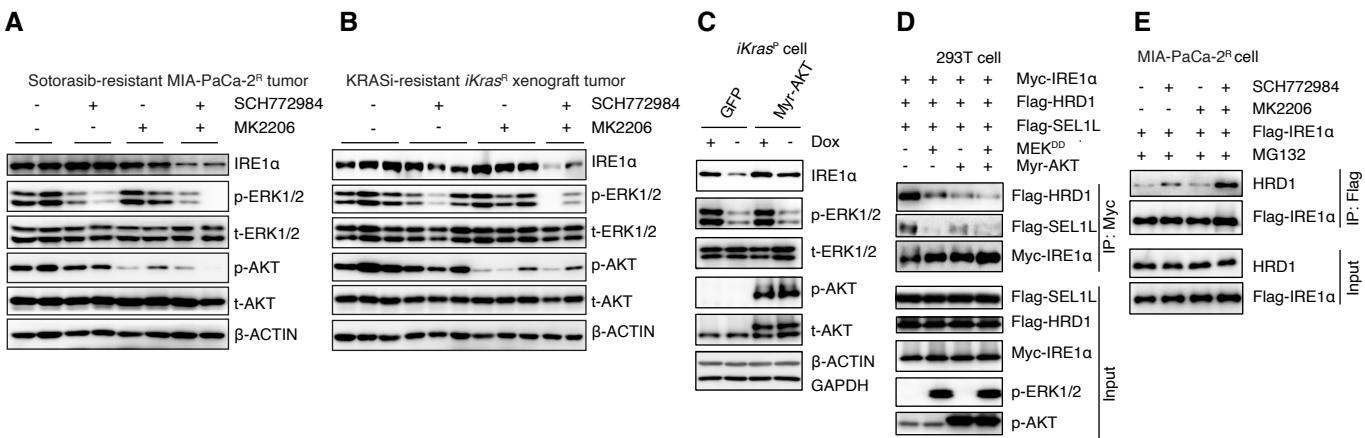

**Figure S13. Multiple resistance mechanisms converge on IRE1α**

**A.** Immunoblot with indicated antibodies in sotorasib-resistant MIA-PaCa-2<sup>R</sup> tumors treated with SCH772984 (50mg/kg) and/or MK2206 (120mg/kg) for 4 days. β-ACTIN in whole-cell lysates served as loading control. **B.** Immunoblot with indicated antibodies in KRASI-resistant *iKras<sup>R</sup>* xenograft tumors treated with SCH772984 (50mg/kg) and/or MK2206 (120mg/kg) for 9 days. β-ACTIN in whole-cell lysates served as loading control. **C.** Immunoblot of IRE1α in whole-cell lysates of *iKras<sup>R</sup>* cells expressing GFP or constitutively activated AKT (myr-AKT) in the presence or absence of Doxycycline (Dox) for 2 days. **D.** 293T cells expressing Myc-IRE1α, Flag-HRD1, and Flag-SEL1L in the presence or absence of MEK<sup>DD</sup> or myr-AKT were subjected to immunoprecipitation with anti-Myc agarose beads followed by immunoblot to detect the interaction between IRE1α and SEL1L or HRD1. **E.** MIA-PaCa-2<sup>R</sup> cells expressing Flag-IRE1α were treated with DMSO, 2μM MK2206, and/or 1 μM SCH772984 for 2 days and subjected to immunoprecipitation with anti-Flag M2 agarose beads followed by immunoblot to detect the interaction between IRE1α and HRD1. Cells were treated with 3μM MG132 for 12h before harvest.

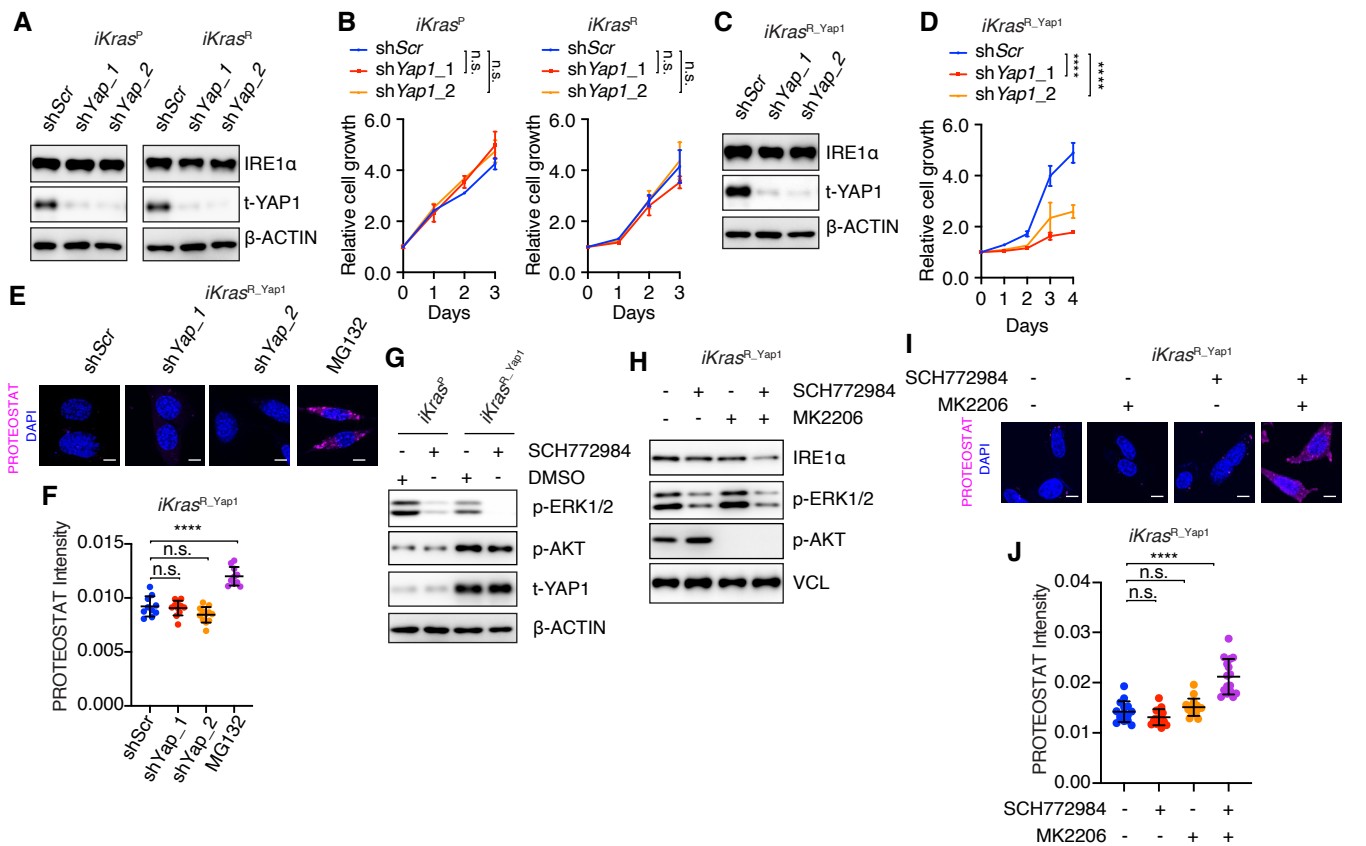

**Figure S14. YAP1 is not involved in proteostasis in *iKras* model.**

**A.** Immunoblot of IRE1 $\alpha$  and YAP1 in whole-cell lysates of *iKras*<sup>P</sup> or *iKras*<sup>R</sup> cells infected with lentiviruses encoding *scramble* shRNA or *Yap1* shRNA. **B.** Quantification of cell growth of *iKras*<sup>P</sup> or *iKras*<sup>R</sup> cells infected with lentiviruses encoding *scramble* shRNA or *Yap1* shRNA for indicated time points using CCK-8 assay. Data are normalized to the OD450 at day 0 and presented as mean  $\pm$  SD,  $n=3$ . **C.** Immunoblot of IRE1 $\alpha$  and YAP1 in whole-cell lysates of control or *Yap-1* knockdown *iKras*<sup>R\_Yap1</sup> cells derived from *iKras* GEMM tumor relapsed after Dox withdrawal. Cells were cultured in the absence of Dox. **D.** Quantification of cell growth of *iKras*<sup>R\_Yap1</sup> cells infected with lentiviruses encoding *scramble* or *Yap1* shRNA for indicated time using CCK-8 assay. Data were normalized to the OD450 at day 0 and presented as mean  $\pm$  SD,  $n=3$ . **E-F.** Representative images (**E**) and quantification (**F**) of PROTEOSTAT and DAPI staining in control or *Yap-1* knockdown *iKras*<sup>R\_Yap1</sup> cells. Cells treated with 5 $\mu$ M MG132 for 16h were used as positive control. Data represent the average fluorescence intensity of PROTEOSTAT/cell from each image acquired and presented as mean  $\pm$  SD from  $n=10$  images. Scale bar: 20 $\mu$ m. **G.** Immunoblots in whole-cell lysates of *iKras*<sup>P</sup> (cultured with Dox) or *iKras*<sup>R\_Yap1</sup> cells (cultured without Dox) treated with DMSO or 1 $\mu$ M SCH772984 for 2 days as indicated. **H.** Immunoblots in whole-cell lysates of *iKras*<sup>R\_Yap1</sup> cells cultured without Dox and treated with DMSO, 1 $\mu$ M SCH772984, and/or 2 $\mu$ M MK2206 for 2 days as indicated. **I-J.** Representative images (**I**) and quantification (**J**) of PROTEOSTAT and DAPI staining in *iKras*<sup>R\_Yap1</sup> cells treated as in (**G**). Data represent the average fluorescence intensity of PROTEOSTAT/cell from each image acquired and presented as mean  $\pm$  SD from  $n=15$  images. Scale bar: 20 $\mu$ m. All *iKras*<sup>R\_Yap1</sup> cells were cultured in the absence of Dox. Ordinary one-way ANOVA with Dunnett's multiple comparisons test (**F** and **J**) or two-way ANOVA with Bonferroni's multiple comparisons test (**B** and **D**) was used to calculate *P* values. n.s., not significant, \*  $P<0.05$ , \*\*  $P<0.01$ , \*\*\*  $P<0.001$ , \*\*\*\*  $P<0.0001$ .



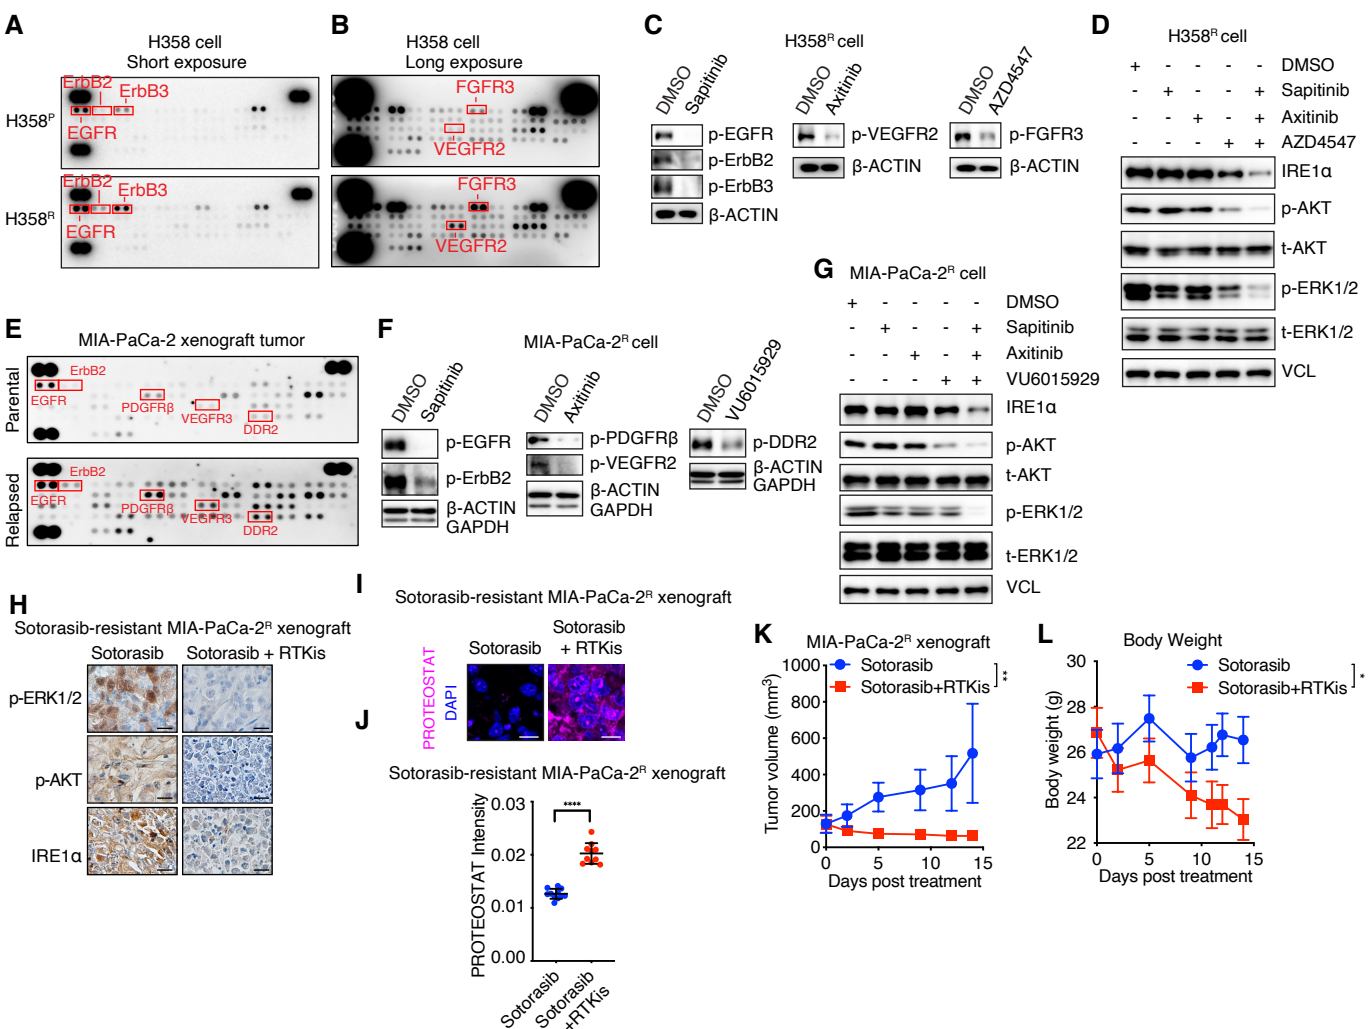

**Figure S15. RTKs drives ERK and AKT activation in sotorasib-resistant tumors.**

**A-B.** Phospho-RTK array of whole-cell lysates from parental H358 cells (H358<sup>P</sup>) or sotorasib-resistant H358 cells (H358<sup>R</sup>) treated with 30nM sotorasib. Short (**A**) and long (**B**) exposure images are shown. **C.** Immunoblot of phospho-EGFR (p-EGFR), phospho-ErbB2 (p-ErbB2), phospho-ErbB3 (p-ErbB3), phospho-VEGFR2 (p-VEGFR), and phospho-FGFR3 (p-FGFR) in whole-cell lysates of H358<sup>R</sup> cells treated with saporitinib (pan-EGFR inhibitor, 1 nM), axitinib (VEGFR inhibitor, 0.3  $\mu$ M), or AZD4547 (FGFR inhibitor, 1  $\mu$ M) for 2 days.  $\beta$ -ACTIN in whole-cell lysates served as loading control. **D.** Immunoblot of IRE1 $\alpha$ , total ERK1/2 (t-ERK1/2), phospho-ERK1/2 (p-ERK1/2), total AKT (t-AKT), and phospho-AKT (p-AKT) in whole-cell lysates of H358<sup>R</sup> cells treated with DMSO, saporitinib (pan-EGFR inhibitor, 1 nM), axitinib (VEGFR inhibitor, 0.3  $\mu$ M), AZD4547 (FGFR inhibitor, 1  $\mu$ M) or combination of three inhibitors for 2 days. Vinculin (VCL) in whole-cell lysates served as loading control. **E.** Phospho-RTK array of parental MIA-PaCa-2 xenograft tumors or sotorasib-resistant MIA-PaCa-2<sup>R</sup> xenograft tumors relapsed after 9 weeks of 100mg/kg sotorasib treatment. **F.** Immunoblot of phospho-EGFR (p-EGFR), phospho-ErbB2 (p-ErbB2), phospho-PDGFR $\beta$  (p-PDGFR $\beta$ ), phospho-VEGFR2 (p-VEGFR), and phospho-DDR2 (p-DDR2) in whole-cell lysates of MIA-PaCa-2<sup>R</sup> cells treated with DMSO, saporitinib (pan-EGFR inhibitor, 1 nM), axitinib (VEGFR inhibitor, 0.3  $\mu$ M), or VU6015929 (DDR inhibitor, 1  $\mu$ M) for 2 days.  $\beta$ -ACTIN and GAPDH in whole-cell lysates served as loading control. **G.** Immunoblot of IRE1 $\alpha$ , total ERK1/2 (t-ERK1/2), phospho-ERK1/2 (p-ERK1/2), total AKT (t-AKT), and phospho-AKT (p-AKT) in whole-cell lysates of MIA-PaCa-2<sup>R</sup> cells treated with DMSO, saporitinib (pan-EGFR inhibitor, 1 nM), axitinib (VEGFR inhibitor, 0.3  $\mu$ M), VU6015929 (DDR inhibitor, 1  $\mu$ M) or combination of three inhibitors for 2 days. Vinculin (VCL) in whole-cell lysates served as loading control. **H.** Immunohistochemical staining of p-ERK1/2, IRE1 $\alpha$  and p-AKT in sotorasib-resistant MIA-PaCa-2<sup>R</sup> xenograft tumors treated with sotorasib (100mg/kg) alone, or sotorasib (100mg/kg) combined with multiple RTK inhibitors (saporitinib, 20mg/kg, axitinib, 50mg/kg, and VU6015929, 3mg/kg) for 3 days. Scale bar: 40 $\mu$ m. **I-J.** Representative images (**I**) and quantification (**J**) of PROTEOSTAT (magenta) and DAPI (blue) staining in sotorasib-resistant MIA-PaCa-2<sup>R</sup> xenograft tumors treated with sotorasib (100mg/kg), or sotorasib (100mg/kg) plus multiple RTK inhibitors (saporitinib, 20mg/kg, axitinib, 50mg/kg, and VU6015929, 3mg/kg) for 3 days. Data represent average fluorescence intensity of PROTEOSTAT/cell from each image acquired and are presented as mean  $\pm$  SD from  $n=12$  images. Scale bar: 20 $\mu$ m. **K.** Tumor volume quantification of established sotorasib-resistant MIA-PaCa-2<sup>R</sup> tumors treated with sotorasib (100mg/kg,  $n=5$ ), or sotorasib (100mg/kg) plus multiple RTK inhibitors (saporitinib, 20mg/kg, axitinib, 50mg/kg, and VU6015929, 3mg/kg,  $n=6$ ). **L.** Body weight of sotorasib-resistant MIA-PaCa-2<sup>R</sup> tumor-bearing SCID/beige mice treated with sotorasib (100mg/kg,  $n=5$ ) or sotorasib (100mg/kg) plus multiple RTK inhibitors (saporitinib, 20mg/kg, axitinib, 50mg/kg, and VU6015929, 3mg/kg,  $n=6$ ). Student's t test (**J**) or Two-way ANOVA with Bonferroni's multiple comparisons test (**K** and **L**) was used to calculate  $P$  values. n.s., not significant, \*  $P < 0.05$ , \*\*  $P < 0.01$ , \*\*\*\*  $P < 0.0001$ .

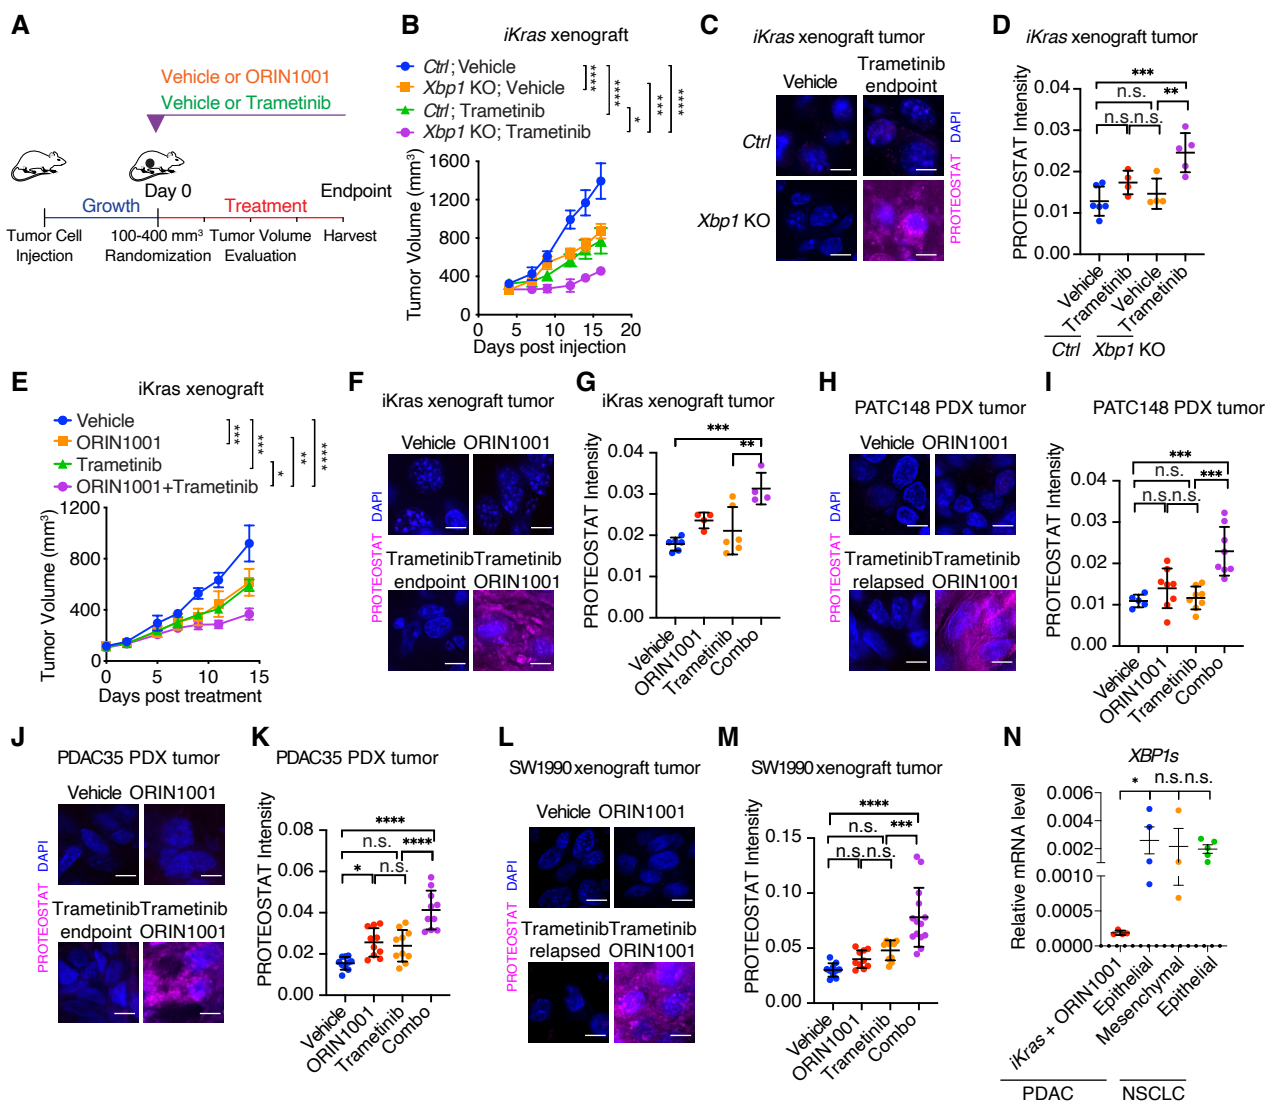

**Figure S16. IRE1 $\alpha$  inhibition sensitizes KRAS-mutant tumors to MEK inhibitor**

**A.** Schematic showing treatment strategy with IRE1 $\alpha$  RNase inhibitor ORIN1001 and/or MEK inhibitor trametinib. **B.** Tumor volume quantification of established *scramble* control (*Ctrl*) or *Xbp1* knock-out (*Xbp1* KO) *iKras* xenograft tumors treated with vehicle or 1mg/kg trametinib ( $n=6$ /group) starting from day 4 post injection. **C-D.** Representative images (**C**) and quantification (**D**) of PROTEOSTAT (magenta) and DAPI (blue) staining in endpoint *scramble* control (*Ctrl*) or *Xbp1* knock-out (*Xbp1* KO) *iKras* xenograft tumors treated with vehicle or MEK inhibitor trametinib (1mg/kg). Data represent average fluorescence intensity of PROTEOSTAT/cell from each tumor acquired and are presented as mean  $\pm$  SD from  $n=4$  (*Ctrl* with trametinib, and *Xbp1* KO with vehicle) or 6 (*Ctrl* with vehicle, and *Xbp1* KO with trametinib) tumors. Scale bar: 20 $\mu$ m. **E.** Tumor volume quantification of established *iKras* xenograft tumors in SCID/beige mice treated with vehicle ( $n=5$ ), ORIN1001 (150 mg/kg,  $n=6$ ), trametinib (1 mg/kg,  $n=5$ ), or ORIN1001 plus trametinib ( $n=5$ ). **F-G.** Representative images (**F**) and quantification (**G**) of PROTEOSTAT (magenta) and DAPI (blue) staining in endpoint *iKras* xenograft tumors treated with vehicle, IRE1 $\alpha$  RNase inhibitor ORIN1001 (150mg/kg), MEK inhibitor trametinib (1mg/kg), or ORIN1001 plus trametinib. Data represent average fluorescence intensity of PROTEOSTAT/cell from each tumor acquired and are presented as mean  $\pm$  SD from  $n=4$  (ORIN1001 and combo) or  $n=6$  (vehicle and trametinib) tumors. Scale bar: 20 $\mu$ m. **H-I.** Representative images (**H**) and quantification (**I**) of PROTEOSTAT (magenta) and DAPI (blue) staining in endpoint PATC148 xenograft tumors treated with vehicle, IRE1 $\alpha$  RNase inhibitor ORIN1001 (150mg/kg), MEK inhibitor trametinib (1mg/kg), or ORIN1001 plus trametinib. Data represent average fluorescence intensity of PROTEOSTAT/cell from each tumor acquired and are presented as mean  $\pm$  SD from  $n=5$  (vehicle) or 8 (ORIN1001, trametinib and combo) tumors. Scale bar: 20 $\mu$ m. **J-K.** Representative images (**J**) and quantification (**K**) of PROTEOSTAT (magenta) and DAPI (blue) staining in endpoint PDAC35 xenograft tumors treated with vehicle, IRE1 $\alpha$  RNase inhibitor ORIN1001 (150mg/kg), MEK inhibitor trametinib (1mg/kg), or ORIN1001 plus trametinib. Data represent average fluorescence intensity of PROTEOSTAT/cell from each image acquired and are presented as mean  $\pm$  SD from  $n=10$  independent images. Scale bar: 20 $\mu$ m. **L-M.** Representative images (**L**) and quantification (**M**) of PROTEOSTAT (magenta) and DAPI (blue) staining in endpoint SW1990 xenograft tumors treated as in (**Fig 6H**). Data represent average fluorescence intensity of PROTEOSTAT/cell from each image acquired and are presented as mean  $\pm$  SD from  $n=10$  independent images. Scale bar: 20 $\mu$ m. **N.** RT-qPCR analysis of *XBP1* splicing in epithelial or mesenchymal-like KRAS-driven PDAC and NSCLC preclinical models. Epithelial PDAC models: *iKras*, PATC53, SW1990 and PDAC19. The *iKras* model (epithelial PDAC model) treated with ORIN1001 served as negative control. Mesenchymal PDAC models: MIA-PaCa-2, PATC148, and PDAC35. Epithelial NSCLC models: J000096652, TM00186, TC303AR, J000093018, and TM00192. Data were presented as mean  $\pm$  SEM (**B** and **E**) or mean  $\pm$  SD (**D**, **G**, **I**, **K**, **M** and **N**). Two-way ANOVA (**B** and **E**) and Ordinary one-way ANOVA (**D**, **G**, **I**, **K**, **M** and **N**) were used to calculate *P* values. n.s., not significant, \*  $P < 0.05$ , \*\*  $P < 0.01$ , \*\*\*  $P < 0.001$ , \*\*\*\*  $P < 0.0001$ .

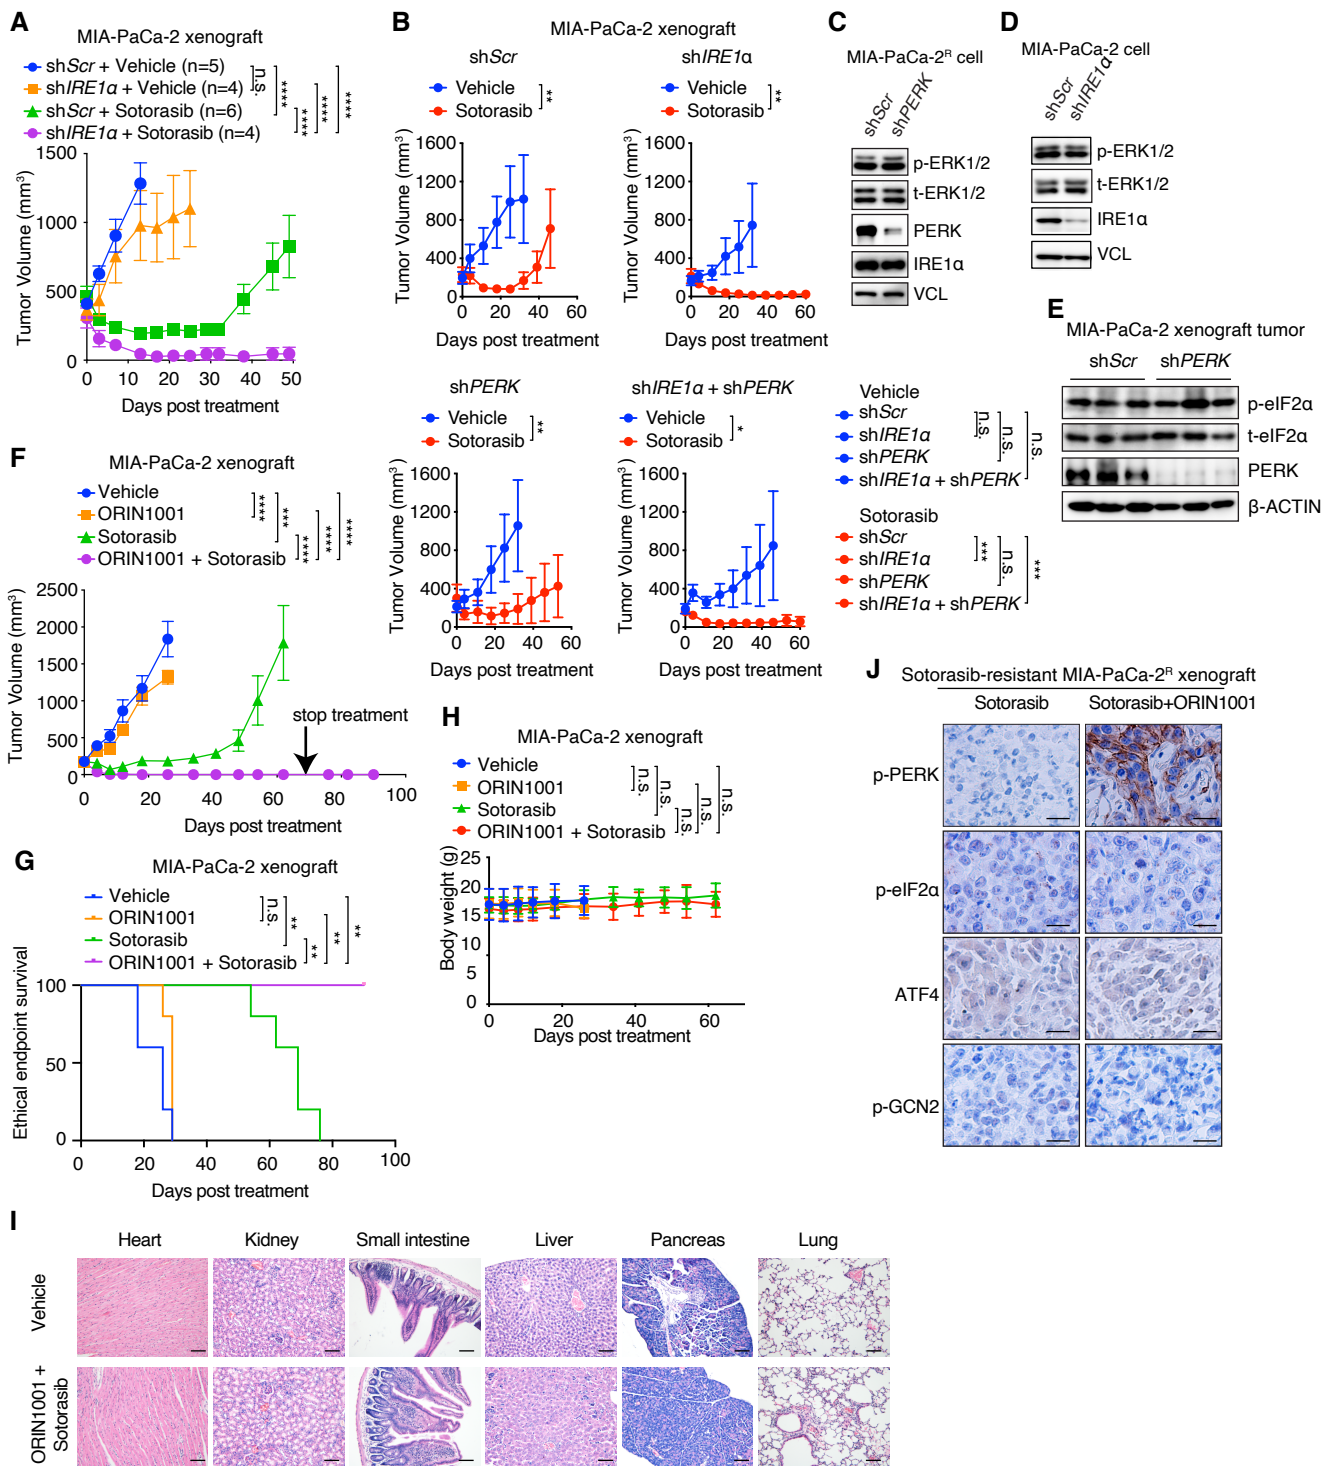

**Figure S17. IRE1 $\alpha$  inhibition sensitizes *KRAS*<sup>G12C</sup>-mutant tumors to KRAS inhibitor.**

**A.** Tumor volume quantification of established MIA-PaCa-2 tumors infected with lentiviruses encoding doxycycline-inducible shSCR or shIRE1 $\alpha$  and treated with vehicle or sotorasib (30mg/kg). When tumor volume reached 350-500 mm<sup>3</sup>, tumor-bearing mice were randomized and treated with 2g/L of doxycycline in drinking water (to induce expression of shRNA) and vehicle or sotorasib. **B.** Tumor volume quantification of established MIA-PaCa-2 tumors expressing doxycycline-inducible shScr, shIRE1 $\alpha$ , shPERK or shIRE1 $\alpha$  plus shPERK. When tumor volume reached 200 mm<sup>3</sup>, tumor-bearing mice were randomized and treated with 2g/L of doxycycline in drinking water (to induce expression of shRNA) and vehicle or sotorasib (100 mg/kg). shScr and shIRE1 data in **(B)** and the data in **Fig.7A** are from the same experiments. **C.** Immunoblot of IRE1 $\alpha$ , phospho-ERK1/2, total-ERK1/2 and PERK in whole-cell lysates of MIA-PaCa-2<sup>R</sup> cells infected with lentiviruses encoding scramble shRNA (shScr) or PERK shRNA (shPERK). VCL in whole-cell lysates served as loading control. **D.** Immunoblot of IRE1 $\alpha$ , phospho-ERK1/2 and total-ERK1/2 in whole-cell lysates MIA-PaCa-2 cells infected with lentiviruses encoding scramble shRNA (shScr) or IRE1 $\alpha$  shRNA (shIRE1 $\alpha$ ). VCL in whole-cell lysates served as loading control. **E.** Immunoblot of t-PERK, phospho-eIF2 $\alpha$  and total-eIF2 $\alpha$  in MIA-PaCa-2 tumors expressing doxycycline-inducible shScr or shPERK.  $\beta$ -ACTIN served as loading control. **F.** Tumor volume quantification of established MIA-PaCa-2 tumors in SCID/beige mice treated with vehicle (n=4), ORIN1001 (300mg/kg, n=5), sotorasib (50mg/kg, n=5), or ORIN1001 plus sotorasib (n=5). Treatment was stopped at day 64. **G.** Kaplan-Meier survival curve of MIA-PaCa-2 tumor-bearing mice under different treatments as indicated in **(F)** from treatment start time. Treatment was stopped at day 64. **H.** Body weight of MIA-PaCa-2 tumor-bearing SCID/beige mice treated with vehicle (n=4), ORIN1001 (300mg/kg, n=5), sotorasib (50mg/kg, n=5), or ORIN1001 plus sotorasib (n=5) as indicated in **F** and **G**. **I.** H&E staining of heart, kidney, small intestine, liver, pancreas and lung of MIA-PaCa-2 tumor-bearing SCID/Beige mice treated as in **F**. Scale bar: 80 $\mu$ m. **J.** Immunohistochemical staining of phospho-PERK, phospho-eIF2 $\alpha$ , ATF4 or phospho-GCN2 in sotorasib-resistant MIA-PaCa-2<sup>R</sup> xenograft tumors treated with sotorasib (100 mg/kg) or sotorasib (100 mg/kg) plus ORIN1001 (300 mg/kg) for 4 days. Scale bar: 40 $\mu$ m. Data are presented as mean  $\pm$  SEM (**A**, **B** and **F**) or mean  $\pm$  SD (**H**). Two-way ANOVA (**A**, **B**, **F** and **H**) or log-rank (Mantel-Cox) test (**G**) was used to calculate *P* values. n.s., not significant, \* *P*<0.05, \*\**P*<0.01, \*\*\**P*<0.001, \*\*\*\**P*<0.0001.

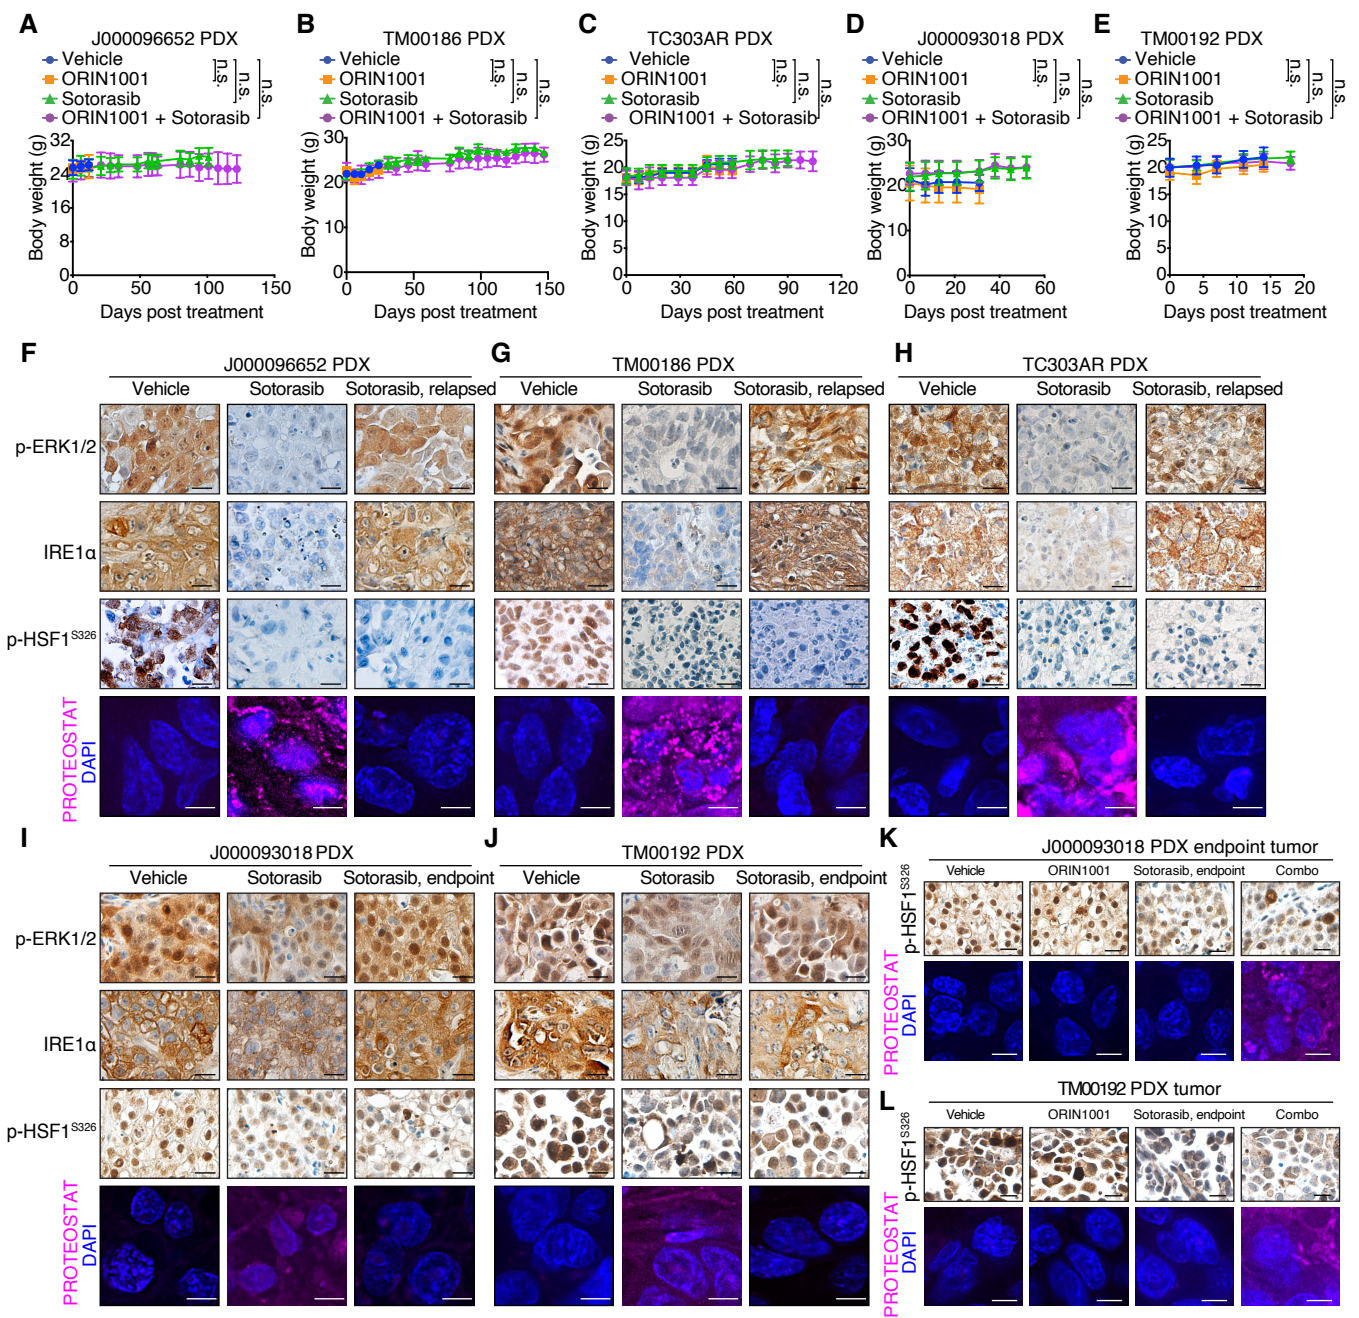

**Figure S18. Proteostasis reprogramming upon KRAS inhibition in NSCLC PDX models.**

**A-E.** Body weight of PDX tumor-bearing NSG mice treated with vehicle, ORIN1001, sotorasib, or ORIN1001 plus sotorasib as shown in **Figure 8, C-G.** **F-J. Upper panels:** Immunohistochemical staining of p-ERK1/2, IRE1α or p-HSF1 (Ser326) in established J000096652 (**F**), TM00186 (**G**), TC303AR (**H**), J000093018 (**I**), or TM00192 (**J**) PDX tumors treated with vehicle or sotorasib for 2 days, or until endpoint. Scale bar: 40μm. **Lower panels:** Representative images of PROTEOSTAT (magenta) and DAPI (blue) staining in PDX tumors treated as described above. Scale bar: 20μm. **K-L.** Immunohistochemical staining of p-HSF1 (Ser 326) (**Upper panels**) or representative images of PROTEOSTAT (magenta) and DAPI (blue) staining (**Lower panels**) in endpoint J000093018 (**K**) and TM00192 (**L**) PDX tumors treated with vehicle, IRE1α RNase inhibitor ORIN1001, sotorasib, or ORIN1001 plus sotorasib. Scale bar: 20μm. Data are presented as mean ± SD (**A** to **E**). Two-way ANOVA test with Bonferroni's multiple comparisons test was used to calculate *P* values. n.s., not significant.

Supplementary Table 1. Cell lines used in this study

| Cell line                      | Species             | Catalog      | Identifier (RRID) | Supplier                                                                                                                   | Reference |
|--------------------------------|---------------------|--------------|-------------------|----------------------------------------------------------------------------------------------------------------------------|-----------|
| MIA-PaCa-2                     | <i>Homo sapiens</i> | CRM-CRL-1420 | CVCL_0428         | ATCC                                                                                                                       |           |
| SW1990                         | <i>Homo sapiens</i> | CRL-2172     | CVCL_1723         | ATCC                                                                                                                       |           |
| 293T                           | <i>Homo sapiens</i> | CRL-3216     | CVCL_0063         | ATCC                                                                                                                       |           |
| H358                           | <i>Homo sapiens</i> | CRL-5807     | CVCL_1559         | ATCC                                                                                                                       |           |
| BEAS-2B                        | <i>Homo sapiens</i> | CRL-9609     | CVCL_0168         | ATCC                                                                                                                       |           |
| PATC53                         | <i>Homo sapiens</i> |              | CVCL_VR69         | Dr. Michael Kim at The University of Texas MD Anderson Cancer Center                                                       | 90        |
| PATC148                        | <i>Homo sapiens</i> |              |                   | Dr. Michael Kim at The University of Texas MD Anderson Cancer Center                                                       | 90        |
| <i>iKras</i>                   | <i>mus musculus</i> |              |                   | Derived from GEMM ( <i>tetO_LSL-Kras<sup>G12D</sup>/p53<sup>flax/+</sup>/p48-Cre/ROSA26-LSL-rtTA-IRES-GFP</i> )            | 55        |
| <i>LSL-Kras<sup>G12D</sup></i> | <i>mus musculus</i> |              |                   | Derived from GEMM ( <i>LSL-Kras<sup>G12D</sup>/p53<sup>flax/+</sup>/p48-Cre</i> )                                          | 55        |
| <i>iKras<sup>R_YAP1</sup></i>  | <i>mus musculus</i> |              |                   | Derived from GEMM tumor relapsed in the absence of Dox ( <i>tetO_LSL-Kras<sup>G12D</sup>/p53<sup>flax/+</sup>/p48-Ci</i> ) | 37        |

**Supplementary Table 2. Reagents and Kits used in this study****1. Reagents**

| <b>Name</b>                                           | <b>Catalog</b> | <b>Supplier</b>   |
|-------------------------------------------------------|----------------|-------------------|
| DMEM W/GLN GLU PYR                                    | 45000-306      | VWR/Corning       |
| RPMI 1640 WITH L-GLU                                  | 45000-398      | VWR/Corning       |
| Gibco Fetal Bovine Serum (FBS)                        | 10437028       | Life Technology   |
| Charcoal stripped FBS                                 | 97065-304      | VWR               |
| Penicillin and streptomycin                           | 15140163       | Life Technologies |
| TrypLE™ Express Enzyme (1X), no phenol red            | 12604021       | Life Technologies |
| Puromycin                                             | P8833          | MilliporeSigma    |
| Doxycycline                                           | AAJ60579-22    | VWR               |
| Blasticidin S HCl solution                            | 3513-03-09     | Santa Cruz        |
| Lipofectamine 3000                                    | L300008        | Thermo Fisher     |
| Polybrene                                             | TR1003G        | Sigma             |
| Power SYBR Green PCR Master Mix                       | 4367659        | Thermo Fisher     |
| DAPI (4',6-Diamidino-2-Phenylindole, Dihydrochloride) | D1306          | Thermo Fisher     |
| TRIzol™ LS Reagent                                    | 10296028       | Thermo Fisher     |
| MKC8866 (ORIN1001)                                    | HY-104040      | MedChemExpress    |
| Sotorasib                                             | AMG510         | Chemgood          |
| Trametinib                                            | HY-10999       | MedChemExpress    |
| SCH772984                                             | HY-50846       | MedChemExpress    |
| MK2206                                                | HY-10358       | MedChemExpress    |
| Pictilisib                                            | S1065          | Selleckchem       |
| MG132                                                 | HY-13259       | MedChemExpress    |
| Tunicamycin                                           | 76102-666      | VWR               |
| Tauroursodeoxycholic Acid, Sodium Salt (TUDCA)        | 580549         | Millipore         |
| Agarose, Ultra-low Gelling Temperature                | A5030          | Sigma             |
| Congo Red                                             | 234610         | Sigma             |
| Thioflavin T                                          | T3516          | Sigma             |
| Crystal Violet                                        | 97061-850      | VWR               |
| Methanol                                              | 179337         | Sigma             |
| EDTA                                                  | 45001-122      | VWR/CORNING       |
| Triton X-100                                          | T8787          | Sigma             |
| NP-40                                                 | 97064-918      | VWR               |
| Paraformaldehyde                                      | P6148          | Sigma             |
| Hydrogen peroxide 30% stabilized ACS                  | BDH7690-1      | VWR               |
| Goat Serum                                            | G9023          | Sigma             |
| Hematoxylin solution (Mayer)                          | 100504-658     | VWR               |
| Tris-HCl pH 6.8                                       | NP21-112       | SignalChem        |
| Tris-HCl pH7.5                                        | 15567027       | Life Technologies |
| Sodium chloride solution                              | S5150          | Sigma             |
| Sodium deoxycholate                                   | 30970          | Sigma             |
| Sodium dodecyl sulfate (SDS)                          | L3771          | Sigma             |
| N-Ethylmaleimide                                      | E3876          | Sigma             |
| Urea                                                  | 9510           | Sigma             |
| DTT                                                   | 646563         | Sigma             |
| Glycerol                                              | G5516          | Sigma             |
| β-mercaptoethanol                                     | M3148          | Sigma             |
| Bromophenol blue                                      | 114391         | Sigma             |
| EZview™ Red ANTI-FLAG® M2 Affinity Gel                | F-2426         | Sigma             |
| EZview™ Red Anti-c-Myc Affinity Gel                   | E-6654         | Sigma             |
| GSH-Sepharose                                         | 17075601       | GE Healthcare     |
| Ni-NTA Agarose                                        | 30210          | QIAGEN            |

|                                       |              |                |
|---------------------------------------|--------------|----------------|
| GST-ERK2                              | M28-10G-20   | SignalChem     |
| Kinase assay buffer I                 | K01-09       | SignalChem     |
| ATP, [ $\gamma$ -32P]                 | NEG002A100UC | PerkinElmer    |
| cOmplete™ Protease Inhibitor Cocktail | 14826500     | Roche          |
| PhosSTOP                              | 4906845001   | Sigma          |
| One-Step Blue Protein Gel Stain       | 21003        | Biotium        |
| SHP099                                | HY-100388    | MedChemExpress |
| Gefitinib                             | HY-50895     | MedChemExpress |
| Osimertinib                           | HY-15772     | MedChemExpress |
| CB-5083                               | HY-12861     | MedChemExpress |
| GST-ERK1                              | M29-10G-10   | Signalchem     |
| Sapitinib                             | HY-13050     | MedChemExpress |
| Axitinib                              | HY-10065     | MedChemExpress |
| VU6015929                             | HY-135401    | MedChemExpress |
| AZD4547                               | HY-13330     | MedChemExpress |

## 2. Kits

| Name                                                | Catalog        | Supplier                 |
|-----------------------------------------------------|----------------|--------------------------|
| PROTEOSTAT® Aggresome detection kit                 | ENZ-510350K100 | Enzo Life Sciences       |
| FITC BrdU Flow Kit                                  | 559619         | BD Biosciences           |
| Dual-Luciferase® Reporter Assay System              | E1910          | Promega                  |
| Proteasome Activity Fluorometric Assay Kit          | K245           | BioVision                |
| Q5® Site-Directed Mutagenesis Kit                   | E0554          | New England Biolabs      |
| Cell Counting Kit-8 (CCK-8)                         | K1018          | APExBIO                  |
| Pierce™ BCA Protein Assay Kit                       | 23225          | Thermo Fisher Scientific |
| High-Capacity cDNA Reverse Transcription Kit        | 4368813        | Thermo Fisher Scientific |
| ImmPRESS Excel HRP Goat Anti-Rabbit Polymer Reagent | MP-7451-15     | Vector labs              |
| Dako Liquid DAB+ Substrate Chromogen System         | K3468          | Dako                     |
| Proteome Profiler Human Phospho-RTK Array Kit       | ARY001B        | R&D systems              |

### Supplementary Table 3. Primers used in this study

#### 1. shRNA targeting region (5'-3')

|                 |                       |
|-----------------|-----------------------|
| shScr           | CCTAAGGTTAAGTCGCCCTCG |
| shXbp1          | CCAGGAGTTAAGAACACGCTT |
| shIre1 $\alpha$ | GGAATTACTGGCTTCTCAT   |
| shPerk.1        | CCATGAGTTCATCTGGAACAA |
| shPerk.2        | GCCACTTTGAACTTCGGTATA |
| shGcn2.1        | GTTGGTGAAGTATAGCTTAAA |
| shGcn2.2        | TGTCCAATGAAAGTGTTAATT |
| shHri           | ACAAACGTCACGCTACTTAAA |
| shPkr           | GGAGTAGCCATTACGTATAAA |
| shScp3          | AGTGATCATCGTGGACAATTC |
| shPERK          | ATCATAGCAACAACGTTTATT |
| shNCK           | GCGAGTTCGAAATTCATGAA  |
| shIRE1 $\alpha$ | GCAGGACATCTGGTATGTTAT |
| shSEL1L         | GCAAAGGCTCTTGTATATTAT |
| shYap1.1        | TGAGAACAATGACAACCAATA |
| shYap1.2        | CCACCAAGCTAGATAAAGAAA |

#### 2. sgRNA targeting region (5'-3')

|                    |                      |
|--------------------|----------------------|
| sgScr              | GCACTACCAGAGCTAACTCA |
| sgXbp1.1           | ACGCTTGGGAATGGACACGC |
| sgXbp1.2           | GGACACGCTGGATCCTGACG |
| sgIre1 $\alpha$ .1 | CTTGTTGTTTGTCTCGACCC |
| sgIre1 $\alpha$ .2 | AGAGGACGGGCTCCATCAAG |

#### 3. 4 X Heatshock Response Element reporter (5'-3')

4 X HSE + minimal promoter CCTGGAAGATTCTAGAACGTTCTGGAAGATTCTAGAACGTTCCAGAGGGTATATAATGGAAGCTCGACTTCCAGA

#### 4. Primers for RT-qPCR (5'-3')

|               | Forward                  | Reverse                   |
|---------------|--------------------------|---------------------------|
| Actin         | TACCACCATGTACCCAGGCA     | CTCAGGAGGAGCAATGATCTTGAT  |
| KrasG12D      | GCTTATCGATACCGTCGATCG    | GGTCATACTCATCCACAAAGTG    |
| Kras          | ACGAAACAGGCTCAGGAGTTAG   | GCATCGTCAACACCCTGTCT      |
| Xbp1s         | CTGAGTCCGCAGCAGGTG       | TCCAACCTGTCCAGAATGCC      |
| Edem          | AATAACTGATCCAAACAGCCG    | TGTCTTCAGATTCACCCGAG      |
| Sec61a1       | CTGGCGGTAGAATGCCTCT      | TGAGACCATTGTGTGGAAGG      |
| Xbp1 splicing | ACACGCTTGGGAATGGACAC     | CCATGGGAAGATGTTCTGGG      |
| ACTIN         | GCGAGAAGATGACCCAGATC     | CCAGTGGTACGGCCAGAGG       |
| HSPA6         | CGGTTCTCTCCATTGACGCT     | CCGTTGTGCGAAGTCTCTC       |
| HSPA1B        | GGGTCAGGCCCTACCATTGA     | TTGAGTCCCAACAGTCCACCT     |
| IRE1 $\alpha$ | AGTATGTGGAGCAGAAGGAC     | GTTGTGTGGCTTTAGGTCTC      |
| Bloc1s1       | AGCCAAGGCATAGTCCAGTTC    | CTTCTCTCCTCTTCTCCTGCG     |
| Scara3        | GTGCTGGCCTCTCTGGTTTTT    | GACCTTCTGATCTCTTGCCC      |
| Hgsnat        | TCTCCGCTTTCTCCATTTTG     | CGCATAACAGTGGAAAGTCA      |
| Prom1         | ACTGTGCCCATGAAAAATTTGGAA | AGCTTCAACTCCAGTTGTCAATATC |
| Vwa5a         | AGCTTTGAAGCCTTGGTGAT     | ACTCGCTGTGAGCCTTCATC      |
| Txnip         | CCGACACACTTACCTTGCCA     | GGACACTGACGTAGATCAGCAA    |
| NCK           | GACCTCAACATGCCCGCTTA     | CCATTGTAGCTACCACGCCA      |
| PPM1A         | GTCCCCGACTTAGTCCATGTG    | CTCTTGCTTGCCAATTCACCC     |
| PPM1D         | GAGTGAGCGCTTCTCCGAC      | TTCGGGCTCCACAACGATTT      |
| PPM1G         | TCATTTGCTTCAAGCCCCGA     | CCCCTCAGTAGAGACACCT       |
| PPM2C         | GAAGAGGACGGCTCATGGTC     | TGCCCTAAATGGCATCAGCA      |
| PPM1H         | CCAATTTTCATGGGCGGCATC    | TCCACCTCGTCTGAGACAG       |
| ILKAP         | TCCGGCAATCTTGTGTCGTT     | CCCATCCCTGACGTTTCCTC      |



|                 |                        |                        |
|-----------------|------------------------|------------------------|
| <i>PPP4C</i>    | GTGCGCTAAGGCCAGAGAGAT  | CGCTATAGAAGCCACGGTCC   |
| <i>PPA1</i>     | TTGACGAAGGGGAAACCGAC   | AAGTAGCCAGGTTTCAGCCG   |
| <i>PPA2</i>     | CTGTACCACACTGAGGAGCG   | CTTCCAGGTAACCCGGTTTGAA |
| <i>PPP6C</i>    | ACCATCGAACGGAATCAGGAA  | TGCTCCTCGGGGACTGATAG   |
| <i>PPP3CC</i>   | TTTACGGAACCTCCC GCCCTT | CCTCGGACAGTGTGTGGG     |
| <i>PPM1M</i>    | ACATCCAGCTCAAGCCCTTC   | TGAGAACCTGTGTGGGTCCT   |
| <i>PPP1CB</i>   | AGGTACGAGGATGTCTGCCA   | TCAGCGGTGCTTCCAATTCC   |
| <i>PPP3CA</i>   | TGGTCCCTTCCATTTGTTGGG  | ACACTCTGGCCATTTTGCTT   |
| <i>PPM1J</i>    | AACAGATGGCCTGTGGGATG   | ACCTGCTGTGGTCATTAGGC   |
| <i>PPP7C</i>    | GCCAGACAACACTATGCCCT   | CCCTCATGTCTGTTTCGCTT   |
| <i>SCP2</i>     | AAGGTGCAACGCTGGTTGAT   | GCAGGAATGTCTCCTGTAGC   |
| <i>PPM1B</i>    | GTCATGCGCATCTTGTCTGC   | GCCTGAGAGCTTCCACCAAT   |
| <i>PPTC7</i>    | CTGACGGCAACAGATGGACT   | ACATGCAAACCTGTGCAAAGGT |
| <i>SCP4</i>     | AAAGCAAACCTGGTCAGGCACC | AAGGCTTGTGGTGAGTTGTCA  |
| <i>PPP5C</i>    | ACCGGAAATGTGCCTACCAG   | TGAGTGTGGTTTCCACGAGC   |
| <i>PPM1L</i>    | CTGAGACCCGAGACGCTTTT   | GCTACCTTGCCCTTACCAT    |
| <i>PP2CZeta</i> | AACAGATGGCCTGTGGGATG   | ACCTGCTGTGGTCATTAGGC   |
| <i>SCP3</i>     | CCCATACCAAGTCCACCAGC   | CCGCTTCAGCACATACCTT    |
| <i>FCP1a</i>    | AGCGACAGCCAGTATGTCT    | CTGCCCTTCCAAGGATGTCTG  |
| <i>PPP2CA</i>   | CGTTGTGGTAACCAAGCTGC   | TGCTGGGTCAAACCTGCAAGA  |
| <i>PPP2CB</i>   | TGCCAATGGTCTCACACTGG   | GCCTGGTTCCCAACAGATA    |
| <i>PPP3CB</i>   | AGTTTGCCTCTTGCTGCACT   | GTCCAAATGCAGGTGGCTCT   |
| <i>PDXP</i>     | CTGTTGACTGTGACGGGG     | TGTTGTTGCTCACAACAGAGC  |
| <i>PPM1L</i>    | GATGAAGCAGGCACAACGTG   | CTTTGTACACAGGACCCCG    |
| <i>ACTIN</i>    | GCGAGAAGATGACCCAGATC   | CCAGTGGTACGGCCAGAGG    |

#### 5. Primers for cloning (5'-3')

|                                                | <b>Forward</b>              | <b>Reverse</b>                   |
|------------------------------------------------|-----------------------------|----------------------------------|
| <i>IRE1<math>\alpha</math></i>                 | AGAATTCATGCCGGCCCGCGGCTGCT  | CCCAAGCTTTCAGAGGGCGTCTGGAGTCA    |
| <i>IRE1<math>\alpha</math>_shRNA resistant</i> | ggtacgtcatTGACCTCTGACCGGAGA | atatacttgtTTTTACCCATGTAGAGGATTCC |
| <i>IRE1<math>\alpha</math>_S525A</i>           | GGGCACCAGCgcCCCCAGCACG      | GAGCTCTCTGAGTACGGG               |
| <i>IRE1<math>\alpha</math>_S529A</i>           | CCCCAGCACGgCCCCAGGGC        | CTGCTGGTGCCCGAGCTCTCTGAGTACG     |
| <i>IRE1<math>\alpha</math>_S549A</i>           | GGCTGGCAGCgcCCCCCTCCTG      | TTGGAGGCAGAGCTGCCG               |
| <i>IRE1<math>\alpha</math>_T973A</i>           | GCCCCAGTGgCTCCAGACGC        | TGGGGCTCTGGGGGCTCG               |
| <i>IRE1<math>\alpha</math>_K599A</i>           | CGTGCCGTGgcGAGGATCCTC       | TCGCGTTGTCAAACATG                |
| <i>IRE1<math>\alpha</math>_K907A</i>           | CATGAGAAATgcGAAGCACCCTACCG  | GCTCGGAGGAGATCTCTG               |
| <i>IRE1<math>\alpha</math>_S525D</i>           | GGGCACCAGCgaCCCCAGCACG      | GAGCTCTCTGAGTACGGG               |
| <i>IRE1<math>\alpha</math>_S529D</i>           | CCCCAGCACGgaCCCCAGGGCC      | CTGCTGGTGCCCGAGCTC               |
| <i>IRE1<math>\alpha</math>_S549D</i>           | GGCTGGCAGCgaCCCCCTCCTG      | TTGGAGGCAGAGCTGCCG               |
| <i>IRE1<math>\alpha</math>_T973E</i>           | GCCCCAGTGgaaCCAGACGCC       | TGGGGCTCTGGGGGCTCG               |
| <i>IRE1<math>\alpha</math>_V918F</i>           | GCCTGCAGAGttcCGGGAGACGC     | AGCTCCCGGTAGTGGTGC               |
| <i>IRE1<math>\alpha</math>_Δ2M</i>             | GATGGAATCCTCTACATG          | TTTATCATCATCATCTTTATAATCC        |
| <i>IRE1<math>\alpha</math>_ΔD-motif 1</i>      | CTGCAAGAGTATGTGGAGC         | CTCCGTGCAGAAGTAGCG               |
| <i>IRE1<math>\alpha</math>_ΔD-motif 2</i>      | CACGGCAAGATCAAGGCC          | GTGAACGATGTTGAGGGAG              |
| <i>IRE1<math>\alpha</math>_ΔD-motif 3</i>      | GGGTCCCTCCCCGACGAC          | ATTTCTCATGGCTCGGAGGAGATCTC       |

#### 6. Primers for XBP1 splicing (5'-3')

|                      | <b>Forward</b>       | <b>Reverse</b>          |
|----------------------|----------------------|-------------------------|
| <i>Xbp1 splicing</i> | ACACGCTTGGGAATGGACAC | CCATGGGAAGATGTTCTGGG    |
| <i>XBP1 splicing</i> | CCTGGTTGCTGAAGAGGAGG | CCA TGGGGAGA TGTTCTGGAG |

**Supplementary Table 4. Plasmids used in this study**

| <b>Gene symbol</b>                      | <b>Catalog</b>      | <b>Supplier</b>                   | <b>Note</b>       |
|-----------------------------------------|---------------------|-----------------------------------|-------------------|
| <i>IRE1</i> $\alpha$                    | NA                  | Generated in this study           | shRNA resistant   |
| <i>IRE1</i> $\alpha$ _K599A             | NA                  | Generated in this study           | shRNA resistant   |
| <i>IRE1</i> $\alpha$ _K599A,S525A,T973A | NA                  | Generated in this study           | shRNA resistant   |
| <i>IRE1</i> $\alpha$ _K599A,S529A,T973A | NA                  | Generated in this study           | shRNA resistant   |
| <i>IRE1</i> $\alpha$ _K599A,S549A,T973A | NA                  | Generated in this study           | shRNA resistant   |
| <i>IRE1</i> $\alpha$ _K599A,T973A       | NA                  | Generated in this study           | shRNA resistant   |
| <i>IRE1</i> $\alpha$ _K599A,4A          | NA                  | Generated in this study           | shRNA resistant   |
| <i>IRE1</i> $\alpha$ _S525A             | NA                  | Generated in this study           | shRNA resistant   |
| <i>IRE1</i> $\alpha$ _S529A             | NA                  | Generated in this study           | shRNA resistant   |
| <i>IRE1</i> $\alpha$ _S549A             | NA                  | Generated in this study           | shRNA resistant   |
| <i>IRE1</i> $\alpha$ _T973A             | NA                  | Generated in this study           | shRNA resistant   |
| <i>IRE1</i> $\alpha$ _4A                | NA                  | Generated in this study           | shRNA resistant   |
| <i>IRE1</i> $\alpha$ _S525D             | NA                  | Generated in this study           | shRNA resistant   |
| <i>IRE1</i> $\alpha$ _S529D             | NA                  | Generated in this study           | shRNA resistant   |
| <i>IRE1</i> $\alpha$ _S549D             | NA                  | Generated in this study           | shRNA resistant   |
| <i>IRE1</i> $\alpha$ _T973E             | NA                  | Generated in this study           | shRNA resistant   |
| <i>IRE1</i> $\alpha$ _SDTE              | NA                  | Generated in this study           | shRNA resistant   |
| <i>IRE1</i> $\alpha$ _V918F             | NA                  | Generated in this study           | shRNA resistant   |
| <i>IRE1</i> $\alpha$ _Δ2M               | NA                  | Generated in this study           | shRNA resistant   |
| <i>IRE1</i> $\alpha$ _K907A             | NA                  | Generated in this study           | shRNA resistant   |
| <i>IRE1</i> $\alpha$ _ΔD-motif 1        | NA                  | Generated in this study           | Cytosolic portion |
| <i>IRE1</i> $\alpha$ _ΔD-motif 2        | NA                  | Generated in this study           | Cytosolic portion |
| <i>IRE1</i> $\alpha$ _ΔD-motif 3        | NA                  | Generated in this study           | Cytosolic portion |
| <i>IRE1</i> $\alpha$ _ΔD-motif 1-3      | NA                  | Generated in this study           | Cytosolic portion |
| BRAF <sup>V600E</sup>                   | NA                  | Generated as described previously | 91                |
| MEK <sup>DD</sup>                       | NA                  | Generated as described previously | 91                |
| PIK3CA <sup>H1047R</sup>                | NA                  | Generated as described previously | 91                |
| Flag-HA-HRD1                            | NA                  | Generated previously in our lab   | 91                |
| ILKAP                                   | PLOHS_100005430     | Precision LentiORF collection     |                   |
| PPM1M                                   | PLOHS_100067193     | Precision LentiORF collection     |                   |
| PPA1                                    | PLOHS_100006227     | Precision LentiORF collection     |                   |
| PPA2                                    | PLOHS_100066443     | Precision LentiORF collection     |                   |
| PPM1A                                   | PLOHS_100004396     | Precision LentiORF collection     |                   |
| PPM1D                                   | PLOHS_100003677     | Precision LentiORF collection     |                   |
| PPM1G                                   | PLOHS_100004780     | Precision LentiORF collection     |                   |
| PPM1H                                   | PLOHS_100064031     | Precision LentiORF collection     |                   |
| PPM2C                                   | PLOHS_ccsbBEn_03447 | Precision LentiORF collection     |                   |
| PPP1CC                                  | PLOHS_100067022     | Precision LentiORF collection     |                   |
| PPP4C                                   | PLOHS_100004577     | Precision LentiORF collection     |                   |
| SCP4                                    | PLOHS_100006354     | Precision LentiORF collection     |                   |
| PP2Ceta                                 | PLOHS_100073830     | Precision LentiORF collection     |                   |
| PPM1B                                   | PLOHS_100072155     | Precision LentiORF collection     |                   |
| PPP1CA                                  | PLOHS_ccsbBEn_01258 | Precision LentiORF collection     |                   |

|                                   |                     |                               |
|-----------------------------------|---------------------|-------------------------------|
| PPP1CB                            | PLOHS_100002296     | Precision LentiORF collection |
| PPP3CA                            | PLOHS_100002562     | Precision LentiORF collection |
| PPP3CC                            | PLOHS_100071792     | Precision LentiORF collection |
| PPP6C                             | PLOHS_ccsbBEn_01270 | Precision LentiORF collection |
| PPP7C                             | PLOHS_100066919     | Precision LentiORF collection |
| SCP2                              | PLOHS_100071501     | Precision LentiORF collection |
| PPTC7/TA-PP2C                     | PLOHS_ccsbBEn_05108 | Precision LentiORF collection |
| PP2CZeta                          | PLOHS_100067287     | Precision LentiORF collection |
| <i>shMAPK1.1</i>                  | V2LHS_47254         | Dharmacon Reagents            |
| <i>shMAPK1.2</i>                  | V2LHS_217986        | Dharmacon Reagents            |
| <i>shMAPK3.1</i>                  | V3LHS_634594        | Dharmacon Reagents            |
| <i>shMAPK3.2</i>                  | V3LHS_634592        | Dharmacon Reagents            |
| PPP2CA                            | 10689               | Addgene                       |
| PPP2CB                            | 67923               | Addgene                       |
| PPP3CB                            | 179135              | Addgene                       |
| Myr-AKT                           | 46969               | Addgene                       |
| FCP1a                             | NA                  | Generated in this study       |
| PDXP                              | NA                  | Generated in this study       |
| SCP3                              | NA                  | Generated in this study       |
| PPM2C2                            | NA                  | Generated in this study       |
| PPP5C                             | NA                  | Generated in this study       |
| PPM1L                             | NA                  | Generated in this study       |
| <i>shScr</i>                      | NA                  | Generated in this study       |
| <i>shXbp1</i>                     | NA                  | Generated in this study       |
| <i>shIre1 <math>\alpha</math></i> | NA                  | Generated in this study       |
| <i>shPerk.1</i>                   | NA                  | Generated in this study       |
| <i>shPerk.2</i>                   | NA                  | Generated in this study       |
| <i>shGcn2.1</i>                   | NA                  | Generated in this study       |
| <i>shGcn2.2</i>                   | NA                  | Generated in this study       |
| <i>shHri</i>                      | NA                  | Generated in this study       |
| <i>shPkr</i>                      | NA                  | Generated in this study       |
| <i>shScp3</i>                     | NA                  | Generated in this study       |
| <i>shPERK</i>                     | NA                  | Generated in this study       |
| <i>shNCK</i>                      | NA                  | Generated in this study       |
| <i>shIRE1 <math>\alpha</math></i> | NA                  | Generated in this study       |
| <i>shSEL1L</i>                    | NA                  | Generated in this study       |
| Myc-SEL1L                         | NA                  | Generated in this study       |

**Supplementary Table 5. Antibodies used in this study**

**1. Antibodies used in WB**

| Antibody                                     | Catalog       | Supplier                 | Dilution | Host   | Identifier (RRID) | Website                                                                                                                                                                                                                                                                                                       |
|----------------------------------------------|---------------|--------------------------|----------|--------|-------------------|---------------------------------------------------------------------------------------------------------------------------------------------------------------------------------------------------------------------------------------------------------------------------------------------------------------|
| Phospho-p44/42 MAPK (Erk1/2) (Thr202/Tyr204) | 4370          | Cell Signaling           | 1:1000   | Rabbit | AB_2315112        | <a href="https://www.cellsignal.com/products/primary-antibodies/phospho-p44-42-mapk-erk1-2-thr202-tyr204-d13-14-4e-xp-rabbit-mab/4370#pdpCiteABCitations">https://www.cellsignal.com/products/primary-antibodies/phospho-p44-42-mapk-erk1-2-thr202-tyr204-d13-14-4e-xp-rabbit-mab/4370#pdpCiteABCitations</a> |
| p44/42 MAPK (Erk1/2) (Thr202/Tyr204)         | 4695          | Cell Signaling           | 1:1000   | Rabbit | AB_390779         | <a href="https://www.cellsignal.com/products/primary-antibodies/p44-42-mapk-erk1-2-137f5-rabbit-mab/4695#pdpCiteABCitations">https://www.cellsignal.com/products/primary-antibodies/p44-42-mapk-erk1-2-137f5-rabbit-mab/4695#pdpCiteABCitations</a>                                                           |
| Phospho-MEK1/2 (Ser217/221)                  | 9154          | Cell Signaling           | 1:1000   | Rabbit | AB_2138017        | <a href="https://www.cellsignal.com/products/primary-antibodies/phospho-mek1-2-ser217-221-41g9-rabbit-mab/9154#pdpCiteABCitations">https://www.cellsignal.com/products/primary-antibodies/phospho-mek1-2-ser217-221-41g9-rabbit-mab/9154#pdpCiteABCitations</a>                                               |
| MEK1/2                                       | 9122          | Cell Signaling           | 1:1000   | Rabbit | AB_823567         | <a href="https://www.cellsignal.com/products/primary-antibodies/mek1-2-antibody/9122#pdpCiteABCitations">https://www.cellsignal.com/products/primary-antibodies/mek1-2-antibody/9122#pdpCiteABCitations</a>                                                                                                   |
| ACTIN                                        | 4970          | Cell Signaling           | 1:3000   | Rabbit | AB_2223172        | <a href="https://www.cellsignal.com/products/primary-antibodies/b-actin-13e5-rabbit-mab/4970#pdpCiteABCitations">https://www.cellsignal.com/products/primary-antibodies/b-actin-13e5-rabbit-mab/4970#pdpCiteABCitations</a>                                                                                   |
| GAPDH                                        | sc-32233      | SantaCruz                | 1:10000  | Mouse  | AB_627679         | <a href="https://www.scbt.com/p/gapdh-antibody-6c5">https://www.scbt.com/p/gapdh-antibody-6c5</a>                                                                                                                                                                                                             |
| IRE1 $\alpha$                                | 3294          | Cell Signaling           | 1:1000   | Rabbit | AB_823545         | <a href="https://www.cellsignal.com/products/primary-antibodies/ire1a-14c10-rabbit-mab/3294#pdpCiteABCitations">https://www.cellsignal.com/products/primary-antibodies/ire1a-14c10-rabbit-mab/3294#pdpCiteABCitations</a>                                                                                     |
| VINCULIN                                     | A1758         | Abclonal                 | 1:1000   | Rabbit | AB_2763802        | <a href="https://abclonal.com/catalog-antibodies/VinculinRabbitAb/A1758">https://abclonal.com/catalog-antibodies/VinculinRabbitAb/A1758</a>                                                                                                                                                                   |
| HSF1                                         | 4356          | Cell Signaling           | 1:1000   | Rabbit | AB_2120258        | <a href="https://www.cellsignal.com/products/primary-antibodies/hsf1-antibody/4356#pdpCiteABCitations">https://www.cellsignal.com/products/primary-antibodies/hsf1-antibody/4356#pdpCiteABCitations</a>                                                                                                       |
| Phospho-HSF1 (Ser326)                        | BSM-52166R    | Life Technologies        | 1:1000   | Rabbit |                   | <a href="https://www.themofisher.com/antibody/product/Phospho-HSF1-Ser326-Antibody-clone-37E4-Monoclonal/BSM-52166R">https://www.themofisher.com/antibody/product/Phospho-HSF1-Ser326-Antibody-clone-37E4-Monoclonal/BSM-52166R</a>                                                                           |
| LC3                                          | 2775          | Cell Signaling           | 1:1000   | Rabbit | AB_915950         | <a href="https://www.cellsignal.com/products/primary-antibodies/lc3b-antibody/2775#pdpCiteABCitations">https://www.cellsignal.com/products/primary-antibodies/lc3b-antibody/2775#pdpCiteABCitations</a>                                                                                                       |
| PERK                                         | 3192          | Cell Signaling           | 1:1000   | Rabbit | AB_2095847        | <a href="https://www.cellsignal.com/products/primary-antibodies/perk-c33e10-rabbit-mab/3192#pdpCiteABCitations">https://www.cellsignal.com/products/primary-antibodies/perk-c33e10-rabbit-mab/3192#pdpCiteABCitations</a>                                                                                     |
| Phospho-PERK(Thr980)                         | 3179          | Cell Signaling           | 1:1000   | Rabbit | AB_2095853        | <a href="https://www.cellsignal.com/products/primary-antibodies/phospho-perk-thr980-16f8-rabbit-mab/3179#pdpCiteABCitations">https://www.cellsignal.com/products/primary-antibodies/phospho-perk-thr980-16f8-rabbit-mab/3179#pdpCiteABCitations</a>                                                           |
| ATF6                                         | 65880         | Cell Signaling           | 1:1000   | Rabbit | AB_2799696        | <a href="https://www.cellsignal.com/products/primary-antibodies/atf-6-d4z8v-rabbit-mab/65880#pdpCiteABCitations">https://www.cellsignal.com/products/primary-antibodies/atf-6-d4z8v-rabbit-mab/65880#pdpCiteABCitations</a>                                                                                   |
| XBP1s                                        | 619502        | Biolegend                | 1:1000   | Rabbit | AB_315908         | <a href="https://www.labome.com/product/BioLegend/619502.html">https://www.labome.com/product/BioLegend/619502.html</a>                                                                                                                                                                                       |
| Phospho-AKT(Ser473)                          | 4060          | Cell Signaling           | 1:1000   | Rabbit | AB_2315049        | <a href="https://www.cellsignal.com/products/primary-antibodies/phospho-akt-ser473-d9e-xp-rabbit-mab/4060#pdpCiteABCitations">https://www.cellsignal.com/products/primary-antibodies/phospho-akt-ser473-d9e-xp-rabbit-mab/4060#pdpCiteABCitations</a>                                                         |
| K48-linkage Specific Polyubiquitin           | A-101         | BostonBiochem            | 1:1000   | Mouse  | AB_2894847        | <a href="https://www.mdsystems.com/products/ubiquitin-k48-linkage-antibody-1001c_a-101#product-citations">https://www.mdsystems.com/products/ubiquitin-k48-linkage-antibody-1001c_a-101#product-citations</a>                                                                                                 |
| AKT                                          | 4691          | Cell Signaling           | 1:1000   | Rabbit | AB_915783         | <a href="https://www.cellsignal.com/products/primary-antibodies/akt-pan-c67e7-rabbit-mab/4691#pdpCiteABCitations">https://www.cellsignal.com/products/primary-antibodies/akt-pan-c67e7-rabbit-mab/4691#pdpCiteABCitations</a>                                                                                 |
| Myc-tag                                      | sc-40         | SantaCruz                | 1:3000   | Mouse  | AB_2857941        | <a href="https://www.scbt.com/p/c-myc-antibody-9e10">https://www.scbt.com/p/c-myc-antibody-9e10</a>                                                                                                                                                                                                           |
| Flag-tag                                     | F1804         | Sigma                    | 1:3000   | Mouse  | AB_262044         | <a href="https://www.sigmaaldrich.com/US/en/product/sigma/ff1804">https://www.sigmaaldrich.com/US/en/product/sigma/ff1804</a>                                                                                                                                                                                 |
| His-tag                                      | AE028         | Abclonal                 | 1:1000   | Mouse  | AB_2769867        | <a href="https://abclonal.com/catalog-antibodies/HRPconjugatedMouseantiHisTagAb/AE028#Publication">https://abclonal.com/catalog-antibodies/HRPconjugatedMouseantiHisTagAb/AE028#Publication</a>                                                                                                               |
| SEL1L                                        | PA5-88333     | Thermo Fisher Scientific | 1:1000   | Rabbit | AB_2804837        | <a href="https://www.themofisher.com/antibody/product/SEL1L-Antibody-Polyclonal/PA5-88333">https://www.themofisher.com/antibody/product/SEL1L-Antibody-Polyclonal/PA5-88333</a>                                                                                                                               |
| HRD1                                         | 14773         | Cell Signaling           | 1:1000   | Rabbit | AB_2798607        | <a href="https://www.cellsignal.com/products/primary-antibodies/syvn1-d3o2a-rabbit-mab/14773#pdpCiteABCitations">https://www.cellsignal.com/products/primary-antibodies/syvn1-d3o2a-rabbit-mab/14773#pdpCiteABCitations</a>                                                                                   |
| pS/T*P                                       | 9391          | Cell Signaling           | 1:200    | Mouse  | AB_331801         | <a href="https://www.cellsignal.com/products/primary-antibodies/phospho-threonine-proline-mouse-mab-p-thr-pro-101/9391#pdpCiteABCitations">https://www.cellsignal.com/products/primary-antibodies/phospho-threonine-proline-mouse-mab-p-thr-pro-101/9391#pdpCiteABCitations</a>                               |
| KRAS                                         | H00003845-MO1 | Abnova                   | 1:500    | Mouse  | AB_425519         | <a href="http://www.abnova.com/products/products_detail.asp?catalog_id=H00003845-MO1">http://www.abnova.com/products/products_detail.asp?catalog_id=H00003845-MO1</a>                                                                                                                                         |
| Phospho-HSF1(Ser121)                         | OASG03625     | Aviva                    | 1:1000   | Rabbit |                   | <a href="https://www.avivasysbio.com/hsf1-antibody-phospho-ser121-oasg03625.html">https://www.avivasysbio.com/hsf1-antibody-phospho-ser121-oasg03625.html</a>                                                                                                                                                 |
| eIF2a                                        | 11386         | SantaCruz                | 1:1000   | Rabbit | AB_640075         | <a href="https://www.scbt.com/p/eif2alpha-antibody-fl-315">https://www.scbt.com/p/eif2alpha-antibody-fl-315</a>                                                                                                                                                                                               |
| Phospho-eIF2a (Ser51)                        | 9721          | Cell Signaling           | 1:1000   | Rabbit | AB_330952         | <a href="https://www.cellsignal.com/products/primary-antibodies/phospho-eif2a-ser51-antibody/9721">https://www.cellsignal.com/products/primary-antibodies/phospho-eif2a-ser51-antibody/9721</a>                                                                                                               |
| ATF4                                         | 11815         | Cell Signaling           | 1:1000   | Rabbit | AB_2616025        | <a href="https://www.cellsignal.com/products/primary-antibodies/atf-4-d4b8-rabbit-mab/11815">https://www.cellsignal.com/products/primary-antibodies/atf-4-d4b8-rabbit-mab/11815</a>                                                                                                                           |
| GCN2                                         | 3302          | Cell Signaling           | 1:1000   | Rabbit | AB_2277617        | <a href="https://www.cellsignal.com/products/primary-antibodies/gcn2-antibody/3302">https://www.cellsignal.com/products/primary-antibodies/gcn2-antibody/3302</a>                                                                                                                                             |
| Phospho-GCN2 (Thr899)                        | 94668         | Cell Signaling           | 1:1000   | Rabbit |                   | <a href="https://www.cellsignal.com/products/primary-antibodies/phospho-gcn2-thr899-e1v9m-rabbit-mab/94668">https://www.cellsignal.com/products/primary-antibodies/phospho-gcn2-thr899-e1v9m-rabbit-mab/94668</a>                                                                                             |
| Phospho-EGFR (Tyr1068)                       | 3777          | Cell Signaling           | 1:1000   | Rabbit | AB_2096270        | <a href="https://www.cellsignal.com/products/primary-antibodies/phospho-egf-receptor-tyr1068-d7a5-xp-rabbit-mab/3777">https://www.cellsignal.com/products/primary-antibodies/phospho-egf-receptor-tyr1068-d7a5-xp-rabbit-mab/3777</a>                                                                         |
| Phospho-ErbB2 (Tyr1221/1222)                 | 2243          | Cell Signaling           | 1:500    | Rabbit | AB_490899         | <a href="https://www.cellsignal.com/products/primary-antibodies/phospho-her2-erb2-tyr1221-1222-6b12-rabbit-mab/2243">https://www.cellsignal.com/products/primary-antibodies/phospho-her2-erb2-tyr1221-1222-6b12-rabbit-mab/2243</a>                                                                           |
| Phospho-ErbB3 (Tyr1222)                      | AP1052        | Abclonal                 | 1:500    | Rabbit | AB_2863925        | <a href="https://abclonal.com/catalog-antibodies/PhosphoErbB3HER3Y1222RabbitmAb/AP1052">https://abclonal.com/catalog-antibodies/PhosphoErbB3HER3Y1222RabbitmAb/AP1052</a>                                                                                                                                     |
| Phospho-VEGFR2 (Tyr1175)                     | 2478          | Cell Signaling           | 1:500    | Rabbit | AB_331377         | <a href="https://www.cellsignal.com/products/primary-antibodies/phospho-vegfr-receptor-2-tyr1175-19a10-rabbit-mab/2478">https://www.cellsignal.com/products/primary-antibodies/phospho-vegfr-receptor-2-tyr1175-19a10-rabbit-mab/2478</a>                                                                     |
| Phospho-FGFR (Tyr653/654)                    | 3471          | Cell Signaling           | 1:500    | Rabbit | AB_331072         | <a href="https://www.cellsignal.com/products/primary-antibodies/phospho-fgf-receptor-tyr653-654-antibody/3471">https://www.cellsignal.com/products/primary-antibodies/phospho-fgf-receptor-tyr653-654-antibody/3471</a>                                                                                       |
| Phospho-PDGFR $\beta$ (Tyr751)               | 4549          | Cell Signaling           | 1:500    | Rabbit | AB_1147704        | <a href="https://www.cellsignal.com/products/primary-antibodies/phospho-pdgfr-receptor-b-tyr751-c63g6-rabbit-mab/4549">https://www.cellsignal.com/products/primary-antibodies/phospho-pdgfr-receptor-b-tyr751-c63g6-rabbit-mab/4549</a>                                                                       |
| Phospho-DDR1/2 (Tyr796/Tyr740)               | MAB25382-SP   | R&D systems              | 1:500    | Rabbit |                   | <a href="https://www.mdsystems.com/products/human-phospho-ddr1-ddr2-ddr1-y796-ddr2-y740-antibody-1119d_mab25382">https://www.mdsystems.com/products/human-phospho-ddr1-ddr2-ddr1-y796-ddr2-y740-antibody-1119d_mab25382</a>                                                                                   |
| Goat anti-mouse HRP                          | 31430         | Thermo Fisher Scientific | 1:3000   | Goat   | AB_228307         | <a href="https://www.themofisher.com/antibody/product/Goat-anti-Mouse-IgG-HL-Secondary-Antibody-Polyclonal/31430">https://www.themofisher.com/antibody/product/Goat-anti-Mouse-IgG-HL-Secondary-Antibody-Polyclonal/31430</a>                                                                                 |
| Goat anti-rabbit HRP                         | 31460         | Thermo Fisher Scientific | 1:3000   | Goat   | AB_228341         | <a href="https://www.themofisher.com/antibody/product/Goat-anti-Rabbit-IgG-HL-Secondary-Antibody-Polyclonal/31460">https://www.themofisher.com/antibody/product/Goat-anti-Rabbit-IgG-HL-Secondary-Antibody-Polyclonal/31460</a>                                                                               |
| YAP (D8H1X)                                  | 14074         | Cell Signaling           | 1:1000   | Rabbit | AB_2650491        | <a href="https://www.cellsignal.com/products/primary-antibodies/yap-d8h1x-xp-rabbit-mab/14074">https://www.cellsignal.com/products/primary-antibodies/yap-d8h1x-xp-rabbit-mab/14074</a>                                                                                                                       |
| Phospho-YAP (Ser127)                         | 4911          | Cell Signaling           | 1:1000   | Rabbit | AB_2218913        | <a href="https://www.cellsignal.com/products/primary-antibodies/phospho-yap-ser127-antibody/4911">https://www.cellsignal.com/products/primary-antibodies/phospho-yap-ser127-antibody/4911</a>                                                                                                                 |

**2. Antibodies used in IHC**

| Antibody                                     | Catalog    | Supplier          | Dilution | Host   | Identifier (RRID) | Website                                                                                                                                                                                                                                                                                         |
|----------------------------------------------|------------|-------------------|----------|--------|-------------------|-------------------------------------------------------------------------------------------------------------------------------------------------------------------------------------------------------------------------------------------------------------------------------------------------|
| IRE1 $\alpha$                                | 3294       | Cell Signaling    | 1:20     | Rabbit | AB_823545         | <a href="https://www.cellsignal.com/products/primary-antibodies/ire1a-14c10-rabbit-mab/3294#pdpCiteABCitations">https://www.cellsignal.com/products/primary-antibodies/ire1a-14c10-rabbit-mab/3294#pdpCiteABCitations</a>                                                                       |
| Phospho-p44/42 MAPK (Erk1/2) (Thr202/Tyr204) | 4376       | Cell Signaling    | 1:200    | Rabbit | AB_331772         | <a href="https://www.cellsignal.com/products/primary-antibodies/phospho-p44-42-mapk-erk1-2-thr202-tyr204-20g11-rabbit-mab/4376#pdpCiteABCitations">https://www.cellsignal.com/products/primary-antibodies/phospho-p44-42-mapk-erk1-2-thr202-tyr204-20g11-rabbit-mab/4376#pdpCiteABCitations</a> |
| Phospho-HSF1 (Ser326)                        | BSM-52166R | Life Technologies | 1:200    | Rabbit |                   | <a href="https://www.themofisher.com/antibody/product/Phospho-HSF1-Ser326-Antibody-clone-37E4-Monoclonal/BSM-52166R">https://www.themofisher.com/antibody/product/Phospho-HSF1-Ser326-Antibody-clone-37E4-Monoclonal/BSM-52166R</a>                                                             |
| Phospho-PERK(Thr980)                         | 3179       | Cell Signaling    | 1:1000   | Rabbit | AB_2095853        | <a href="https://www.cellsignal.com/products/primary-antibodies/phospho-perk-thr980-16f8-rabbit-mab/3179#pdpCiteABCitations">https://www.cellsignal.com/products/primary-antibodies/phospho-perk-thr980-16f8-rabbit-mab/3179#pdpCiteABCitations</a>                                             |
| Phospho-AKT(Ser473)                          | 4060       | Cell Signaling    | 1:1000   | Rabbit | AB_2315049        | <a href="https://www.cellsignal.com/products/primary-antibodies/phospho-akt-ser473-d9e-xp-rabbit-mab/4060#pdpCiteABCitations">https://www.cellsignal.com/products/primary-antibodies/phospho-akt-ser473-d9e-xp-rabbit-mab/4060#pdpCiteABCitations</a>                                           |
| Phospho-GCN2 (Thr899)                        | PA5-105886 | Thermo Fisher     | 1:200    | Rabbit |                   | <a href="https://www.themofisher.com/antibody/product/Phospho-GCN2-Thr899-Antibody-Polyclonal/PA5-105886">https://www.themofisher.com/antibody/product/Phospho-GCN2-Thr899-Antibody-Polyclonal/PA5-105886</a>                                                                                   |
| Phospho-eIF2a (Ser51)                        | 9721       | Cell Signaling    | 1:50     | Rabbit | AB_330952         | <a href="https://www.cellsignal.com/products/primary-antibodies/phospho-eif2a-ser51-antibody/9721">https://www.cellsignal.com/products/primary-antibodies/phospho-eif2a-ser51-antibody/9721</a>                                                                                                 |
| ATF4                                         | 390063     | Santa Cruz        | 1:50     | Mouse  | AB_2910206        | <a href="https://www.scbt.com/p/atf4-antibody-b-3">https://www.scbt.com/p/atf4-antibody-b-3</a>                                                                                                                                                                                                 |
| YAP (D8H1X)                                  | 14074      | Cell Signaling    | 1:400    | Rabbit | AB_2650491        | <a href="https://www.cellsignal.com/products/primary-antibodies/yap-d8h1x-xp-rabbit-mab/14074">https://www.cellsignal.com/products/primary-antibodies/yap-d8h1x-xp-rabbit-mab/14074</a>                                                                                                         |

## **Materials Design Analysis Reporting (MDAR)** **Checklist for Authors**

The MDAR framework establishes a minimum set of requirements in transparent reporting applicable to studies in the life sciences (see Statement of Task: [doi:10.31222/osf.io/9sm4x](https://doi.org/10.31222/osf.io/9sm4x)). The MDAR checklist is a tool for authors, editors, and others seeking to adopt the MDAR framework for transparent reporting in manuscripts and other outputs. Please refer to the MDAR Elaboration Document for additional context for the MDAR framework.

**For all that apply, please note where in the manuscript the required information is provided.**

**Materials:**

|                                                                                                                                                                                                                                                     |                                                                                                                                                                          |            |
|-----------------------------------------------------------------------------------------------------------------------------------------------------------------------------------------------------------------------------------------------------|--------------------------------------------------------------------------------------------------------------------------------------------------------------------------|------------|
| <b>Newly created materials</b>                                                                                                                                                                                                                      | <b>indicate where provided: page no/section/legend)</b>                                                                                                                  | <b>n/a</b> |
| The manuscript includes a dedicated "materials availability statement" providing transparent disclosure about availability of newly created materials including details on how materials can be accessed and describing any restrictions on access. | Newly generated plasmids are described in <b>Materials and Methods, "Plasmids, virus production , and infection"</b> section and listed in <b>Supplementary Table 4.</b> |            |
| <b>Antibodies</b>                                                                                                                                                                                                                                   | <b>indicate where provided: page no/section/legend)</b>                                                                                                                  | <b>n/a</b> |
| For commercial reagents, provide supplier name, catalogue number and <a href="#">RRID</a> , if available.                                                                                                                                           | <b>Supplementary Table 5.</b>                                                                                                                                            |            |
| <b>DNA and RNA sequences</b>                                                                                                                                                                                                                        | <b>indicate where provided: page no/section/legend)</b>                                                                                                                  | <b>n/a</b> |
| <b>Short novel DNA or RNA including primers, probes:</b> Sequences should be included or deposited in a public repository.                                                                                                                          | <b>Supplementary Table 3.</b>                                                                                                                                            |            |
| <b>Cell materials</b>                                                                                                                                                                                                                               | <b>indicate where provided: page no/section/legend)</b>                                                                                                                  | <b>n/a</b> |
| <b>Cell lines:</b> Provide species information, strain. Provide accession number in repository <b>OR</b> supplier name, catalogue number, clone number, <b>OR</b> RRID.                                                                             | <b>Materials and Methods, "Cell culture and treatment section"</b> section and listed in <b>Supplementary Table 1.</b>                                                   |            |
| <b>Primary cultures:</b> Provide species, strain, sex of origin, genetic modification status.                                                                                                                                                       |                                                                                                                                                                          | N/A        |
| <b>Experimental animals</b>                                                                                                                                                                                                                         | <b>indicate where provided: page no/section/legend)</b>                                                                                                                  | <b>n/a</b> |
| <b>Laboratory animals or Model organisms:</b> Provide species, strain, sex, age, genetic modification status. Provide accession number in repository <b>OR</b> supplier name, catalogue number, clone number, <b>OR</b> RRID.                       | <b>Materials and Methods, "Tumor inoculation and treatment"</b> section.                                                                                                 |            |
| <b>Animal observed in or captured from the field:</b> Provide species, sex, and age where possible.                                                                                                                                                 |                                                                                                                                                                          | N/A        |
| <b>Plants and microbes</b>                                                                                                                                                                                                                          | <b>indicate where provided: page no/section/legend)</b>                                                                                                                  | <b>n/a</b> |
| <b>Plants:</b> provide species and strain, ecotype and cultivar where relevant, unique accession number if available, and source (including location for collected wild specimens).                                                                 |                                                                                                                                                                          | N/A        |
| <b>Microbes:</b> provide species and strain, unique accession number if available, and source.                                                                                                                                                      |                                                                                                                                                                          | N/A        |
| <b>Human research participants</b>                                                                                                                                                                                                                  | <b>indicate where provided: page no/section/legend) or state if these demographics were not collected</b>                                                                | <b>n/a</b> |
| If collected and within the bounds of privacy constraints report on age, sex and gender or ethnicity for all study participants.                                                                                                                    |                                                                                                                                                                          | N/A        |

## Design:

|                                                                                                                                                                            |                                                                                                          |     |
|----------------------------------------------------------------------------------------------------------------------------------------------------------------------------|----------------------------------------------------------------------------------------------------------|-----|
| <b>Study protocol</b>                                                                                                                                                      | indicate where provided: page no/section/legend)                                                         | n/a |
| If study protocol has been pre-registered, provide DOI. For clinical trials, provide the trial registration number <b>OR</b> cite DOI.                                     |                                                                                                          | N/A |
| <b>Laboratory protocol</b>                                                                                                                                                 | indicate where provided: page no/section/legend)                                                         | n/a |
| Provide DOI <b>OR</b> other citation details if detailed step-by-step protocols are available.                                                                             | No citation for protocol. All the detailed protocols are provided in <b>Materials and Methods</b> .      |     |
| <b>Experimental study design (statistics details)</b>                                                                                                                      |                                                                                                          |     |
| <b>For in vivo studies:</b> State whether and how the following have been done                                                                                             | indicate where provided: page no/section/legend. If it could have been done, but was not, write not done | n/a |
| Sample size determination                                                                                                                                                  | <b>Materials and Methods “Statistics and reproducibility” section.</b>                                   |     |
| Randomisation                                                                                                                                                              | <b>Materials and Methods “Tumor inoculation and treatment” section.</b>                                  |     |
| Blinding                                                                                                                                                                   | <b>Materials and Methods “Statistics and reproducibility” section.</b>                                   |     |
| Inclusion/exclusion criteria                                                                                                                                               | <b>Materials and Methods “Statistics and reproducibility” section.</b>                                   |     |
| <b>Sample definition and in-laboratory replication</b>                                                                                                                     | indicate where provided: page no/section/legend                                                          | n/a |
| State number of times the experiment was replicated in laboratory.                                                                                                         | <b>Materials and Methods “Statistics and reproducibility” section and figure legends.</b>                |     |
| Define whether data describe technical or biological replicates.                                                                                                           | <b>Materials and Methods “Statistics and reproducibility” section and figure legends.</b>                |     |
| <b>Ethics</b>                                                                                                                                                              | indicate where provided: page no/section/legend                                                          | n/a |
| <b>Studies involving human participants:</b> State details of authority granting ethics approval (IRB or equivalent committee(s), provide reference number for approval.   |                                                                                                          | N/A |
| <b>Studies involving experimental animals:</b> State details of authority granting ethics approval (IRB or equivalent committee(s), provide reference number for approval. | <b>Materials and Methods, “Study approval” section.</b>                                                  |     |
| <b>Studies involving specimen and field samples:</b> State if relevant permits obtained, provide details of authority approving study; if none were required, explain why. |                                                                                                          | N/A |
| <b>Dual Use Research of Concern (DURC)</b>                                                                                                                                 | indicate where provided: page no/section/legend                                                          | n/a |
| If study is subject to dual use research of concern regulations, state the authority granting approval and reference number for the regulatory approval.                   |                                                                                                          | N/A |

## Analysis:

| <b>Attrition</b>                                                                                                                                                                                                    | <b>indicate where provided: page no/section/legend</b> | <b>n/a</b> |
|---------------------------------------------------------------------------------------------------------------------------------------------------------------------------------------------------------------------|--------------------------------------------------------|------------|
| Describe whether exclusion criteria were preestablished. Report if sample or data points were omitted from analysis. If yes report if this was due to attrition or intentional exclusion and provide justification. |                                                        | N/A        |

| <b>Statistics</b>                                            | <b>indicate where provided: page no/section/legend</b>                                    | <b>n/a</b> |
|--------------------------------------------------------------|-------------------------------------------------------------------------------------------|------------|
| Describe statistical tests used and justify choice of tests. | <b>Materials and Methods “Statistics and reproducibility” section and figure legends.</b> |            |

| <b>Data availability</b>                                                                                                                                       | <b>indicate where provided: page no/section/legend</b>                                                                                                                             | <b>n/a</b> |
|----------------------------------------------------------------------------------------------------------------------------------------------------------------|------------------------------------------------------------------------------------------------------------------------------------------------------------------------------------|------------|
| For newly created and reused datasets, the manuscript includes a data availability statement that provides details for access or notes restrictions on access. |                                                                                                                                                                                    | N/A        |
| If newly created datasets are publicly available, provide accession number in repository <b>OR DOI OR</b> URL and licensing details where available.           |                                                                                                                                                                                    | N/A        |
| If reused data is publicly available provide accession number in repository <b>OR DOI OR</b> URL, <b>OR</b> citation.                                          | <b>Materials and Methods “Modeling of the IRE1<math>\alpha</math>-ORIN1001 complex” section, and “Clinical Proteomic Tumor Analysis Consortium (CPTAC) data analysis” section.</b> |            |

| <b>Code availability</b>                                                                                                                                                                                                                                             | <b>indicate where provided: page no/section/legend</b> | <b>n/a</b> |
|----------------------------------------------------------------------------------------------------------------------------------------------------------------------------------------------------------------------------------------------------------------------|--------------------------------------------------------|------------|
| For all newly generated custom computer code/software/mathematical algorithm or re-used code essential for replicating the main findings of the study, the manuscript includes a data availability statement that provides details for access or notes restrictions. |                                                        | N/A        |
| If newly generated code is publicly available, provide accession number in repository, <b>OR DOI OR</b> URL and licensing details where available. State any restrictions on code availability or accessibility.                                                     |                                                        | N/A        |
| If reused code is publicly available provide accession number in repository <b>OR DOI OR</b> URL, <b>OR</b> citation.                                                                                                                                                |                                                        | N/A        |



## **Reporting**

MDAR framework recommends adoption of discipline-specific guidelines, established and endorsed through community initiatives. Journals have their own policy about requiring specific guidelines and recommendations to complement MDAR.

| <b>Adherence to community standards</b>                                                                                                                                | <b>indicate where provided: page no/section/legend</b> | <b>n/a</b> |
|------------------------------------------------------------------------------------------------------------------------------------------------------------------------|--------------------------------------------------------|------------|
| State if relevant guidelines (e.g., ICMJE, MIBBI, ARRIVE) have been followed, and whether a checklist (e.g., CONSORT, PRISMA, ARRIVE) is provided with the manuscript. | <b>ICMJE criteria have been followed.</b>              |            |
